# Supplementary material for: Exploiting branched-chain amino acid metabolism and NOTCH3 expression to predict and target colorectal cancer progression
Source: Frontiers journal article supplement (doi:10.3389/fimmu.2024.1430352), 2024-09-02

|          | <b>pvalue</b> | <b>Hazard ratio</b> |
|----------|---------------|---------------------|
| NOTCH3   | 0.027         | 1.025(1.003–1.048)  |
| HMGCL    | 0.031         | 0.933(0.876–0.994)  |
| NOTCH4   | 0.034         | 1.189(1.013–1.395)  |
| IVD      | 0.044         | 1.039(1.001–1.079)  |
| NOTCH1   | 0.124         | 1.017(0.995–1.038)  |
| SLC7A5   | 0.134         | 1.005(0.998–1.012)  |
| HADHA    | 0.469         | 1.005(0.992–1.018)  |
| ACADS    | 0.479         | 0.994(0.977–1.011)  |
| HSD17B10 | 0.584         | 0.999(0.995–1.003)  |
| MYC      | 0.643         | 0.998(0.992–1.005)  |
| ALDH6A1  | 0.698         | 0.981(0.888–1.082)  |
| ACAT1    | 0.779         | 0.992(0.938–1.050)  |
| SLC1A5   | 0.956         | 1.000(0.997–1.003)  |
| SLC7A8   | 0.963         | 1.000(0.981–1.020)  |

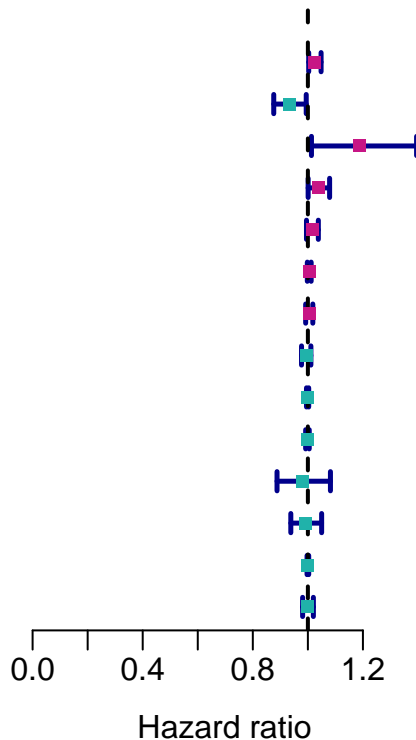

Supplement: Data_Sheet_2.ZIP [file Data_Sheet_2.ZIP]
