# Supplementary material for: Exploiting branched-chain amino acid metabolism and NOTCH3 expression to predict and target colorectal cancer progression
Source: Frontiers journal article supplement (doi:10.3389/fimmu.2024.1430352), 2024-09-02
Supplement: Data_Sheet_2.ZIP [file Data_Sheet_2.ZIP]

id	HR	HR.95L	HR.95H	pvalue
NOTCH3	1.025145228	1.002813552	1.047974209	0.027105944
HMGCL	0.93278323	0.875517223	0.993794903	0.031356808
NOTCH4	1.189166686	1.013391593	1.395430371	0.033756354
IVD	1.039105766	1.001026259	1.078633836	0.044029287
NOTCH1	1.016600964	0.995494361	1.038155071	0.12402334
SLC7A5	1.005029066	0.998458892	1.011642474	0.133853613
HADHA	1.004692835	0.992036531	1.017510606	0.46916375
ACADS	0.993915512	0.977277172	1.010837122	0.478598678
HSD17B10	0.998953811	0.995214022	1.002707655	0.584394313
MYC	0.998382774	0.991573165	1.005239148	0.642998324
ALDH6A1	0.980625299	0.888469939	1.08233935	0.697604911
ACAT1	0.99195989	0.937537769	1.049541102	0.779166953
SLC1A5	1.00008498	0.997070977	1.003108095	0.955994671
SLC7A8	1.000460114	0.980945737	1.020362699	0.963492916
