# Supplementary material for: Exploiting branched-chain amino acid metabolism and NOTCH3 expression to predict and target colorectal cancer progression
Source: Front Immunol. 2024 Sep 2;15:1430352. doi: 10.3389/fimmu.2024.1430352 (PMC11402679; doi:10.3389/fimmu.2024.1430352)
Supplement: Supplementary file 13 [file Table2.xlsx]

## Sheet: Catalogue
Catalogue
Table S1	Acronyms and Definitions:
Table S2	Listing and Describing the Roles of the 30 Genes
Table S3	Differentially expressed genes of GSE166555 from TISCH2
Table S4	Differentially expressed genes of GSE166555 by R software
Table S5	Distribution of 13 cell types and intersectgenes in GSE166555 by R software

## Sheet: Table S1
Acronyms and Definitions:
APC	Antigen Presenting Cell
AUC	Area Under the Curve
BCAA	Branched Chain Amino Acids
BCKAs	Branched-Chain Ketoacids
BRS	BCAA Metabolism Related Signature
COAD	Colon Adenocarcinoma
CTLA4	Cytotoxic T Lymphocyte Associated Protein 4
DSS	Disease Specific Survival
GEO	Gene Expression Omnibus
HE	Hematoxylin and Eosin
IC50	Half Maximal Inhibitory Concentration
KM	Kaplan Meier
LASSO	Least Absolute Shrinkage and Selection Operator
MDSC	Myeloid Derived Suppressor Cells
OS	Overall Survival
PD1	Programmed Cell Death Protein 1
PFI	Progression Free Interval
qRT-PCR	Quantitative Reverse Transcription Polymerase Chain Reaction
ROC	Receiver Operating Characteristic
ssGSEA	Single Sample Gene Set Enrichment Analysis
TCGA	The Cancer Genome Atlas
TIP	Tracking Tumor Immunophenotype
TISCH2	Tumor Immune Single Cell Hub 2
TMB	Tumor Mutational Burden
TME	Tumor Microenvironment

## Sheet: Table S2
Gene	Description
ACADS	Catalyzes the initial step in the mitochondrial fatty acid beta-oxidation pathway.
ACADSB	Similar to ACADS, involved in short branched-chain acyl-CoA dehydrogenation.
ACAT1	Converts acetyl-CoA to acetoacetyl-CoA, involved in ketogenesis and cholesterol metabolism.
ALDH6A1	Converts methylmalonate semialdehyde to propionyl-CoA in valine and isoleucine catabolism.
AUH	Involved in the degradation of isoleucine and valine.
BCAT1	Catalyzes the first step in BCAA catabolism, significant in cancer metabolism.
BCAT2	Similar to BCAT1, involved in BCAA catabolism.
BCKDHA	Component of the BCKDH complex, critical in BCAA catabolism.
BCKDHB	Another component of the BCKDH complex, involved in BCAA breakdown.
BCKDK	Regulates the BCKDH complex by inhibiting its activity, controlling BCAA catabolism.
DLD	An essential mitochondrial enzyme involved in energy metabolism, citric acid cycle and branched-chain amino acid catabolism.
HADHA	Involved in mitochondrial beta-oxidation of fatty acids.
HIBADH	Involved in the catabolism of valine, converting hydroxyisobutyric acid to methylmalonic semialdehyde.
HIBCH	Catalyzes the hydrolysis of 3-hydroxyisobutyryl-CoA in valine catabolism.
HMGCL	Catalyzes the conversion of HMG-CoA to acetoacetate and acetyl-CoA.
HSD17B10	Multifunctional enzyme involved in fatty acid oxidation and steroid metabolism.
IVD	Catalyzes the third step in leucine catabolism, involved in energy production.
MYC	Oncogene that regulates cell cycle progression, apoptosis, and metabolism.
NOTCH1	Involved in cell differentiation, proliferation, and apoptosis.
NOTCH2	Similar roles to NOTCH1, with specific functions in various tissues.
NOTCH3	Plays a role in cell proliferation, differentiation, and tumor growth.
NOTCH4	Involved in angiogenesis and development of vascular systems.
OXCT1	Involved in ketone body metabolism, converts acetoacetate to acetoacetyl-CoA.
PCCB	Catalyzes the carboxylation of propionyl-CoA to methylmalonyl-CoA, important in amino acid metabolism.
SLC1A5	Mediates transport of neutral amino acids, critical for cancer cell metabolism.
SLC3A2	Component of various amino acid transporters, important for amino acid transport.
SLC43A1	Transports large neutral amino acids including BCAAs, linked to cancer cell proliferation.
SLC43A2	Functions similarly to SLC43A1, important in amino acid transport.
SLC7A5	Amino acid transporter, involved in leucine uptake, essential for cell growth.
SLC7A8	Transports neutral amino acids, including BCAAs, across cell membranes.

## Sheet: Table S3
Cluster	Celltype (malignancy)	Celltype (major-lineage)	Celltype (minor-lineage)	Gene	log2FC	Percentage (%)	Adjusted p-value
0	Immune cells	CD4Tconv	CD4Tconv	IL7R	1.84	79.9	0
0	Immune cells	CD4Tconv	CD4Tconv	CD2	1.71	81.8	0
0	Immune cells	CD4Tconv	CD4Tconv	KLRB1	1.68	52.1	0
0	Immune cells	CD4Tconv	CD4Tconv	CD3D	1.64	85.6	0
0	Immune cells	CD4Tconv	CD4Tconv	TRBC1	1.62	60	0
0	Immune cells	CD4Tconv	CD4Tconv	TRAC	1.59	77.8	0
0	Immune cells	CD4Tconv	CD4Tconv	CCL5	1.55	56.4	0
0	Immune cells	CD4Tconv	CD4Tconv	TNFAIP3	1.55	86	0
0	Immune cells	CD4Tconv	CD4Tconv	GZMK	1.54	24.9	0
0	Immune cells	CD4Tconv	CD4Tconv	TRBC2	1.52	70.5	0
0	Immune cells	CD4Tconv	CD4Tconv	S100A4	1.5	85.4	0
0	Immune cells	CD4Tconv	CD4Tconv	CCL4	1.49	31.2	0
0	Immune cells	CD4Tconv	CD4Tconv	CD3E	1.45	78.3	0
0	Immune cells	CD4Tconv	CD4Tconv	CD3G	1.45	72	0
0	Immune cells	CD4Tconv	CD4Tconv	LTB	1.43	60.2	0
0	Immune cells	CD4Tconv	CD4Tconv	PTPRC	1.37	92.6	0
0	Immune cells	CD4Tconv	CD4Tconv	CXCR4	1.37	89.6	0
0	Immune cells	CD4Tconv	CD4Tconv	ANXA1	1.35	53.5	0
0	Immune cells	CD4Tconv	CD4Tconv	SPOCK2	1.34	56.8	0
0	Immune cells	CD4Tconv	CD4Tconv	CREM	1.33	66.6	0
0	Immune cells	CD4Tconv	CD4Tconv	CD69	1.32	70.4	0
0	Immune cells	CD4Tconv	CD4Tconv	DUSP2	1.29	67.4	0
0	Immune cells	CD4Tconv	CD4Tconv	CD52	1.28	83.8	0
0	Immune cells	CD4Tconv	CD4Tconv	DUSP4	1.28	39.5	0
0	Immune cells	CD4Tconv	CD4Tconv	HCST	1.24	66.9	0
0	Immune cells	CD4Tconv	CD4Tconv	CD7	1.24	58.2	0
0	Immune cells	CD4Tconv	CD4Tconv	RGCC	1.24	61	0
0	Immune cells	CD4Tconv	CD4Tconv	RORA	1.23	51.5	0
0	Immune cells	CD4Tconv	CD4Tconv	CTLA4	1.22	29.2	0
0	Immune cells	CD4Tconv	CD4Tconv	CST7	1.21	44.9	0
0	Immune cells	CD4Tconv	CD4Tconv	SRGN	1.21	98.1	0
0	Immune cells	CD4Tconv	CD4Tconv	ICOS	1.2	37.9	0
0	Immune cells	CD4Tconv	CD4Tconv	AC058791.1	1.19	61.7	0
0	Immune cells	CD4Tconv	CD4Tconv	RGS1	1.18	68.8	0
0	Immune cells	CD4Tconv	CD4Tconv	FYB1	1.16	70.7	0
0	Immune cells	CD4Tconv	CD4Tconv	ARHGDIB	1.16	81	0
0	Immune cells	CD4Tconv	CD4Tconv	ARL4C	1.15	61.5	0
0	Immune cells	CD4Tconv	CD4Tconv	DNAJA1	1.15	89.2	0
0	Immune cells	CD4Tconv	CD4Tconv	TNFRSF4	1.14	22.7	0
0	Immune cells	CD4Tconv	CD4Tconv	RUNX3	1.12	48.6	0
0	Immune cells	CD4Tconv	CD4Tconv	FYN	1.12	52.9	0
0	Immune cells	CD4Tconv	CD4Tconv	TNFRSF18	1.11	30.7	0
0	Immune cells	CD4Tconv	CD4Tconv	CYTIP	1.09	68.4	0
0	Immune cells	CD4Tconv	CD4Tconv	TSC22D3	1.08	87.7	0
0	Immune cells	CD4Tconv	CD4Tconv	TIGIT	1.08	30.6	0
0	Immune cells	CD4Tconv	CD4Tconv	LCK	1.08	49.2	0
0	Immune cells	CD4Tconv	CD4Tconv	NKG7	1.08	32.9	0
0	Immune cells	CD4Tconv	CD4Tconv	STK17B	1.06	70.2	0
0	Immune cells	CD4Tconv	CD4Tconv	SLA	1.06	44.6	0
0	Immune cells	CD4Tconv	CD4Tconv	DNAJB1	1.05	78.7	0
0	Immune cells	CD4Tconv	CD4Tconv	SAMSN1	1.05	54.8	0
0	Immune cells	CD4Tconv	CD4Tconv	BTG1	1.05	98.8	0
0	Immune cells	CD4Tconv	CD4Tconv	CLEC2D	1.05	49.2	0
0	Immune cells	CD4Tconv	CD4Tconv	SARAF	1.04	83.2	0
0	Immune cells	CD4Tconv	CD4Tconv	GZMA	1.04	41.7	0
0	Immune cells	CD4Tconv	CD4Tconv	CNOT6L	1.04	57.9	0
0	Immune cells	CD4Tconv	CD4Tconv	GPR171	1.03	32.7	0
0	Immune cells	CD4Tconv	CD4Tconv	BCL11B	1.03	46.3	0
0	Immune cells	CD4Tconv	CD4Tconv	GMFG	1.03	65	0
0	Immune cells	CD4Tconv	CD4Tconv	PTPN22	1.02	46.3	0
0	Immune cells	CD4Tconv	CD4Tconv	LCP1	1.02	67.5	0
0	Immune cells	CD4Tconv	CD4Tconv	ITM2A	1.01	45.6	0
0	Immune cells	CD4Tconv	CD4Tconv	CD48	0.99	69.4	0
0	Immune cells	CD4Tconv	CD4Tconv	CCR6	0.99	28.7	0
0	Immune cells	CD4Tconv	CD4Tconv	CLEC2B	0.97	47.3	0
0	Immune cells	CD4Tconv	CD4Tconv	RAC2	0.97	60.6	0
0	Immune cells	CD4Tconv	CD4Tconv	ETS1	0.96	48.8	0
0	Immune cells	CD4Tconv	CD4Tconv	RASGRP1	0.95	37	0
0	Immune cells	CD4Tconv	CD4Tconv	CACYBP	0.95	46.2	0
0	Immune cells	CD4Tconv	CD4Tconv	GZMM	0.95	34.2	0
0	Immune cells	CD4Tconv	CD4Tconv	GIMAP7	0.94	36.4	0
0	Immune cells	CD4Tconv	CD4Tconv	IFNG	0.94	12.6	0
0	Immune cells	CD4Tconv	CD4Tconv	CD8A	0.94	21.9	0
0	Immune cells	CD4Tconv	CD4Tconv	CD247	0.93	40.3	0
0	Immune cells	CD4Tconv	CD4Tconv	TMSB4X	0.93	100	0
0	Immune cells	CD4Tconv	CD4Tconv	ID2	0.93	63.4	0
0	Immune cells	CD4Tconv	CD4Tconv	ZNF331	0.92	55.8	0
0	Immune cells	CD4Tconv	CD4Tconv	REL	0.91	69.1	0
0	Immune cells	CD4Tconv	CD4Tconv	SKAP1	0.91	39.7	0
0	Immune cells	CD4Tconv	CD4Tconv	TNFRSF1B	0.9	41.6	0
0	Immune cells	CD4Tconv	CD4Tconv	PIK3R1	0.89	48.1	0
0	Immune cells	CD4Tconv	CD4Tconv	GPR65	0.88	35.1	0
0	Immune cells	CD4Tconv	CD4Tconv	CORO1A	0.87	47	0
0	Immune cells	CD4Tconv	CD4Tconv	ZC3HAV1	0.86	55.9	0
0	Immune cells	CD4Tconv	CD4Tconv	HSP90AB1	0.86	93.8	0
0	Immune cells	CD4Tconv	CD4Tconv	HSP90AA1	0.86	97.1	0
0	Immune cells	CD4Tconv	CD4Tconv	APBB1IP	0.85	42.8	0
0	Immune cells	CD4Tconv	CD4Tconv	JUNB	0.85	92.6	0
0	Immune cells	CD4Tconv	CD4Tconv	HSPA8	0.85	83.5	0
0	Immune cells	CD4Tconv	CD4Tconv	PIP4K2A	0.84	43.2	0
0	Immune cells	CD4Tconv	CD4Tconv	TNF	0.84	21.7	0
0	Immune cells	CD4Tconv	CD4Tconv	EMB	0.83	40	0
0	Immune cells	CD4Tconv	CD4Tconv	LINC01871	0.83	24.3	0
0	Immune cells	CD4Tconv	CD4Tconv	CD6	0.83	30	0
0	Immune cells	CD4Tconv	CD4Tconv	PDE4D	0.83	33.5	0
0	Immune cells	CD4Tconv	CD4Tconv	PBXIP1	0.82	42	0
0	Immune cells	CD4Tconv	CD4Tconv	DDX5	0.82	97	0
0	Immune cells	CD4Tconv	CD4Tconv	GLIPR1	0.82	43.1	0
0	Immune cells	CD4Tconv	CD4Tconv	STK17A	0.82	45.9	0
0	Immune cells	CD4Tconv	CD4Tconv	TAGAP	0.82	39.6	0
0	Immune cells	CD4Tconv	CD4Tconv	CKLF	0.82	40.5	0
0	Immune cells	CD4Tconv	CD4Tconv	GIMAP4	0.82	30.5	0
0	Immune cells	CD4Tconv	CD4Tconv	DOK2	0.81	29.7	0
0	Immune cells	CD4Tconv	CD4Tconv	LINC00513	0.81	34.2	0
0	Immune cells	CD4Tconv	CD4Tconv	MSN	0.81	53.2	0
0	Immune cells	CD4Tconv	CD4Tconv	FNBP1	0.8	50.3	0
0	Immune cells	CD4Tconv	CD4Tconv	CD53	0.8	56.3	0
0	Immune cells	CD4Tconv	CD4Tconv	SLFN5	0.8	35	0
0	Immune cells	CD4Tconv	CD4Tconv	SMAP2	0.79	59.8	0
0	Immune cells	CD4Tconv	CD4Tconv	RARRES3	0.79	56	0
0	Immune cells	CD4Tconv	CD4Tconv	EIF1	0.79	97.2	0
0	Immune cells	CD4Tconv	CD4Tconv	PIK3IP1	0.78	38.1	0
0	Immune cells	CD4Tconv	CD4Tconv	PARP8	0.78	30	0
0	Immune cells	CD4Tconv	CD4Tconv	EVL	0.77	32.7	0
0	Immune cells	CD4Tconv	CD4Tconv	TRAT1	0.77	24.9	0
0	Immune cells	CD4Tconv	CD4Tconv	CELF2	0.77	51.1	0
0	Immune cells	CD4Tconv	CD4Tconv	CXCR6	0.76	19	0
0	Immune cells	CD4Tconv	CD4Tconv	IL2RB	0.76	27.9	0
0	Immune cells	CD4Tconv	CD4Tconv	GPR183	0.76	48.9	0
0	Immune cells	CD4Tconv	CD4Tconv	LCP2	0.76	36.3	0
0	Immune cells	CD4Tconv	CD4Tconv	GBP5	0.76	24.7	0
0	Immune cells	CD4Tconv	CD4Tconv	RHOH	0.76	41.7	0
0	Immune cells	CD4Tconv	CD4Tconv	GATA3	0.76	23.4	0
0	Immune cells	CD4Tconv	CD4Tconv	IKZF1	0.76	37.1	0
0	Immune cells	CD4Tconv	CD4Tconv	FXYD5	0.75	47.1	0
0	Immune cells	CD4Tconv	CD4Tconv	LAT	0.75	29.7	0
0	Immune cells	CD4Tconv	CD4Tconv	AC044849.1	0.75	31.3	0
0	Immune cells	CD4Tconv	CD4Tconv	IL2RA	0.75	14	0
0	Immune cells	CD4Tconv	CD4Tconv	TUBA1A	0.74	44.3	0
0	Immune cells	CD4Tconv	CD4Tconv	STK4	0.74	50.2	0
0	Immune cells	CD4Tconv	CD4Tconv	IKZF3	0.73	34.4	0
0	Immune cells	CD4Tconv	CD4Tconv	IRF1	0.73	68.8	0
0	Immune cells	CD4Tconv	CD4Tconv	B2M	0.73	70.8	0
0	Immune cells	CD4Tconv	CD4Tconv	MAF	0.73	23.6	0
0	Immune cells	CD4Tconv	CD4Tconv	CD28	0.72	25.4	0
0	Immune cells	CD4Tconv	CD4Tconv	ELF1	0.72	59.4	0
0	Immune cells	CD4Tconv	CD4Tconv	ALOX5AP	0.72	41.8	0
0	Immune cells	CD4Tconv	CD4Tconv	COTL1	0.71	56.3	0
0	Immune cells	CD4Tconv	CD4Tconv	ZFP36L2	0.71	90.3	0
0	Immune cells	CD4Tconv	CD4Tconv	RPS27	0.71	99.8	0
0	Immune cells	CD4Tconv	CD4Tconv	LAPTM5	0.71	66	0
0	Immune cells	CD4Tconv	CD4Tconv	RPLP1	0.71	100	0
0	Immune cells	CD4Tconv	CD4Tconv	IFI16	0.71	46.9	0
0	Immune cells	CD4Tconv	CD4Tconv	WIPF1	0.71	36.2	0
0	Immune cells	CD4Tconv	CD4Tconv	SYTL3	0.7	24.9	0
0	Immune cells	CD4Tconv	CD4Tconv	LSP1	0.7	45.4	0
0	Immune cells	CD4Tconv	CD4Tconv	YPEL5	0.7	59.8	0
0	Immune cells	CD4Tconv	CD4Tconv	CD44	0.7	57.3	0
0	Immune cells	CD4Tconv	CD4Tconv	TNFAIP8	0.69	40.7	0
0	Immune cells	CD4Tconv	CD4Tconv	RPS4Y1	0.69	51.7	0
0	Immune cells	CD4Tconv	CD4Tconv	RNF213	0.69	59.8	0
0	Immune cells	CD4Tconv	CD4Tconv	TNFRSF9	0.69	14.8	0
0	Immune cells	CD4Tconv	CD4Tconv	RPS15A	0.69	99.5	0
0	Immune cells	CD4Tconv	CD4Tconv	AC026979.2	0.69	28.5	0
0	Immune cells	CD4Tconv	CD4Tconv	GPSM3	0.69	40.5	0
0	Immune cells	CD4Tconv	CD4Tconv	HLA-E	0.69	94.2	0
0	Immune cells	CD4Tconv	CD4Tconv	H2AFZ	0.69	70.5	0
0	Immune cells	CD4Tconv	CD4Tconv	RGS10	0.68	42.4	0
0	Immune cells	CD4Tconv	CD4Tconv	ITGAL	0.68	26.5	0
0	Immune cells	CD4Tconv	CD4Tconv	RPS27A	0.67	99.9	0
0	Immune cells	CD4Tconv	CD4Tconv	RAB8B	0.67	33	0
0	Immune cells	CD4Tconv	CD4Tconv	PNRC1	0.67	74.8	0
0	Immune cells	CD4Tconv	CD4Tconv	JUND	0.67	95.4	0
0	Immune cells	CD4Tconv	CD4Tconv	ITK	0.67	23.8	0
0	Immune cells	CD4Tconv	CD4Tconv	JAK1	0.67	62.6	0
0	Immune cells	CD4Tconv	CD4Tconv	NR4A2	0.67	61.4	0
0	Immune cells	CD4Tconv	CD4Tconv	FOXP3	0.67	13.9	0
0	Immune cells	CD4Tconv	CD4Tconv	SEPT7	0.64	64.3	0
0	Immune cells	CD4Tconv	CD4Tconv	ACAP1	0.64	26.9	0
0	Immune cells	CD4Tconv	CD4Tconv	CD40LG	0.64	17.2	0
0	Immune cells	CD4Tconv	CD4Tconv	CALM1	0.63	81.4	0
0	Immune cells	CD4Tconv	CD4Tconv	P2RY10	0.63	24.9	0
0	Immune cells	CD4Tconv	CD4Tconv	ANKRD12	0.63	73.6	0
0	Immune cells	CD4Tconv	CD4Tconv	H3F3B	0.63	98.7	0
0	Immune cells	CD4Tconv	CD4Tconv	RPS19	0.62	99.8	0
0	Immune cells	CD4Tconv	CD4Tconv	PFN1	0.62	84.8	0
0	Immune cells	CD4Tconv	CD4Tconv	RASAL3	0.62	24.5	0
0	Immune cells	CD4Tconv	CD4Tconv	SEPT1	0.61	27.5	0
0	Immune cells	CD4Tconv	CD4Tconv	MYL12A	0.61	85.1	0
0	Immune cells	CD4Tconv	CD4Tconv	SLC2A3	0.61	41.3	0
0	Immune cells	CD4Tconv	CD4Tconv	RPSA	0.6	95.7	0
0	Immune cells	CD4Tconv	CD4Tconv	RPL30	0.6	97.4	0
0	Immune cells	CD4Tconv	CD4Tconv	ITGB2	0.6	33.2	0
0	Immune cells	CD4Tconv	CD4Tconv	NPM1	0.59	73.5	0
0	Immune cells	CD4Tconv	CD4Tconv	CD96	0.59	20.4	0
0	Immune cells	CD4Tconv	CD4Tconv	CD37	0.59	54.4	0
0	Immune cells	CD4Tconv	CD4Tconv	TRGC2	0.59	14.7	0
0	Immune cells	CD4Tconv	CD4Tconv	RPS12	0.58	99.9	0
0	Immune cells	CD4Tconv	CD4Tconv	CD4	0.58	24.6	0
0	Immune cells	CD4Tconv	CD4Tconv	RPS7	0.58	99.2	0
0	Immune cells	CD4Tconv	CD4Tconv	RPL28	0.58	99.5	0
0	Immune cells	CD4Tconv	CD4Tconv	DOCK10	0.58	25.8	0
0	Immune cells	CD4Tconv	CD4Tconv	RPL10	0.58	99.8	0
0	Immune cells	CD4Tconv	CD4Tconv	ZC3H12D	0.57	19.1	0
0	Immune cells	CD4Tconv	CD4Tconv	THEMIS	0.57	17.5	0
0	Immune cells	CD4Tconv	CD4Tconv	SH2D2A	0.57	19.9	0
0	Immune cells	CD4Tconv	CD4Tconv	MCL1	0.57	76.3	0
0	Immune cells	CD4Tconv	CD4Tconv	ARPC2	0.57	79.7	0
0	Immune cells	CD4Tconv	CD4Tconv	GNAI2	0.57	54.3	0
0	Immune cells	CD4Tconv	CD4Tconv	STAT4	0.57	19.1	0
0	Immune cells	CD4Tconv	CD4Tconv	GPR174	0.56	18.2	0
0	Immune cells	CD4Tconv	CD4Tconv	HLA-C	0.56	97.5	0
0	Immune cells	CD4Tconv	CD4Tconv	SH3BGRL3	0.56	90.3	0
0	Immune cells	CD4Tconv	CD4Tconv	OXNAD1	0.56	21.7	0
0	Immune cells	CD4Tconv	CD4Tconv	RPS29	0.56	95.5	0
0	Immune cells	CD4Tconv	CD4Tconv	TPT1	0.56	99.9	0
0	Immune cells	CD4Tconv	CD4Tconv	RPS25	0.55	73.8	0
0	Immune cells	CD4Tconv	CD4Tconv	ZAP70	0.55	19.1	0
0	Immune cells	CD4Tconv	CD4Tconv	HOPX	0.55	19.6	0
0	Immune cells	CD4Tconv	CD4Tconv	RPS3A	0.54	98.8	0
0	Immune cells	CD4Tconv	CD4Tconv	JAML	0.54	21.1	0
0	Immune cells	CD4Tconv	CD4Tconv	RPS3	0.53	90.6	0
0	Immune cells	CD4Tconv	CD4Tconv	PSTPIP1	0.53	19	0
0	Immune cells	CD4Tconv	CD4Tconv	RPL23A	0.53	98.5	0
0	Immune cells	CD4Tconv	CD4Tconv	CD5	0.53	17.6	0
0	Immune cells	CD4Tconv	CD4Tconv	TOMM7	0.52	85.4	0
0	Immune cells	CD4Tconv	CD4Tconv	VIM	0.52	84.2	0
0	Immune cells	CD4Tconv	CD4Tconv	RPL27	0.52	92.1	0
0	Immune cells	CD4Tconv	CD4Tconv	IL18R1	0.52	16.9	0
0	Immune cells	CD4Tconv	CD4Tconv	RPL19	0.51	99.5	0
0	Immune cells	CD4Tconv	CD4Tconv	NCL	0.51	76.7	0
0	Immune cells	CD4Tconv	CD4Tconv	PTMA	0.51	98.5	0
0	Immune cells	CD4Tconv	CD4Tconv	RGL4	0.51	16.8	0
0	Immune cells	CD4Tconv	CD4Tconv	TTC39C	0.51	18	0
0	Immune cells	CD4Tconv	CD4Tconv	JAK3	0.51	20	0
0	Immune cells	CD4Tconv	CD4Tconv	UBA52	0.5	86.5	0
0	Immune cells	CD4Tconv	CD4Tconv	SKP1	0.5	72.7	0
0	Immune cells	CD4Tconv	CD4Tconv	RPS20	0.5	95.4	0
0	Immune cells	CD4Tconv	CD4Tconv	ACTB	0.49	99.2	0
0	Immune cells	CD4Tconv	CD4Tconv	MYBL1	0.49	13.4	0
0	Immune cells	CD4Tconv	CD4Tconv	HLA-A	0.49	99.2	0
0	Immune cells	CD4Tconv	CD4Tconv	RPS26	0.49	86.7	0
0	Immune cells	CD4Tconv	CD4Tconv	RPL21	0.49	98.6	0
0	Immune cells	CD4Tconv	CD4Tconv	RPS13	0.49	94.3	0
0	Immune cells	CD4Tconv	CD4Tconv	RPL6	0.48	97.3	0
0	Immune cells	CD4Tconv	CD4Tconv	AC020571.1	0.48	13.7	0
0	Immune cells	CD4Tconv	CD4Tconv	SIT1	0.48	16.8	0
0	Immune cells	CD4Tconv	CD4Tconv	SIRPG	0.48	15.2	0
0	Immune cells	CD4Tconv	CD4Tconv	RPS16	0.48	99	0
0	Immune cells	CD4Tconv	CD4Tconv	PFDN5	0.47	90.1	0
0	Immune cells	CD4Tconv	CD4Tconv	RPL34	0.47	99.3	0
0	Immune cells	CD4Tconv	CD4Tconv	RPS14	0.47	99.7	0
0	Immune cells	CD4Tconv	CD4Tconv	SCML4	0.47	14.9	0
0	Immune cells	CD4Tconv	CD4Tconv	UBC	0.47	95.7	0
0	Immune cells	CD4Tconv	CD4Tconv	FAU	0.47	98.1	0
0	Immune cells	CD4Tconv	CD4Tconv	RPL3	0.47	99.5	0
0	Immune cells	CD4Tconv	CD4Tconv	RPL32	0.46	99.7	0
0	Immune cells	CD4Tconv	CD4Tconv	RPS4X	0.46	98.4	0
0	Immune cells	CD4Tconv	CD4Tconv	PRKCQ	0.46	14.7	0
0	Immune cells	CD4Tconv	CD4Tconv	RPL9	0.46	98.1	0
0	Immune cells	CD4Tconv	CD4Tconv	RPL5	0.46	93.9	0
0	Immune cells	CD4Tconv	CD4Tconv	RPS10	0.45	77	0
0	Immune cells	CD4Tconv	CD4Tconv	PYHIN1	0.45	13.2	0
0	Immune cells	CD4Tconv	CD4Tconv	RPLP2	0.45	98.7	0
0	Immune cells	CD4Tconv	CD4Tconv	RPL10A	0.44	97.3	0
0	Immune cells	CD4Tconv	CD4Tconv	BTF3	0.44	79.9	0
0	Immune cells	CD4Tconv	CD4Tconv	RPL11	0.43	99.6	0
0	Immune cells	CD4Tconv	CD4Tconv	ZNF831	0.42	13	0
0	Immune cells	CD4Tconv	CD4Tconv	RPL4	0.42	79.9	0
0	Immune cells	CD4Tconv	CD4Tconv	NACA	0.42	96	0
0	Immune cells	CD4Tconv	CD4Tconv	RPL13	0.42	99.7	0
0	Immune cells	CD4Tconv	CD4Tconv	RPL24	0.41	97.9	0
0	Immune cells	CD4Tconv	CD4Tconv	RPS28	0.41	98	0
0	Immune cells	CD4Tconv	CD4Tconv	TNFSF14	0.41	10.4	0
0	Immune cells	CD4Tconv	CD4Tconv	GRAP2	0.41	12.6	0
0	Immune cells	CD4Tconv	CD4Tconv	RPL35A	0.4	98.6	0
0	Immune cells	CD4Tconv	CD4Tconv	RPL37	0.4	99.5	0
0	Immune cells	CD4Tconv	CD4Tconv	PBX4	0.39	12.6	0
0	Immune cells	CD4Tconv	CD4Tconv	RPL14	0.39	97.1	0
0	Immune cells	CD4Tconv	CD4Tconv	RPS23	0.39	95.8	0
0	Immune cells	CD4Tconv	CD4Tconv	RPL13A	0.38	99.5	0
0	Immune cells	CD4Tconv	CD4Tconv	RPL36AL	0.37	85.7	0
0	Immune cells	CD4Tconv	CD4Tconv	RPL18A	0.36	96.6	0
0	Immune cells	CD4Tconv	CD4Tconv	RPS6	0.35	99.4	0
0	Immune cells	CD4Tconv	CD4Tconv	RPS9	0.33	93.4	0
0	Immune cells	CD4Tconv	CD4Tconv	RPS21	0.33	93.3	0
0	Immune cells	CD4Tconv	CD4Tconv	RPL7A	0.32	98.7	0
0	Immune cells	CD4Tconv	CD4Tconv	RPS2	0.31	99.5	0
0	Immune cells	CD4Tconv	CD4Tconv	RPL18	0.31	97.5	0
0	Immune cells	CD4Tconv	CD4Tconv	RPS15	0.3	97.6	0
0	Immune cells	CD4Tconv	CD4Tconv	RPS24	0.28	99	0
0	Immune cells	CD4Tconv	CD4Tconv	RPS8	0.27	98.2	0
0	Immune cells	CD4Tconv	CD4Tconv	RPN1	-0.31	11	0
0	Immune cells	CD4Tconv	CD4Tconv	OS9	-0.32	11.5	0
0	Immune cells	CD4Tconv	CD4Tconv	PDXK	-0.33	9.1	0
0	Immune cells	CD4Tconv	CD4Tconv	SELENOS	-0.38	10.8	0
0	Immune cells	CD4Tconv	CD4Tconv	GPR160	-0.39	1.3	0
0	Immune cells	CD4Tconv	CD4Tconv	METTL7A	-0.42	1.6	0
0	Immune cells	CD4Tconv	CD4Tconv	KDELR1	-0.43	13.7	0
0	Immune cells	CD4Tconv	CD4Tconv	SCARB2	-0.44	2.2	0
0	Immune cells	CD4Tconv	CD4Tconv	FNDC3B	-0.44	4.4	0
0	Immune cells	CD4Tconv	CD4Tconv	TRIB1	-0.45	3.9	0
0	Immune cells	CD4Tconv	CD4Tconv	P4HB	-0.46	22.7	0
0	Immune cells	CD4Tconv	CD4Tconv	COMTD1	-0.47	7.4	0
0	Immune cells	CD4Tconv	CD4Tconv	TCEAL9	-0.47	0.5	0
0	Immune cells	CD4Tconv	CD4Tconv	ALKBH7	-0.47	17.9	0
0	Immune cells	CD4Tconv	CD4Tconv	COX5A	-0.48	26.9	0
0	Immune cells	CD4Tconv	CD4Tconv	PTTG1IP	-0.48	10	0
0	Immune cells	CD4Tconv	CD4Tconv	HIST1H2AC	-0.48	6.2	0
0	Immune cells	CD4Tconv	CD4Tconv	ECI1	-0.48	8.2	0
0	Immune cells	CD4Tconv	CD4Tconv	KIAA1522	-0.48	0.4	0
0	Immune cells	CD4Tconv	CD4Tconv	CKAP4	-0.49	0.9	0
0	Immune cells	CD4Tconv	CD4Tconv	CHP1	-0.49	8.2	0
0	Immune cells	CD4Tconv	CD4Tconv	RAB13	-0.49	0.7	0
0	Immune cells	CD4Tconv	CD4Tconv	SH3BGRL2	-0.5	0.3	0
0	Immune cells	CD4Tconv	CD4Tconv	CTBP2	-0.5	1.4	0
0	Immune cells	CD4Tconv	CD4Tconv	CTSS	-0.5	11.4	0
0	Immune cells	CD4Tconv	CD4Tconv	PDIA4	-0.5	10.1	0
0	Immune cells	CD4Tconv	CD4Tconv	ESRP1	-0.5	0.3	0
0	Immune cells	CD4Tconv	CD4Tconv	GAS6	-0.51	0.6	0
0	Immune cells	CD4Tconv	CD4Tconv	PLPP2	-0.51	0.7	0
0	Immune cells	CD4Tconv	CD4Tconv	CST3	-0.51	0.3	0
0	Immune cells	CD4Tconv	CD4Tconv	GMDS	-0.51	3.7	0
0	Immune cells	CD4Tconv	CD4Tconv	STAP2	-0.51	0.6	0
0	Immune cells	CD4Tconv	CD4Tconv	KLF3	-0.52	10.3	0
0	Immune cells	CD4Tconv	CD4Tconv	GFPT1	-0.52	9.5	0
0	Immune cells	CD4Tconv	CD4Tconv	CAPN5	-0.53	0.4	0
0	Immune cells	CD4Tconv	CD4Tconv	TMC4	-0.53	0.5	0
0	Immune cells	CD4Tconv	CD4Tconv	PYGB	-0.53	3.6	0
0	Immune cells	CD4Tconv	CD4Tconv	IL13RA1	-0.53	0.4	0
0	Immune cells	CD4Tconv	CD4Tconv	PFKL	-0.53	9.8	0
0	Immune cells	CD4Tconv	CD4Tconv	MAP7	-0.53	0.7	0
0	Immune cells	CD4Tconv	CD4Tconv	SLC22A18	-0.54	2.4	0
0	Immune cells	CD4Tconv	CD4Tconv	SHROOM3	-0.54	0.1	0
0	Immune cells	CD4Tconv	CD4Tconv	MYO1C	-0.54	3.7	0
0	Immune cells	CD4Tconv	CD4Tconv	MTUS1	-0.54	1.3	0
0	Immune cells	CD4Tconv	CD4Tconv	FBLIM1	-0.55	0.2	0
0	Immune cells	CD4Tconv	CD4Tconv	DDR1	-0.55	0.6	0
0	Immune cells	CD4Tconv	CD4Tconv	SDC1	-0.55	0.5	0
0	Immune cells	CD4Tconv	CD4Tconv	LGALS9	-0.56	5.3	0
0	Immune cells	CD4Tconv	CD4Tconv	CTTN	-0.56	0.8	0
0	Immune cells	CD4Tconv	CD4Tconv	MYO7B	-0.56	0.5	0
0	Immune cells	CD4Tconv	CD4Tconv	ACSS2	-0.56	0.9	0
0	Immune cells	CD4Tconv	CD4Tconv	PRDX4	-0.56	7.1	0
0	Immune cells	CD4Tconv	CD4Tconv	MYO6	-0.56	3.3	0
0	Immune cells	CD4Tconv	CD4Tconv	EPS8L2	-0.56	5.1	0
0	Immune cells	CD4Tconv	CD4Tconv	FUT3	-0.56	0.4	0
0	Immune cells	CD4Tconv	CD4Tconv	RAB25	-0.56	0.4	0
0	Immune cells	CD4Tconv	CD4Tconv	WASL	-0.57	3.5	0
0	Immune cells	CD4Tconv	CD4Tconv	GNG12	-0.57	0.4	0
0	Immune cells	CD4Tconv	CD4Tconv	FZD5	-0.57	0.9	0
0	Immune cells	CD4Tconv	CD4Tconv	NDUFB7	-0.57	30.4	0
0	Immune cells	CD4Tconv	CD4Tconv	ACADS	-0.57	2.9	0
0	Immune cells	CD4Tconv	CD4Tconv	SERPINB6	-0.57	4.7	0
0	Immune cells	CD4Tconv	CD4Tconv	HEPH	-0.57	0.3	0
0	Immune cells	CD4Tconv	CD4Tconv	UACA	-0.57	0.3	0
0	Immune cells	CD4Tconv	CD4Tconv	CYC1	-0.57	11.8	0
0	Immune cells	CD4Tconv	CD4Tconv	MGAT4B	-0.58	6.6	0
0	Immune cells	CD4Tconv	CD4Tconv	EFNB2	-0.58	3.5	0
0	Immune cells	CD4Tconv	CD4Tconv	HDLBP	-0.58	14.4	0
0	Immune cells	CD4Tconv	CD4Tconv	PARM1	-0.58	0.3	0
0	Immune cells	CD4Tconv	CD4Tconv	MAPK3	-0.58	5.2	0
0	Immune cells	CD4Tconv	CD4Tconv	S100A13	-0.58	1.8	0
0	Immune cells	CD4Tconv	CD4Tconv	CDC42BPA	-0.58	0.3	0
0	Immune cells	CD4Tconv	CD4Tconv	NR2F6	-0.58	1.9	0
0	Immune cells	CD4Tconv	CD4Tconv	BLVRB	-0.59	5	0
0	Immune cells	CD4Tconv	CD4Tconv	NANS	-0.59	8.9	0
0	Immune cells	CD4Tconv	CD4Tconv	TMEM45B	-0.6	0.3	0
0	Immune cells	CD4Tconv	CD4Tconv	PAPSS2	-0.6	0.3	0
0	Immune cells	CD4Tconv	CD4Tconv	AFDN	-0.6	5	0
0	Immune cells	CD4Tconv	CD4Tconv	USH1C	-0.6	0.3	0
0	Immune cells	CD4Tconv	CD4Tconv	PRDX5	-0.6	31.2	0
0	Immune cells	CD4Tconv	CD4Tconv	ACADVL	-0.6	14.4	0
0	Immune cells	CD4Tconv	CD4Tconv	CTNNA1	-0.6	6.7	0
0	Immune cells	CD4Tconv	CD4Tconv	TRPM4	-0.61	0.4	0
0	Immune cells	CD4Tconv	CD4Tconv	MYO1D	-0.61	1.9	0
0	Immune cells	CD4Tconv	CD4Tconv	MAOA	-0.61	0.5	0
0	Immune cells	CD4Tconv	CD4Tconv	BICDL2	-0.62	0.4	0
0	Immune cells	CD4Tconv	CD4Tconv	ANXA2	-0.62	25.8	0
0	Immune cells	CD4Tconv	CD4Tconv	ANXA4	-0.62	6.2	0
0	Immune cells	CD4Tconv	CD4Tconv	INF2	-0.62	1.6	0
0	Immune cells	CD4Tconv	CD4Tconv	SSFA2	-0.62	3.5	0
0	Immune cells	CD4Tconv	CD4Tconv	SPATS2L	-0.63	8.5	0
0	Immune cells	CD4Tconv	CD4Tconv	ABCC3	-0.63	0.6	0
0	Immune cells	CD4Tconv	CD4Tconv	CLMN	-0.63	0.4	0
0	Immune cells	CD4Tconv	CD4Tconv	TFCP2L1	-0.63	0.4	0
0	Immune cells	CD4Tconv	CD4Tconv	PLXNB2	-0.63	1.1	0
0	Immune cells	CD4Tconv	CD4Tconv	RASSF6	-0.63	0.2	0
0	Immune cells	CD4Tconv	CD4Tconv	NBL1	-0.63	6.1	0
0	Immune cells	CD4Tconv	CD4Tconv	DGAT1	-0.64	6.2	0
0	Immune cells	CD4Tconv	CD4Tconv	RALGPS2	-0.64	1.2	0
0	Immune cells	CD4Tconv	CD4Tconv	YBX3	-0.64	7.1	0
0	Immune cells	CD4Tconv	CD4Tconv	UQCRQ	-0.64	27.2	0
0	Immune cells	CD4Tconv	CD4Tconv	APLP2	-0.64	11.5	0
0	Immune cells	CD4Tconv	CD4Tconv	EHF	-0.64	0.4	0
0	Immune cells	CD4Tconv	CD4Tconv	RHOB	-0.64	14	0
0	Immune cells	CD4Tconv	CD4Tconv	DHRS11	-0.65	1	0
0	Immune cells	CD4Tconv	CD4Tconv	GGT6	-0.65	0.3	0
0	Immune cells	CD4Tconv	CD4Tconv	NRARP	-0.66	3.8	0
0	Immune cells	CD4Tconv	CD4Tconv	HNF4A	-0.66	0.5	0
0	Immune cells	CD4Tconv	CD4Tconv	POF1B	-0.66	0.2	0
0	Immune cells	CD4Tconv	CD4Tconv	ID3	-0.66	12.1	0
0	Immune cells	CD4Tconv	CD4Tconv	CYP3A5	-0.67	0.4	0
0	Immune cells	CD4Tconv	CD4Tconv	FKBP2	-0.67	21.6	0
0	Immune cells	CD4Tconv	CD4Tconv	TMPRSS4	-0.67	0.3	0
0	Immune cells	CD4Tconv	CD4Tconv	LIPH	-0.67	0.3	0
0	Immune cells	CD4Tconv	CD4Tconv	MAL2	-0.67	0.6	0
0	Immune cells	CD4Tconv	CD4Tconv	C2orf88	-0.68	0.5	0
0	Immune cells	CD4Tconv	CD4Tconv	VIL1	-0.68	1.3	0
0	Immune cells	CD4Tconv	CD4Tconv	LLGL2	-0.68	4	0
0	Immune cells	CD4Tconv	CD4Tconv	EPS8	-0.69	0.6	0
0	Immune cells	CD4Tconv	CD4Tconv	LSR	-0.69	5	0
0	Immune cells	CD4Tconv	CD4Tconv	LIMA1	-0.69	12.1	0
0	Immune cells	CD4Tconv	CD4Tconv	PKP3	-0.69	0.8	0
0	Immune cells	CD4Tconv	CD4Tconv	LAMB3	-0.69	0.4	0
0	Immune cells	CD4Tconv	CD4Tconv	EMP2	-0.69	0.5	0
0	Immune cells	CD4Tconv	CD4Tconv	MVP	-0.7	11.2	0
0	Immune cells	CD4Tconv	CD4Tconv	TCEA3	-0.7	0.8	0
0	Immune cells	CD4Tconv	CD4Tconv	EPS8L3	-0.7	0.5	0
0	Immune cells	CD4Tconv	CD4Tconv	SOX9	-0.7	0.9	0
0	Immune cells	CD4Tconv	CD4Tconv	ERN2	-0.7	0.4	0
0	Immune cells	CD4Tconv	CD4Tconv	INSR	-0.7	0.6	0
0	Immune cells	CD4Tconv	CD4Tconv	TP53I3	-0.7	0.6	0
0	Immune cells	CD4Tconv	CD4Tconv	EFNA1	-0.71	0.8	0
0	Immune cells	CD4Tconv	CD4Tconv	COX5B	-0.71	47.1	0
0	Immune cells	CD4Tconv	CD4Tconv	ASS1	-0.72	0.7	0
0	Immune cells	CD4Tconv	CD4Tconv	SCNN1A	-0.73	0.6	0
0	Immune cells	CD4Tconv	CD4Tconv	CGN	-0.73	0.5	0
0	Immune cells	CD4Tconv	CD4Tconv	SLC4A4	-0.74	0.9	0
0	Immune cells	CD4Tconv	CD4Tconv	TMEM238	-0.74	13.7	0
0	Immune cells	CD4Tconv	CD4Tconv	SPTBN1	-0.74	13.1	0
0	Immune cells	CD4Tconv	CD4Tconv	ETS2	-0.75	5.7	0
0	Immune cells	CD4Tconv	CD4Tconv	S100A16	-0.76	1	0
0	Immune cells	CD4Tconv	CD4Tconv	DSTN	-0.76	22.8	0
0	Immune cells	CD4Tconv	CD4Tconv	CTSZ	-0.77	14.4	0
0	Immune cells	CD4Tconv	CD4Tconv	AGR3	-0.78	0.4	0
0	Immune cells	CD4Tconv	CD4Tconv	H1F0	-0.78	1.1	0
0	Immune cells	CD4Tconv	CD4Tconv	HIST1H2BG	-0.79	3.4	0
0	Immune cells	CD4Tconv	CD4Tconv	ITGA6	-0.79	4.8	0
0	Immune cells	CD4Tconv	CD4Tconv	JUP	-0.79	0.8	0
0	Immune cells	CD4Tconv	CD4Tconv	NET1	-0.79	1.5	0
0	Immune cells	CD4Tconv	CD4Tconv	FAT1	-0.8	0.5	0
0	Immune cells	CD4Tconv	CD4Tconv	UQCRC1	-0.8	9.7	0
0	Immune cells	CD4Tconv	CD4Tconv	SMIM14	-0.8	3.6	0
0	Immune cells	CD4Tconv	CD4Tconv	GOLIM4	-0.81	2.9	0
0	Immune cells	CD4Tconv	CD4Tconv	VSIG2	-0.81	0.6	0
0	Immune cells	CD4Tconv	CD4Tconv	BSG	-0.81	24	0
0	Immune cells	CD4Tconv	CD4Tconv	CDX2	-0.82	0.6	0
0	Immune cells	CD4Tconv	CD4Tconv	RND3	-0.82	0.5	0
0	Immune cells	CD4Tconv	CD4Tconv	GSTP1	-0.82	33.6	0
0	Immune cells	CD4Tconv	CD4Tconv	MPST	-0.82	5.3	0
0	Immune cells	CD4Tconv	CD4Tconv	TMC5	-0.82	0.5	0
0	Immune cells	CD4Tconv	CD4Tconv	CDX1	-0.83	0.4	0
0	Immune cells	CD4Tconv	CD4Tconv	TSC22D1	-0.83	6.1	0
0	Immune cells	CD4Tconv	CD4Tconv	PKIB	-0.83	0.3	0
0	Immune cells	CD4Tconv	CD4Tconv	LMO7	-0.84	2.7	0
0	Immune cells	CD4Tconv	CD4Tconv	AC103702.2	-0.85	1.2	0
0	Immune cells	CD4Tconv	CD4Tconv	CTNND1	-0.85	1.6	0
0	Immune cells	CD4Tconv	CD4Tconv	PTPRF	-0.85	0.7	0
0	Immune cells	CD4Tconv	CD4Tconv	PSAP	-0.85	19.5	0
0	Immune cells	CD4Tconv	CD4Tconv	FLNB	-0.85	3.7	0
0	Immune cells	CD4Tconv	CD4Tconv	ALDH2	-0.85	0.8	0
0	Immune cells	CD4Tconv	CD4Tconv	TMPRSS2	-0.86	0.6	0
0	Immune cells	CD4Tconv	CD4Tconv	ATP8B1	-0.86	0.9	0
0	Immune cells	CD4Tconv	CD4Tconv	MTRNR2L12	-0.87	6.1	0
0	Immune cells	CD4Tconv	CD4Tconv	CHCHD10	-0.89	22	0
0	Immune cells	CD4Tconv	CD4Tconv	ST6GALNAC1	-0.9	0.6	0
0	Immune cells	CD4Tconv	CD4Tconv	MDK	-0.91	0.8	0
0	Immune cells	CD4Tconv	CD4Tconv	CD63	-0.91	42.5	0
0	Immune cells	CD4Tconv	CD4Tconv	RBM47	-0.91	0.7	0
0	Immune cells	CD4Tconv	CD4Tconv	TMEM176A	-0.92	0.6	0
0	Immune cells	CD4Tconv	CD4Tconv	CDH1	-0.92	0.8	0
0	Immune cells	CD4Tconv	CD4Tconv	MYH14	-0.92	0.7	0
0	Immune cells	CD4Tconv	CD4Tconv	PLS1	-0.93	0.7	0
0	Immune cells	CD4Tconv	CD4Tconv	MUC4	-0.94	0.5	0
0	Immune cells	CD4Tconv	CD4Tconv	TSPAN3	-0.94	6.4	0
0	Immune cells	CD4Tconv	CD4Tconv	SPINT1	-0.95	1.3	0
0	Immune cells	CD4Tconv	CD4Tconv	HMGCS2	-0.95	0.4	0
0	Immune cells	CD4Tconv	CD4Tconv	DSG2	-0.95	0.8	0
0	Immune cells	CD4Tconv	CD4Tconv	TCF7L2	-0.95	1.1	0
0	Immune cells	CD4Tconv	CD4Tconv	HSD11B2	-0.95	0.4	0
0	Immune cells	CD4Tconv	CD4Tconv	CA12	-0.96	0.9	0
0	Immune cells	CD4Tconv	CD4Tconv	APP	-0.96	3	0
0	Immune cells	CD4Tconv	CD4Tconv	VEGFA	-0.96	2.3	0
0	Immune cells	CD4Tconv	CD4Tconv	GOLM1	-0.96	0.8	0
0	Immune cells	CD4Tconv	CD4Tconv	PRSS8	-0.97	0.5	0
0	Immune cells	CD4Tconv	CD4Tconv	IFITM3	-0.97	2.7	0
0	Immune cells	CD4Tconv	CD4Tconv	AMN	-0.99	0.4	0
0	Immune cells	CD4Tconv	CD4Tconv	MGLL	-0.99	1.3	0
0	Immune cells	CD4Tconv	CD4Tconv	ATP1B1	-1	13.2	0
0	Immune cells	CD4Tconv	CD4Tconv	SERINC2	-1	0.8	0
0	Immune cells	CD4Tconv	CD4Tconv	GPRC5A	-1.01	0.7	0
0	Immune cells	CD4Tconv	CD4Tconv	IER3	-1.01	19.3	0
0	Immune cells	CD4Tconv	CD4Tconv	DSC2	-1.02	0.4	0
0	Immune cells	CD4Tconv	CD4Tconv	TMEM176B	-1.04	0.7	0
0	Immune cells	CD4Tconv	CD4Tconv	SDCBP2	-1.05	1	0
0	Immune cells	CD4Tconv	CD4Tconv	CEACAM6	-1.07	1.7	0
0	Immune cells	CD4Tconv	CD4Tconv	CES2	-1.08	4.1	0
0	Immune cells	CD4Tconv	CD4Tconv	CDH17	-1.08	1.2	0
0	Immune cells	CD4Tconv	CD4Tconv	ID1	-1.09	9	0
0	Immune cells	CD4Tconv	CD4Tconv	PDLIM1	-1.09	1.8	0
0	Immune cells	CD4Tconv	CD4Tconv	SFN	-1.1	1.2	0
0	Immune cells	CD4Tconv	CD4Tconv	GPX2	-1.11	2.3	0
0	Immune cells	CD4Tconv	CD4Tconv	GRN	-1.13	5.3	0
0	Immune cells	CD4Tconv	CD4Tconv	TST	-1.14	1.3	0
0	Immune cells	CD4Tconv	CD4Tconv	KLF5	-1.14	2.1	0
0	Immune cells	CD4Tconv	CD4Tconv	C10orf99	-1.14	0.5	0
0	Immune cells	CD4Tconv	CD4Tconv	SPINK1	-1.15	1.3	0
0	Immune cells	CD4Tconv	CD4Tconv	ST14	-1.15	1	0
0	Immune cells	CD4Tconv	CD4Tconv	DST	-1.16	0.9	0
0	Immune cells	CD4Tconv	CD4Tconv	SLC44A4	-1.18	1	0
0	Immune cells	CD4Tconv	CD4Tconv	AOC1	-1.18	0.4	0
0	Immune cells	CD4Tconv	CD4Tconv	LGALS3BP	-1.2	4.7	0
0	Immune cells	CD4Tconv	CD4Tconv	FCGRT	-1.22	3.1	0
0	Immune cells	CD4Tconv	CD4Tconv	DSP	-1.22	1	0
0	Immune cells	CD4Tconv	CD4Tconv	ADIRF	-1.23	1	0
0	Immune cells	CD4Tconv	CD4Tconv	S100A14	-1.23	1.5	0
0	Immune cells	CD4Tconv	CD4Tconv	RRBP1	-1.24	8.4	0
0	Immune cells	CD4Tconv	CD4Tconv	PRSS3	-1.26	0.8	0
0	Immune cells	CD4Tconv	CD4Tconv	TPM1	-1.27	3.3	0
0	Immune cells	CD4Tconv	CD4Tconv	ITM2C	-1.27	20.4	0
0	Immune cells	CD4Tconv	CD4Tconv	MISP	-1.28	0.8	0
0	Immune cells	CD4Tconv	CD4Tconv	CAMK2N1	-1.28	5.1	0
0	Immune cells	CD4Tconv	CD4Tconv	GPA33	-1.29	1.1	0
0	Immune cells	CD4Tconv	CD4Tconv	KLF4	-1.32	4	0
0	Immune cells	CD4Tconv	CD4Tconv	MUC13	-1.34	1.6	0
0	Immune cells	CD4Tconv	CD4Tconv	SOX4	-1.37	7.1	0
0	Immune cells	CD4Tconv	CD4Tconv	PCK1	-1.37	0.7	0
0	Immune cells	CD4Tconv	CD4Tconv	CD24	-1.4	2.7	0
0	Immune cells	CD4Tconv	CD4Tconv	CD9	-1.41	5.3	0
0	Immune cells	CD4Tconv	CD4Tconv	CDC42EP5	-1.45	0.9	0
0	Immune cells	CD4Tconv	CD4Tconv	SELENBP1	-1.45	1.5	0
0	Immune cells	CD4Tconv	CD4Tconv	HES1	-1.53	3	0
0	Immune cells	CD4Tconv	CD4Tconv	MARCKS	-1.55	1.8	0
0	Immune cells	CD4Tconv	CD4Tconv	CDHR5	-1.57	1.2	0
0	Immune cells	CD4Tconv	CD4Tconv	S100A6	-1.57	83.5	0
0	Immune cells	CD4Tconv	CD4Tconv	LGALS3	-1.59	35.5	0
0	Immune cells	CD4Tconv	CD4Tconv	MT1E	-1.59	6.4	0
0	Immune cells	CD4Tconv	CD4Tconv	SMIM22	-1.61	1.2	0
0	Immune cells	CD4Tconv	CD4Tconv	CA2	-1.62	3.3	0
0	Immune cells	CD4Tconv	CD4Tconv	MUC12	-1.62	2.1	0
0	Immune cells	CD4Tconv	CD4Tconv	TMEM54	-1.66	1.2	0
0	Immune cells	CD4Tconv	CD4Tconv	GSN	-1.66	2.3	0
0	Immune cells	CD4Tconv	CD4Tconv	FAM3D	-1.67	1.2	0
0	Immune cells	CD4Tconv	CD4Tconv	CEACAM7	-1.78	0.6	0
0	Immune cells	CD4Tconv	CD4Tconv	EPCAM	-1.81	2.3	0
0	Immune cells	CD4Tconv	CD4Tconv	KRT20	-1.85	1.1	0
0	Immune cells	CD4Tconv	CD4Tconv	SELENOP	-1.86	1.5	0
0	Immune cells	CD4Tconv	CD4Tconv	TSPAN8	-1.98	2.8	0
0	Immune cells	CD4Tconv	CD4Tconv	ELF3	-1.98	3.6	0
0	Immune cells	CD4Tconv	CD4Tconv	AGR2	-2.04	3.9	0
0	Immune cells	CD4Tconv	CD4Tconv	TSPAN1	-2.05	1.8	0
0	Immune cells	CD4Tconv	CD4Tconv	CLDN3	-2.07	2.1	0
0	Immune cells	CD4Tconv	CD4Tconv	CLDN4	-2.14	3.3	0
0	Immune cells	CD4Tconv	CD4Tconv	SLC26A3	-2.26	1.7	0
0	Immune cells	CD4Tconv	CD4Tconv	CKB	-2.33	4.3	0
0	Immune cells	CD4Tconv	CD4Tconv	KRT18	-2.38	9	0
0	Immune cells	CD4Tconv	CD4Tconv	MT1G	-2.46	2	0
0	Immune cells	CD4Tconv	CD4Tconv	FXYD3	-2.54	4.6	0
0	Immune cells	CD4Tconv	CD4Tconv	KRT19	-2.54	4	0
0	Immune cells	CD4Tconv	CD4Tconv	IFI27	-2.63	3.9	0
0	Immune cells	CD4Tconv	CD4Tconv	KRT8	-2.69	5.6	0
0	Immune cells	CD4Tconv	CD4Tconv	LGALS4	-2.71	5.2	0
0	Immune cells	CD4Tconv	CD4Tconv	FCGBP	-3	3.4	0
0	Immune cells	CD4Tconv	CD4Tconv	TFF3	-3.09	7.6	0
0	Immune cells	CD4Tconv	CD4Tconv	PIGR	-3.17	7.8	0
0	Immune cells	CD4Tconv	CD4Tconv	FABP1	-3.42	8.6	0
0	Immune cells	CD4Tconv	CD4Tconv	PHGR1	-4.03	11.6	0
0	Immune cells	CD4Tconv	CD4Tconv	GUCA2A	-2.47	0.9	1.99e-306
0	Immune cells	CD4Tconv	CD4Tconv	JCHAIN	-3.67	24	3.15e-306
0	Immune cells	CD4Tconv	CD4Tconv	SOCS1	0.65	43.2	3.36e-306
0	Immune cells	CD4Tconv	CD4Tconv	LTBR	-0.43	0.4	4.26e-305
0	Immune cells	CD4Tconv	CD4Tconv	ISOC2	-0.37	4.5	9.8e-305
0	Immune cells	CD4Tconv	CD4Tconv	GYPC	0.68	42	1.33e-303
0	Immune cells	CD4Tconv	CD4Tconv	PRF1	0.43	13.5	9.53e-303
0	Immune cells	CD4Tconv	CD4Tconv	PPP1R16A	-0.48	1.1	9.97e-303
0	Immune cells	CD4Tconv	CD4Tconv	LINC01934	0.49	14.1	6.52e-302
0	Immune cells	CD4Tconv	CD4Tconv	SEPT6	0.62	29.4	9.27e-302
0	Immune cells	CD4Tconv	CD4Tconv	NEDD4L	-0.53	0.5	1.18e-301
0	Immune cells	CD4Tconv	CD4Tconv	GNA11	-0.51	0.3	1.24e-301
0	Immune cells	CD4Tconv	CD4Tconv	MUC3A	-0.51	0.2	2.96e-301
0	Immune cells	CD4Tconv	CD4Tconv	H2AFJ	-0.51	12.7	6.38e-301
0	Immune cells	CD4Tconv	CD4Tconv	TRIM2	-0.49	0.7	1.49e-300
0	Immune cells	CD4Tconv	CD4Tconv	CCDC68	-0.59	0.2	3.32e-300
0	Immune cells	CD4Tconv	CD4Tconv	NUPR1	-0.9	0.5	1.23e-299
0	Immune cells	CD4Tconv	CD4Tconv	C1orf21	-0.48	3.2	3.61e-299
0	Immune cells	CD4Tconv	CD4Tconv	PHLDA1	0.69	33.5	1.33e-298
0	Immune cells	CD4Tconv	CD4Tconv	ARL14	-0.77	0.4	1.47e-298
0	Immune cells	CD4Tconv	CD4Tconv	DUSP1	0.5	80.5	1.63e-298
0	Immune cells	CD4Tconv	CD4Tconv	ROCK2	-0.44	8.7	8.66e-298
0	Immune cells	CD4Tconv	CD4Tconv	DERL3	-0.65	0.6	9.77e-298
0	Immune cells	CD4Tconv	CD4Tconv	UGDH	-0.45	2.9	1.74e-297
0	Immune cells	CD4Tconv	CD4Tconv	XBP1	-0.63	24.4	2.39e-297
0	Immune cells	CD4Tconv	CD4Tconv	ABHD11	-0.45	1.3	7.18e-297
0	Immune cells	CD4Tconv	CD4Tconv	RPS5	0.27	96.3	1.68e-296
0	Immune cells	CD4Tconv	CD4Tconv	ARL6IP5	0.7	46.7	3.58e-295
0	Immune cells	CD4Tconv	CD4Tconv	ABHD17C	-0.47	0.8	4.12e-295
0	Immune cells	CD4Tconv	CD4Tconv	MYO10	-0.47	0.3	1.09e-294
0	Immune cells	CD4Tconv	CD4Tconv	EEF1B2	0.33	88.9	1.32e-294
0	Immune cells	CD4Tconv	CD4Tconv	PRR15L	-0.47	0.3	1.8e-294
0	Immune cells	CD4Tconv	CD4Tconv	PADI2	-0.57	0.2	2.24e-294
0	Immune cells	CD4Tconv	CD4Tconv	GALNT3	-0.46	1.9	5.37e-294
0	Immune cells	CD4Tconv	CD4Tconv	CD79A	-0.74	2.1	1.22e-293
0	Immune cells	CD4Tconv	CD4Tconv	CA1	-1.98	0.8	8.24e-293
0	Immune cells	CD4Tconv	CD4Tconv	PSMB9	0.68	50.6	1.04e-292
0	Immune cells	CD4Tconv	CD4Tconv	PPIC	-0.45	0.2	4.04e-292
0	Immune cells	CD4Tconv	CD4Tconv	CHMP4B	-0.42	12.6	6.79e-292
0	Immune cells	CD4Tconv	CD4Tconv	TPRN	-0.54	1.3	1.04e-291
0	Immune cells	CD4Tconv	CD4Tconv	CRTAM	0.64	10.5	1.72e-291
0	Immune cells	CD4Tconv	CD4Tconv	PPP1R1B	-0.56	0.5	2.06e-291
0	Immune cells	CD4Tconv	CD4Tconv	ETHE1	-0.68	13.1	3.61e-291
0	Immune cells	CD4Tconv	CD4Tconv	SLC12A2	-0.8	6.9	9.66e-291
0	Immune cells	CD4Tconv	CD4Tconv	MGST2	-0.42	2.4	3.03e-290
0	Immune cells	CD4Tconv	CD4Tconv	TJP3	-0.53	0.8	1.99e-289
0	Immune cells	CD4Tconv	CD4Tconv	MT1M	-1.07	0.2	2.46e-289
0	Immune cells	CD4Tconv	CD4Tconv	TLCD2	-0.53	1.4	3.18e-289
0	Immune cells	CD4Tconv	CD4Tconv	NXPE1	-0.69	0.2	3.2e-289
0	Immune cells	CD4Tconv	CD4Tconv	FRYL	-0.58	15.5	3.55e-289
0	Immune cells	CD4Tconv	CD4Tconv	CD2AP	-0.46	11.3	9.89e-289
0	Immune cells	CD4Tconv	CD4Tconv	PPP1R14D	-0.54	0.2	9.33e-288
0	Immune cells	CD4Tconv	CD4Tconv	TCIM	-0.97	0.5	9.6e-288
0	Immune cells	CD4Tconv	CD4Tconv	RPL27A	0.3	94.7	1.81e-287
0	Immune cells	CD4Tconv	CD4Tconv	TIMM13	-0.39	12.2	1.97e-287
0	Immune cells	CD4Tconv	CD4Tconv	TM9SF3	-0.42	20.9	7.14e-287
0	Immune cells	CD4Tconv	CD4Tconv	MARCKSL1	-0.55	17.6	3.67e-286
0	Immune cells	CD4Tconv	CD4Tconv	SUB1	0.46	72.2	4.16e-286
0	Immune cells	CD4Tconv	CD4Tconv	MUC2	-2.85	3.3	1.01e-285
0	Immune cells	CD4Tconv	CD4Tconv	SLAMF1	0.42	13.2	1.06e-285
0	Immune cells	CD4Tconv	CD4Tconv	MCRIP2	-0.38	5.1	1.1e-285
0	Immune cells	CD4Tconv	CD4Tconv	SEC61A1	-0.29	9.7	1.65e-285
0	Immune cells	CD4Tconv	CD4Tconv	MLXIP	-0.44	12	1.65e-285
0	Immune cells	CD4Tconv	CD4Tconv	ZG16	-3.6	3.7	2.79e-285
0	Immune cells	CD4Tconv	CD4Tconv	NAP1L1	0.52	62.6	5.41e-285
0	Immune cells	CD4Tconv	CD4Tconv	RASSF7	-0.49	5.8	2.46e-284
0	Immune cells	CD4Tconv	CD4Tconv	GALNT12	-0.5	1.4	2.8e-284
0	Immune cells	CD4Tconv	CD4Tconv	PKP2	-0.44	0.5	6.75e-284
0	Immune cells	CD4Tconv	CD4Tconv	HDHD3	-0.45	2.9	9.03e-284
0	Immune cells	CD4Tconv	CD4Tconv	ARHGAP21	-0.39	2	1.32e-283
0	Immune cells	CD4Tconv	CD4Tconv	CAMK4	0.33	10.2	1.82e-283
0	Immune cells	CD4Tconv	CD4Tconv	SIL1	-0.28	3.9	2.4e-283
0	Immune cells	CD4Tconv	CD4Tconv	TIMP2	-0.58	1.9	2.8e-283
0	Immune cells	CD4Tconv	CD4Tconv	ARHGAP9	0.52	21.2	9.62e-283
0	Immune cells	CD4Tconv	CD4Tconv	HCLS1	0.61	36.1	1.55e-282
0	Immune cells	CD4Tconv	CD4Tconv	NXPE4	-0.67	0.3	4.39e-282
0	Immune cells	CD4Tconv	CD4Tconv	GALNT7	-0.48	4.9	7.07e-282
0	Immune cells	CD4Tconv	CD4Tconv	FUCA1	-0.48	3.3	1.96e-281
0	Immune cells	CD4Tconv	CD4Tconv	AKR1A1	-0.26	8.1	2.09e-281
0	Immune cells	CD4Tconv	CD4Tconv	MIR194-2HG	-0.69	2	7.38e-281
0	Immune cells	CD4Tconv	CD4Tconv	RPL38	0.35	86.3	7.2e-280
0	Immune cells	CD4Tconv	CD4Tconv	TSPAN13	-0.41	1.9	8.84e-280
0	Immune cells	CD4Tconv	CD4Tconv	AKNA	0.64	30.7	2.46e-279
0	Immune cells	CD4Tconv	CD4Tconv	ENTPD8	-0.73	0.3	3.33e-279
0	Immune cells	CD4Tconv	CD4Tconv	PLCE1	-0.59	2	4.26e-279
0	Immune cells	CD4Tconv	CD4Tconv	TINAGL1	-0.48	0.4	6.1e-279
0	Immune cells	CD4Tconv	CD4Tconv	HOXB7	-0.42	0.5	2.24e-278
0	Immune cells	CD4Tconv	CD4Tconv	LEPROTL1	0.5	18.4	8.41e-278
0	Immune cells	CD4Tconv	CD4Tconv	SULT1B1	-0.58	0.4	3.21e-277
0	Immune cells	CD4Tconv	CD4Tconv	HK2	-0.5	0.9	4.08e-277
0	Immune cells	CD4Tconv	CD4Tconv	SATB2	-0.45	0.3	6.15e-277
0	Immune cells	CD4Tconv	CD4Tconv	SERPINA1	-0.87	0.9	9.17e-277
0	Immune cells	CD4Tconv	CD4Tconv	IGF2BP2	-0.43	0.4	1.52e-276
0	Immune cells	CD4Tconv	CD4Tconv	HIST1H1C	-0.7	12.5	5.51e-276
0	Immune cells	CD4Tconv	CD4Tconv	RNF125	0.61	23.3	8.22e-276
0	Immune cells	CD4Tconv	CD4Tconv	SULT1A1	-0.5	0.7	1.05e-275
0	Immune cells	CD4Tconv	CD4Tconv	SRSF2	0.56	66.6	6.27e-275
0	Immune cells	CD4Tconv	CD4Tconv	TNFRSF17	-0.59	0.3	2.99e-273
0	Immune cells	CD4Tconv	CD4Tconv	RABL6	-0.4	10.1	5.94e-273
0	Immune cells	CD4Tconv	CD4Tconv	PTK6	-0.47	0.6	6.5e-273
0	Immune cells	CD4Tconv	CD4Tconv	SRSF7	0.62	62	3.59e-272
0	Immune cells	CD4Tconv	CD4Tconv	TESPA1	0.3	10.8	3.55e-271
0	Immune cells	CD4Tconv	CD4Tconv	C15orf48	-0.5	0.2	2.24e-270
0	Immune cells	CD4Tconv	CD4Tconv	BAIAP2L1	-0.46	0.6	6.96e-270
0	Immune cells	CD4Tconv	CD4Tconv	PON2	-0.38	1.8	8.12e-270
0	Immune cells	CD4Tconv	CD4Tconv	APOBEC3G	0.64	22.2	7.94e-269
0	Immune cells	CD4Tconv	CD4Tconv	AKR1C3	-0.52	0.8	8.23e-269
0	Immune cells	CD4Tconv	CD4Tconv	NFKBIA	0.54	69.3	1.03e-268
0	Immune cells	CD4Tconv	CD4Tconv	NCKAP1	-0.4	1.4	1.48e-268
0	Immune cells	CD4Tconv	CD4Tconv	PLA2G10	-0.53	0.1	1.56e-268
0	Immune cells	CD4Tconv	CD4Tconv	UBE2J1	-0.35	13	4.27e-268
0	Immune cells	CD4Tconv	CD4Tconv	FAM213A	-0.41	0.9	5.15e-268
0	Immune cells	CD4Tconv	CD4Tconv	PHLDA2	-0.59	6.8	5.39e-268
0	Immune cells	CD4Tconv	CD4Tconv	PLA2G2A	-1.28	1.3	5.59e-268
0	Immune cells	CD4Tconv	CD4Tconv	ASAP2	-0.41	0.2	1.44e-267
0	Immune cells	CD4Tconv	CD4Tconv	ETFB	-0.39	20.7	2.47e-267
0	Immune cells	CD4Tconv	CD4Tconv	MPZL1	-0.32	1.2	2.8e-267
0	Immune cells	CD4Tconv	CD4Tconv	LAYN	0.44	10.7	8.6e-267
0	Immune cells	CD4Tconv	CD4Tconv	CDC42BPB	-0.38	0.5	1.5e-266
0	Immune cells	CD4Tconv	CD4Tconv	IL18	-0.44	0.6	1.8e-266
0	Immune cells	CD4Tconv	CD4Tconv	BHLHE41	-0.38	0.3	1.45e-265
0	Immune cells	CD4Tconv	CD4Tconv	GLUL	-0.65	9.4	2.14e-265
0	Immune cells	CD4Tconv	CD4Tconv	OAF	-0.37	0.4	5.03e-265
0	Immune cells	CD4Tconv	CD4Tconv	NEAT1	-0.69	93.3	5.07e-265
0	Immune cells	CD4Tconv	CD4Tconv	GAB1	-0.31	0.3	7.79e-265
0	Immune cells	CD4Tconv	CD4Tconv	SLA2	0.37	11.2	1.62e-264
0	Immune cells	CD4Tconv	CD4Tconv	ARHGAP32	-0.41	0.4	4.45e-264
0	Immune cells	CD4Tconv	CD4Tconv	CLRN3	-0.44	0.3	7.3e-264
0	Immune cells	CD4Tconv	CD4Tconv	CCDC50	-0.29	7.7	1.03e-263
0	Immune cells	CD4Tconv	CD4Tconv	ACTN1	-0.45	1.8	1.36e-263
0	Immune cells	CD4Tconv	CD4Tconv	S100P	-0.86	2.2	1.36e-263
0	Immune cells	CD4Tconv	CD4Tconv	FAM114A1	-0.36	0.2	1.64e-263
0	Immune cells	CD4Tconv	CD4Tconv	GZMH	0.52	10.8	1.84e-263
0	Immune cells	CD4Tconv	CD4Tconv	PDK4	-0.61	0.3	1.9e-263
0	Immune cells	CD4Tconv	CD4Tconv	FMNL1	0.55	23.8	4e-263
0	Immune cells	CD4Tconv	CD4Tconv	FNBP1L	-0.39	0.3	1.15e-262
0	Immune cells	CD4Tconv	CD4Tconv	CRACR2B	-0.43	0.9	1.62e-262
0	Immune cells	CD4Tconv	CD4Tconv	PREX1	0.54	24.4	1.67e-262
0	Immune cells	CD4Tconv	CD4Tconv	ZKSCAN1	-0.49	11.5	1.8e-262
0	Immune cells	CD4Tconv	CD4Tconv	PDCD6IP	-0.43	12.3	7.89e-262
0	Immune cells	CD4Tconv	CD4Tconv	RASSF5	0.56	25.8	2.82e-261
0	Immune cells	CD4Tconv	CD4Tconv	RNPEP	-0.36	3.5	2.95e-261
0	Immune cells	CD4Tconv	CD4Tconv	KCNK6	-0.39	6.2	2.98e-261
0	Immune cells	CD4Tconv	CD4Tconv	MYADM	0.76	50.7	4.91e-261
0	Immune cells	CD4Tconv	CD4Tconv	NT5C	-0.4	13.7	7.08e-261
0	Immune cells	CD4Tconv	CD4Tconv	EMP3	0.67	46.6	7.96e-261
0	Immune cells	CD4Tconv	CD4Tconv	PRR15	-0.45	0.4	9.87e-261
0	Immune cells	CD4Tconv	CD4Tconv	DOCK8	0.58	28.3	1.77e-260
0	Immune cells	CD4Tconv	CD4Tconv	SRI	-0.74	30.4	4.05e-260
0	Immune cells	CD4Tconv	CD4Tconv	TJP1	-0.41	0.2	4.99e-260
0	Immune cells	CD4Tconv	CD4Tconv	FGD4	-0.37	0.2	5.84e-260
0	Immune cells	CD4Tconv	CD4Tconv	IGFBP2	-0.69	1.3	6.17e-260
0	Immune cells	CD4Tconv	CD4Tconv	CMTM3	0.48	19	2.14e-259
0	Immune cells	CD4Tconv	CD4Tconv	SLC6A8	-0.57	1.9	3.33e-259
0	Immune cells	CD4Tconv	CD4Tconv	SLC39A7	-0.27	7.1	4.08e-259
0	Immune cells	CD4Tconv	CD4Tconv	TDP2	-0.52	7.6	7.32e-259
0	Immune cells	CD4Tconv	CD4Tconv	HSP90B1	-0.55	34.3	7.53e-259
0	Immune cells	CD4Tconv	CD4Tconv	F11R	-0.4	2.4	1.31e-258
0	Immune cells	CD4Tconv	CD4Tconv	PPP1R18	0.56	25.4	3.53e-258
0	Immune cells	CD4Tconv	CD4Tconv	MEF2C	-0.4	0.5	3.7e-258
0	Immune cells	CD4Tconv	CD4Tconv	TCF4	-0.57	1	5.59e-258
0	Immune cells	CD4Tconv	CD4Tconv	SLC25A1	-0.37	6.3	1.11e-257
0	Immune cells	CD4Tconv	CD4Tconv	DDAH2	-0.4	7	2.75e-257
0	Immune cells	CD4Tconv	CD4Tconv	SIPA1L2	-0.46	1.1	3.23e-257
0	Immune cells	CD4Tconv	CD4Tconv	ERGIC3	-0.25	7.2	3.99e-257
0	Immune cells	CD4Tconv	CD4Tconv	EVI5	-0.31	0.5	8.8e-257
0	Immune cells	CD4Tconv	CD4Tconv	FABP2	-0.54	0.1	4.2e-256
0	Immune cells	CD4Tconv	CD4Tconv	LRP1	-0.45	0.5	1.49e-255
0	Immune cells	CD4Tconv	CD4Tconv	GBP2	0.65	33.2	1.73e-255
0	Immune cells	CD4Tconv	CD4Tconv	SYK	-0.34	0.5	1.81e-255
0	Immune cells	CD4Tconv	CD4Tconv	LGALS2	-0.66	0.3	2.01e-254
0	Immune cells	CD4Tconv	CD4Tconv	CEACAM1	-0.96	1.9	3.51e-254
0	Immune cells	CD4Tconv	CD4Tconv	RNF19A	0.77	39.3	4.72e-254
0	Immune cells	CD4Tconv	CD4Tconv	CERS6	-0.39	2.5	7.59e-254
0	Immune cells	CD4Tconv	CD4Tconv	CTSW	0.55	17.4	1.47e-253
0	Immune cells	CD4Tconv	CD4Tconv	KLK1	-0.96	0.6	1.51e-253
0	Immune cells	CD4Tconv	CD4Tconv	GPRIN3	0.63	33.9	1.95e-253
0	Immune cells	CD4Tconv	CD4Tconv	AURKAIP1	-0.36	28.4	5.12e-253
0	Immune cells	CD4Tconv	CD4Tconv	LGMN	-0.48	1.7	5.54e-253
0	Immune cells	CD4Tconv	CD4Tconv	AC023157.3	-0.72	3.1	1.91e-252
0	Immune cells	CD4Tconv	CD4Tconv	SH3RF1	-0.39	0.1	3.07e-252
0	Immune cells	CD4Tconv	CD4Tconv	PKN2	-0.38	14.8	5.18e-252
0	Immune cells	CD4Tconv	CD4Tconv	UCP2	0.67	31.7	1.3e-251
0	Immune cells	CD4Tconv	CD4Tconv	TM9SF2	-0.28	12.9	1.75e-251
0	Immune cells	CD4Tconv	CD4Tconv	ARHGEF11	-0.43	0.2	6.49e-251
0	Immune cells	CD4Tconv	CD4Tconv	NFIB	-0.46	0.2	2.03e-250
0	Immune cells	CD4Tconv	CD4Tconv	FERMT1	-0.46	0.6	4.26e-250
0	Immune cells	CD4Tconv	CD4Tconv	SHROOM1	-0.46	0.3	5.19e-250
0	Immune cells	CD4Tconv	CD4Tconv	CYFIP1	-0.35	2.6	1.17e-249
0	Immune cells	CD4Tconv	CD4Tconv	QSOX1	-0.44	4.4	6.29e-249
0	Immune cells	CD4Tconv	CD4Tconv	SEMA3B	-0.47	0.5	1.6e-248
0	Immune cells	CD4Tconv	CD4Tconv	PDGFA	-0.47	1.3	1.75e-248
0	Immune cells	CD4Tconv	CD4Tconv	MEP1A	-0.6	0.1	1.02e-247
0	Immune cells	CD4Tconv	CD4Tconv	RETSAT	-0.46	3.2	1.79e-247
0	Immune cells	CD4Tconv	CD4Tconv	ATP5F1E	0.31	92	2.05e-247
0	Immune cells	CD4Tconv	CD4Tconv	FHL2	-0.43	0.7	4.15e-247
0	Immune cells	CD4Tconv	CD4Tconv	TXN	-0.65	46.1	8.01e-247
0	Immune cells	CD4Tconv	CD4Tconv	NDUFV3	-0.29	4.5	1.01e-245
0	Immune cells	CD4Tconv	CD4Tconv	MLEC	-0.34	11.4	1.08e-245
0	Immune cells	CD4Tconv	CD4Tconv	STK10	0.58	26.1	2e-245
0	Immune cells	CD4Tconv	CD4Tconv	BACE2	-0.43	0.5	2.09e-245
0	Immune cells	CD4Tconv	CD4Tconv	RNASE1	-0.82	0.7	2.54e-245
0	Immune cells	CD4Tconv	CD4Tconv	CANX	-0.29	20.2	4.89e-245
0	Immune cells	CD4Tconv	CD4Tconv	QPRT	-0.33	1.3	6.43e-245
0	Immune cells	CD4Tconv	CD4Tconv	ATP5F1D	-0.47	40.4	6.97e-245
0	Immune cells	CD4Tconv	CD4Tconv	LGR4	-0.4	0.5	8.79e-245
0	Immune cells	CD4Tconv	CD4Tconv	G3BP2	0.73	47.6	5.35e-244
0	Immune cells	CD4Tconv	CD4Tconv	PLSCR1	-0.38	5.6	6.8e-244
0	Immune cells	CD4Tconv	CD4Tconv	ZNF703	-0.4	2.2	1.03e-243
0	Immune cells	CD4Tconv	CD4Tconv	UGT2B17	-0.9	0.4	1.93e-243
0	Immune cells	CD4Tconv	CD4Tconv	PAWR	-0.38	0.5	6.28e-243
0	Immune cells	CD4Tconv	CD4Tconv	SMPDL3A	-0.52	0.3	6.36e-243
0	Immune cells	CD4Tconv	CD4Tconv	CFDP1	-0.52	9.3	4.41e-242
0	Immune cells	CD4Tconv	CD4Tconv	USP53	-0.44	8.2	4.68e-242
0	Immune cells	CD4Tconv	CD4Tconv	SLC40A1	-0.59	1.6	1.07e-241
0	Immune cells	CD4Tconv	CD4Tconv	ARHGEF16	-0.41	0.2	1.73e-241
0	Immune cells	CD4Tconv	CD4Tconv	DYNC1LI2	-0.33	10.4	1.77e-241
0	Immune cells	CD4Tconv	CD4Tconv	NDUFB10	-0.3	14.8	6.98e-241
0	Immune cells	CD4Tconv	CD4Tconv	PLCD3	-0.44	0.3	1.64e-240
0	Immune cells	CD4Tconv	CD4Tconv	ADM	-0.51	1.5	1.99e-240
0	Immune cells	CD4Tconv	CD4Tconv	CYB5A	-0.35	8.4	3.5e-240
0	Immune cells	CD4Tconv	CD4Tconv	PPP1R2	0.73	44.8	4.82e-240
0	Immune cells	CD4Tconv	CD4Tconv	BASP1	-0.55	2.1	6.52e-240
0	Immune cells	CD4Tconv	CD4Tconv	MZB1	-1.35	6	6.52e-240
0	Immune cells	CD4Tconv	CD4Tconv	CCNI	0.44	71.9	1.1e-239
0	Immune cells	CD4Tconv	CD4Tconv	MS4A12	-1.02	0.3	2.78e-239
0	Immune cells	CD4Tconv	CD4Tconv	TNFRSF1A	-0.38	4.4	3.66e-239
0	Immune cells	CD4Tconv	CD4Tconv	IGHA1	-3.54	34.7	1.21e-238
0	Immune cells	CD4Tconv	CD4Tconv	AC016831.7	0.58	23.7	4.39e-238
0	Immune cells	CD4Tconv	CD4Tconv	ADAP1	-0.38	2.1	5.69e-238
0	Immune cells	CD4Tconv	CD4Tconv	VILL	-0.43	2.2	7.89e-238
0	Immune cells	CD4Tconv	CD4Tconv	CD99	0.61	50.1	1.44e-237
0	Immune cells	CD4Tconv	CD4Tconv	FAM107B	0.69	49.2	2.82e-237
0	Immune cells	CD4Tconv	CD4Tconv	ERGIC1	-0.27	7.7	2.96e-237
0	Immune cells	CD4Tconv	CD4Tconv	CHP2	-0.52	0.1	1.45e-236
0	Immune cells	CD4Tconv	CD4Tconv	S1PR4	0.45	16.1	3.07e-236
0	Immune cells	CD4Tconv	CD4Tconv	TRAF3IP3	0.42	16.1	1.15e-235
0	Immune cells	CD4Tconv	CD4Tconv	GDF15	-0.63	0.8	1.51e-235
0	Immune cells	CD4Tconv	CD4Tconv	MYO1E	-0.36	1.3	2.13e-235
0	Immune cells	CD4Tconv	CD4Tconv	ATOX1	-0.25	14.5	7.53e-235
0	Immune cells	CD4Tconv	CD4Tconv	IMPA2	-0.34	0.9	1.14e-234
0	Immune cells	CD4Tconv	CD4Tconv	CDCP1	-0.36	0.2	1.53e-234
0	Immune cells	CD4Tconv	CD4Tconv	SRGAP1	-0.38	0.7	4.12e-234
0	Immune cells	CD4Tconv	CD4Tconv	RAB32	-0.33	0.6	5.21e-234
0	Immune cells	CD4Tconv	CD4Tconv	SLC25A25-AS1	-0.41	1.5	1.08e-233
0	Immune cells	CD4Tconv	CD4Tconv	ATP10B	-0.4	0.4	1.21e-233
0	Immune cells	CD4Tconv	CD4Tconv	CCND1	-0.45	2	1.42e-233
0	Immune cells	CD4Tconv	CD4Tconv	MBNL1	0.61	54	1.63e-233
0	Immune cells	CD4Tconv	CD4Tconv	ANPEP	-0.99	0.4	1.89e-233
0	Immune cells	CD4Tconv	CD4Tconv	RASD1	-0.59	4.1	3.46e-233
0	Immune cells	CD4Tconv	CD4Tconv	LCN2	-1.3	3.4	4.32e-233
0	Immune cells	CD4Tconv	CD4Tconv	CES3	-0.44	0.2	5.35e-233
0	Immune cells	CD4Tconv	CD4Tconv	UQCRB	0.38	79.2	5.62e-233
0	Immune cells	CD4Tconv	CD4Tconv	IGFBP4	-0.57	3.3	1.23e-232
0	Immune cells	CD4Tconv	CD4Tconv	RARRES1	-0.44	0.2	5.52e-232
0	Immune cells	CD4Tconv	CD4Tconv	RAC1	-0.42	34.9	6.51e-232
0	Immune cells	CD4Tconv	CD4Tconv	EMP1	-0.69	0.9	9.93e-232
0	Immune cells	CD4Tconv	CD4Tconv	PLCB4	-0.48	0.4	3.39e-231
0	Immune cells	CD4Tconv	CD4Tconv	NR3C1	0.62	26.7	4.16e-231
0	Immune cells	CD4Tconv	CD4Tconv	ATP5ME	-0.48	47.1	6.37e-231
0	Immune cells	CD4Tconv	CD4Tconv	FAM162A	-0.4	17	7.26e-231
0	Immune cells	CD4Tconv	CD4Tconv	STX7	-0.33	5	7.82e-231
0	Immune cells	CD4Tconv	CD4Tconv	CLTC	-0.32	14	1.09e-230
0	Immune cells	CD4Tconv	CD4Tconv	IDS	0.66	43.2	1.53e-230
0	Immune cells	CD4Tconv	CD4Tconv	AC254629.1	-0.44	0.2	1.7e-230
0	Immune cells	CD4Tconv	CD4Tconv	SPPL2B	-0.37	2.7	5.58e-229
0	Immune cells	CD4Tconv	CD4Tconv	ATP2C2	-0.45	0.3	6.78e-229
0	Immune cells	CD4Tconv	CD4Tconv	ACVRL1	-0.41	0.2	8.17e-229
0	Immune cells	CD4Tconv	CD4Tconv	LAG3	0.48	12.6	1e-228
0	Immune cells	CD4Tconv	CD4Tconv	FBXW5	-0.36	16.8	3.25e-228
0	Immune cells	CD4Tconv	CD4Tconv	ADAM9	-0.33	0.6	6.96e-228
0	Immune cells	CD4Tconv	CD4Tconv	CANT1	-0.35	3.5	7.57e-228
0	Immune cells	CD4Tconv	CD4Tconv	ASPH	-0.32	1.1	8.45e-228
0	Immune cells	CD4Tconv	CD4Tconv	A1CF	-0.39	0.1	1.62e-227
0	Immune cells	CD4Tconv	CD4Tconv	UBE2S	0.71	45.4	1.64e-227
0	Immune cells	CD4Tconv	CD4Tconv	SH3D19	-0.36	0.3	2.29e-227
0	Immune cells	CD4Tconv	CD4Tconv	WNK1	0.65	43.7	2.36e-227
0	Immune cells	CD4Tconv	CD4Tconv	GOLGA3	-0.27	8.2	6.52e-227
0	Immune cells	CD4Tconv	CD4Tconv	ZBTB7A	-0.37	21.2	8.75e-227
0	Immune cells	CD4Tconv	CD4Tconv	SNHG18	-0.35	0.2	9.99e-227
0	Immune cells	CD4Tconv	CD4Tconv	PPARA	-0.33	3.1	2.09e-226
0	Immune cells	CD4Tconv	CD4Tconv	IL32	0.55	22.2	2.68e-226
0	Immune cells	CD4Tconv	CD4Tconv	OST4	0.39	74.2	3.25e-226
0	Immune cells	CD4Tconv	CD4Tconv	ANKRD9	-0.39	3.3	4.37e-226
0	Immune cells	CD4Tconv	CD4Tconv	MSRB2	-0.28	4.9	4.52e-226
0	Immune cells	CD4Tconv	CD4Tconv	HSD17B11	-0.35	12.4	1.47e-225
0	Immune cells	CD4Tconv	CD4Tconv	PITPNC1	0.47	18.9	1.61e-225
0	Immune cells	CD4Tconv	CD4Tconv	RASEF	-0.42	0.3	8.93e-225
0	Immune cells	CD4Tconv	CD4Tconv	NAPRT	-0.37	3.7	1.11e-224
0	Immune cells	CD4Tconv	CD4Tconv	PLAC8	-1.13	13.4	1.38e-224
0	Immune cells	CD4Tconv	CD4Tconv	ATP5MC3	-0.48	40.7	1.33e-223
0	Immune cells	CD4Tconv	CD4Tconv	NDUFC1	-0.29	16	1.72e-223
0	Immune cells	CD4Tconv	CD4Tconv	GALE	-0.34	1.4	3.92e-223
0	Immune cells	CD4Tconv	CD4Tconv	IDH1	-0.31	1.7	2.4e-222
0	Immune cells	CD4Tconv	CD4Tconv	SON	0.45	68.9	5.88e-222
0	Immune cells	CD4Tconv	CD4Tconv	TRIM31	-0.64	0.2	1.14e-221
0	Immune cells	CD4Tconv	CD4Tconv	CXXC5	-0.26	1.6	4.74e-221
0	Immune cells	CD4Tconv	CD4Tconv	COBL	-0.39	0.1	6.73e-221
0	Immune cells	CD4Tconv	CD4Tconv	EEF1A1	0.39	74.9	7.55e-221
0	Immune cells	CD4Tconv	CD4Tconv	PGRMC1	-0.3	7.9	2.15e-220
0	Immune cells	CD4Tconv	CD4Tconv	GGH	-0.32	0.9	2.53e-220
0	Immune cells	CD4Tconv	CD4Tconv	DYNLL1	0.47	75.6	6.35e-220
0	Immune cells	CD4Tconv	CD4Tconv	SLC39A5	-0.4	0.3	7.02e-220
0	Immune cells	CD4Tconv	CD4Tconv	TSPAN6	-0.32	0.3	9.42e-220
0	Immune cells	CD4Tconv	CD4Tconv	SYNE2	0.56	55.4	1.3e-219
0	Immune cells	CD4Tconv	CD4Tconv	ARHGEF10L	-0.36	0.2	2.31e-219
0	Immune cells	CD4Tconv	CD4Tconv	PDCD4	0.5	64.7	3.02e-219
0	Immune cells	CD4Tconv	CD4Tconv	SOD1	0.54	65.2	4.42e-219
0	Immune cells	CD4Tconv	CD4Tconv	PINK1	-0.29	3.3	4.48e-219
0	Immune cells	CD4Tconv	CD4Tconv	HSPG2	-0.5	0.4	5e-219
0	Immune cells	CD4Tconv	CD4Tconv	LDHB	0.54	51.9	1.1e-218
0	Immune cells	CD4Tconv	CD4Tconv	SLPI	-0.57	0.6	1.94e-218
0	Immune cells	CD4Tconv	CD4Tconv	APOBR	-0.44	4.3	2.53e-218
0	Immune cells	CD4Tconv	CD4Tconv	C19orf33	-0.41	0.3	2.79e-218
0	Immune cells	CD4Tconv	CD4Tconv	VIPR1	-0.44	0.4	3.6e-218
0	Immune cells	CD4Tconv	CD4Tconv	PLEC	-0.41	10.8	4.42e-218
0	Immune cells	CD4Tconv	CD4Tconv	IGHA2	-2.95	7.4	4.71e-218
0	Immune cells	CD4Tconv	CD4Tconv	CREB3L1	-0.44	0.2	9.45e-218
0	Immune cells	CD4Tconv	CD4Tconv	MRPL27	-0.26	8.4	1.1e-217
0	Immune cells	CD4Tconv	CD4Tconv	HSD17B12	-0.26	6.1	1.32e-217
0	Immune cells	CD4Tconv	CD4Tconv	SIAE	-0.34	0.8	3.86e-217
0	Immune cells	CD4Tconv	CD4Tconv	GALNT5	-0.44	0.2	4.21e-217
0	Immune cells	CD4Tconv	CD4Tconv	WFDC2	-0.91	0.5	4.59e-217
0	Immune cells	CD4Tconv	CD4Tconv	FUT6	-0.4	0.2	4.96e-217
0	Immune cells	CD4Tconv	CD4Tconv	SHTN1	-0.34	0.4	1.06e-216
0	Immune cells	CD4Tconv	CD4Tconv	KIF1C	-0.33	3.6	1.26e-216
0	Immune cells	CD4Tconv	CD4Tconv	SGK1	-0.61	10.1	1.26e-216
0	Immune cells	CD4Tconv	CD4Tconv	BAIAP2L2	-0.38	0.4	2.2e-216
0	Immune cells	CD4Tconv	CD4Tconv	SEMA6A	-0.41	0.2	2.45e-216
0	Immune cells	CD4Tconv	CD4Tconv	MECOM	-0.36	0.2	3.31e-216
0	Immune cells	CD4Tconv	CD4Tconv	MAGI3	-0.35	2.2	4.21e-216
0	Immune cells	CD4Tconv	CD4Tconv	SORT1	-0.32	0.2	4.95e-216
0	Immune cells	CD4Tconv	CD4Tconv	RRAS	-0.34	3.4	6.71e-216
0	Immune cells	CD4Tconv	CD4Tconv	IKZF2	0.5	13.4	7.54e-216
0	Immune cells	CD4Tconv	CD4Tconv	POU2AF1	-0.31	1.2	1.67e-215
0	Immune cells	CD4Tconv	CD4Tconv	GIPC1	-0.45	10.4	1.99e-215
0	Immune cells	CD4Tconv	CD4Tconv	KIF16B	-0.35	2.9	4.44e-215
0	Immune cells	CD4Tconv	CD4Tconv	NHSL1	-0.35	0.2	6.58e-215
0	Immune cells	CD4Tconv	CD4Tconv	SH3PXD2A	-0.36	5.2	1.1e-214
0	Immune cells	CD4Tconv	CD4Tconv	MAGI1	-0.38	0.5	1.32e-214
0	Immune cells	CD4Tconv	CD4Tconv	TOX3	-0.33	0.1	1.57e-214
0	Immune cells	CD4Tconv	CD4Tconv	DDAH1	-0.32	0.4	1.59e-214
0	Immune cells	CD4Tconv	CD4Tconv	AHCYL2	-0.43	1.6	2.78e-214
0	Immune cells	CD4Tconv	CD4Tconv	CEP170B	-0.36	0.7	4.39e-214
0	Immune cells	CD4Tconv	CD4Tconv	CTSA	-0.43	15.2	5.62e-214
0	Immune cells	CD4Tconv	CD4Tconv	LRRK1	-0.28	0.2	2.19e-213
0	Immune cells	CD4Tconv	CD4Tconv	PLEKHA6	-0.35	0.2	5.88e-213
0	Immune cells	CD4Tconv	CD4Tconv	TANK	0.72	35.9	1.66e-212
0	Immune cells	CD4Tconv	CD4Tconv	ASL	-0.32	1.9	3.24e-212
0	Immune cells	CD4Tconv	CD4Tconv	MYOF	-0.34	0.6	3.9e-212
0	Immune cells	CD4Tconv	CD4Tconv	ATP5F1B	-0.4	33.6	1.55e-211
0	Immune cells	CD4Tconv	CD4Tconv	TXNDC17	-0.31	17.4	2.13e-211
0	Immune cells	CD4Tconv	CD4Tconv	ESRRA	-0.31	5.2	2.16e-211
0	Immune cells	CD4Tconv	CD4Tconv	RAPGEFL1	-0.35	0.7	4.81e-211
0	Immune cells	CD4Tconv	CD4Tconv	TFF1	-1.36	1.1	8.92e-211
0	Immune cells	CD4Tconv	CD4Tconv	RAPGEF5	-0.37	0.6	1.5e-210
0	Immune cells	CD4Tconv	CD4Tconv	GPBP1	0.55	59.2	1.5e-210
0	Immune cells	CD4Tconv	CD4Tconv	KCNK1	-0.36	0.3	1.58e-210
0	Immune cells	CD4Tconv	CD4Tconv	B3GALT5	-0.5	0.5	1.81e-210
0	Immune cells	CD4Tconv	CD4Tconv	WDR13	-0.26	4.8	2.01e-210
0	Immune cells	CD4Tconv	CD4Tconv	CRYBG3	-0.32	0.8	2.03e-210
0	Immune cells	CD4Tconv	CD4Tconv	LPP	-0.4	15.8	2.32e-210
0	Immune cells	CD4Tconv	CD4Tconv	SOWAHC	-0.33	0.3	5.87e-210
0	Immune cells	CD4Tconv	CD4Tconv	CDKN2B	-0.45	1.1	1.59e-209
0	Immune cells	CD4Tconv	CD4Tconv	SPIRE2	-0.35	0.7	1.76e-209
0	Immune cells	CD4Tconv	CD4Tconv	PLBD1	-0.28	0.3	2.1e-209
0	Immune cells	CD4Tconv	CD4Tconv	HOOK1	-0.28	2	2.15e-209
0	Immune cells	CD4Tconv	CD4Tconv	EXPH5	-0.38	0.5	4.75e-209
0	Immune cells	CD4Tconv	CD4Tconv	CDHR2	-0.56	0.3	9.45e-209
0	Immune cells	CD4Tconv	CD4Tconv	HBEGF	-0.49	5.2	2.72e-208
0	Immune cells	CD4Tconv	CD4Tconv	ELMO3	-0.33	0.7	3.17e-208
0	Immune cells	CD4Tconv	CD4Tconv	ARID4B	0.61	46.3	3.78e-208
0	Immune cells	CD4Tconv	CD4Tconv	PTPRK	-0.31	0.7	1.31e-207
0	Immune cells	CD4Tconv	CD4Tconv	C4orf48	-0.39	20.3	1.39e-207
0	Immune cells	CD4Tconv	CD4Tconv	PDZK1IP1	-0.42	0.4	1.43e-207
0	Immune cells	CD4Tconv	CD4Tconv	PIP5K1B	-0.29	0.7	1.58e-207
0	Immune cells	CD4Tconv	CD4Tconv	LYN	-0.37	1.7	1.89e-207
0	Immune cells	CD4Tconv	CD4Tconv	ANAPC16	0.58	53.1	3.09e-207
0	Immune cells	CD4Tconv	CD4Tconv	SERPINB9	0.58	32.5	4.58e-207
0	Immune cells	CD4Tconv	CD4Tconv	ADAM15	-0.35	2.5	1.71e-206
0	Immune cells	CD4Tconv	CD4Tconv	BICDL1	0.35	11.4	1.77e-206
0	Immune cells	CD4Tconv	CD4Tconv	MAVS	-0.33	6.4	1.8e-206
0	Immune cells	CD4Tconv	CD4Tconv	ABRACL	0.58	47.5	2.54e-206
0	Immune cells	CD4Tconv	CD4Tconv	PLIN3	-0.3	5.8	3.19e-206
0	Immune cells	CD4Tconv	CD4Tconv	SCIN	-0.43	0.1	4.72e-206
0	Immune cells	CD4Tconv	CD4Tconv	ARHGAP15	0.46	19.7	7.01e-206
0	Immune cells	CD4Tconv	CD4Tconv	SLC17A4	-0.55	0.1	1.32e-205
0	Immune cells	CD4Tconv	CD4Tconv	CLSTN1	-0.34	11	1.68e-205
0	Immune cells	CD4Tconv	CD4Tconv	TSPAN5	0.43	15.8	1.94e-205
0	Immune cells	CD4Tconv	CD4Tconv	CLCN3	-0.28	6.5	3.78e-205
0	Immune cells	CD4Tconv	CD4Tconv	PRRC2C	0.41	70.8	3.84e-205
0	Immune cells	CD4Tconv	CD4Tconv	GUCA2B	-2.05	0.6	6.59e-205
0	Immune cells	CD4Tconv	CD4Tconv	HNMT	-0.27	0.2	6.97e-205
0	Immune cells	CD4Tconv	CD4Tconv	CTTNBP2NL	-0.35	2.1	8.82e-205
0	Immune cells	CD4Tconv	CD4Tconv	STAT6	-0.33	6.1	1.5e-204
0	Immune cells	CD4Tconv	CD4Tconv	EFNB1	-0.32	1.1	2.1e-204
0	Immune cells	CD4Tconv	CD4Tconv	NR2F2	-0.38	0.2	3.26e-204
0	Immune cells	CD4Tconv	CD4Tconv	LRRC19	-0.39	0.1	9.55e-204
0	Immune cells	CD4Tconv	CD4Tconv	TRIOBP	-0.28	4.3	9.76e-204
0	Immune cells	CD4Tconv	CD4Tconv	SRSF3	0.46	69	1.01e-203
0	Immune cells	CD4Tconv	CD4Tconv	SDC4	-0.37	7.2	1.26e-203
0	Immune cells	CD4Tconv	CD4Tconv	NDUFV1	-0.26	12.9	1.3e-203
0	Immune cells	CD4Tconv	CD4Tconv	COMMD6	0.45	62.8	3.28e-203
0	Immune cells	CD4Tconv	CD4Tconv	CHMP2A	-0.34	25.2	3.8e-203
0	Immune cells	CD4Tconv	CD4Tconv	ZFHX3	-0.37	1.1	3.84e-203
0	Immune cells	CD4Tconv	CD4Tconv	PAK1	-0.26	2	4.8e-203
0	Immune cells	CD4Tconv	CD4Tconv	LRP5	-0.3	0.3	1.32e-202
0	Immune cells	CD4Tconv	CD4Tconv	ADCY6	-0.34	0.1	1.34e-202
0	Immune cells	CD4Tconv	CD4Tconv	MCUB	0.49	22	3.43e-202
0	Immune cells	CD4Tconv	CD4Tconv	ENTPD6	-0.3	3.4	3.55e-202
0	Immune cells	CD4Tconv	CD4Tconv	FAM83E	-0.39	0.1	6.91e-202
0	Immune cells	CD4Tconv	CD4Tconv	DHX32	-0.31	1.4	8.75e-202
0	Immune cells	CD4Tconv	CD4Tconv	COL17A1	-0.45	0.4	9.95e-202
0	Immune cells	CD4Tconv	CD4Tconv	HRCT1	-0.46	0.1	3.48e-201
0	Immune cells	CD4Tconv	CD4Tconv	GUCY2C	-0.34	0.2	2.2e-200
0	Immune cells	CD4Tconv	CD4Tconv	HADH	-0.32	3.5	4.52e-200
0	Immune cells	CD4Tconv	CD4Tconv	BCAR1	-0.3	0.1	4.73e-200
0	Immune cells	CD4Tconv	CD4Tconv	TMBIM1	-0.35	6.3	1.19e-199
0	Immune cells	CD4Tconv	CD4Tconv	CISD3	-0.32	11.6	2.03e-199
0	Immune cells	CD4Tconv	CD4Tconv	PTPN12	-0.29	4.1	2.72e-199
0	Immune cells	CD4Tconv	CD4Tconv	PCLO	-0.47	0.1	4.2e-199
0	Immune cells	CD4Tconv	CD4Tconv	ATP5MC1	-0.32	20.9	5.95e-199
0	Immune cells	CD4Tconv	CD4Tconv	TMEM106C	-0.29	5.2	7.2e-199
0	Immune cells	CD4Tconv	CD4Tconv	TMEM131	-0.26	9	7.38e-199
0	Immune cells	CD4Tconv	CD4Tconv	PPP1R16B	0.41	14.1	7.59e-199
0	Immune cells	CD4Tconv	CD4Tconv	CYFIP2	0.52	23.2	3.21e-198
0	Immune cells	CD4Tconv	CD4Tconv	ARID5B	0.81	44.2	3.45e-198
0	Immune cells	CD4Tconv	CD4Tconv	EGFR	-0.31	0.1	5.84e-198
0	Immune cells	CD4Tconv	CD4Tconv	ACAA2	-0.37	10.9	8.08e-198
0	Immune cells	CD4Tconv	CD4Tconv	MOB3B	-0.31	0.1	1.06e-197
0	Immune cells	CD4Tconv	CD4Tconv	CCDC112	-0.26	1.4	1.45e-197
0	Immune cells	CD4Tconv	CD4Tconv	SELPLG	0.46	17.1	2.53e-197
0	Immune cells	CD4Tconv	CD4Tconv	B3GNT3	-0.32	0.1	6.09e-197
0	Immune cells	CD4Tconv	CD4Tconv	CEBPD	-0.41	11.7	7.42e-197
0	Immune cells	CD4Tconv	CD4Tconv	SLC26A2	-0.6	0.5	1.43e-196
0	Immune cells	CD4Tconv	CD4Tconv	NEO1	-0.32	2.3	2.89e-196
0	Immune cells	CD4Tconv	CD4Tconv	CD84	0.45	17.5	3.59e-196
0	Immune cells	CD4Tconv	CD4Tconv	TRAF1	0.32	10.8	8.37e-196
0	Immune cells	CD4Tconv	CD4Tconv	UQCC3	-0.25	6.9	1.05e-195
0	Immune cells	CD4Tconv	CD4Tconv	ACSL5	-0.32	7.6	1.64e-195
0	Immune cells	CD4Tconv	CD4Tconv	RGS2	0.59	43.9	4.4e-195
0	Immune cells	CD4Tconv	CD4Tconv	MLPH	-0.45	0.4	6.2e-195
0	Immune cells	CD4Tconv	CD4Tconv	ALDH18A1	-0.26	3.3	1.34e-194
0	Immune cells	CD4Tconv	CD4Tconv	CRIM1	-0.31	2.7	1.87e-194
0	Immune cells	CD4Tconv	CD4Tconv	ANXA2R	0.38	12.5	2.33e-194
0	Immune cells	CD4Tconv	CD4Tconv	MT1H	-1	0.4	3.69e-194
0	Immune cells	CD4Tconv	CD4Tconv	CDC42	0.45	65.5	3.95e-194
0	Immune cells	CD4Tconv	CD4Tconv	TMEM30B	-0.29	0.7	6.76e-194
0	Immune cells	CD4Tconv	CD4Tconv	NBEAL1	-0.36	2.7	8.12e-194
0	Immune cells	CD4Tconv	CD4Tconv	LAPTM4A	-0.3	20.3	8.14e-194
0	Immune cells	CD4Tconv	CD4Tconv	ATP9A	-0.31	0.9	8.38e-194
0	Immune cells	CD4Tconv	CD4Tconv	CENPX	-0.3	13.9	8.87e-194
0	Immune cells	CD4Tconv	CD4Tconv	PLXNA2	-0.33	0.2	2.32e-193
0	Immune cells	CD4Tconv	CD4Tconv	MAST2	-0.36	1.2	7.76e-193
0	Immune cells	CD4Tconv	CD4Tconv	RAP1A	0.61	44.8	9.52e-193
0	Immune cells	CD4Tconv	CD4Tconv	CBLC	-0.3	0.1	1.04e-192
0	Immune cells	CD4Tconv	CD4Tconv	PDCL3	0.61	26.7	1.45e-192
0	Immune cells	CD4Tconv	CD4Tconv	FNIP2	-0.3	2.6	2.16e-192
0	Immune cells	CD4Tconv	CD4Tconv	IRF6	-0.31	0.4	2.78e-192
0	Immune cells	CD4Tconv	CD4Tconv	NDUFS6	-0.31	32.9	1.01e-191
0	Immune cells	CD4Tconv	CD4Tconv	RBMS1	0.51	25.4	1.75e-191
0	Immune cells	CD4Tconv	CD4Tconv	NR3C2	-0.37	1.7	2.18e-191
0	Immune cells	CD4Tconv	CD4Tconv	ECHS1	-0.29	16.8	2.56e-191
0	Immune cells	CD4Tconv	CD4Tconv	NPTN	-0.26	6	2.61e-191
0	Immune cells	CD4Tconv	CD4Tconv	WDR34	-0.31	0.9	2.69e-191
0	Immune cells	CD4Tconv	CD4Tconv	CDKN2B-AS1	-0.61	0.1	5.35e-191
0	Immune cells	CD4Tconv	CD4Tconv	RXRA	-0.27	1.6	1.04e-190
0	Immune cells	CD4Tconv	CD4Tconv	ACTN4	-0.37	21.1	2.27e-190
0	Immune cells	CD4Tconv	CD4Tconv	KNOP1	-0.33	4.9	3.51e-190
0	Immune cells	CD4Tconv	CD4Tconv	GAK	-0.29	8.4	1.3e-189
0	Immune cells	CD4Tconv	CD4Tconv	DMXL2	-0.35	0.6	1.57e-189
0	Immune cells	CD4Tconv	CD4Tconv	MOGAT3	-0.35	0.2	2.24e-189
0	Immune cells	CD4Tconv	CD4Tconv	GNAQ	-0.3	7.8	3.43e-189
0	Immune cells	CD4Tconv	CD4Tconv	SNORC	-0.38	0.3	6.3e-189
0	Immune cells	CD4Tconv	CD4Tconv	MMP15	-0.3	0.3	1.14e-188
0	Immune cells	CD4Tconv	CD4Tconv	ROMO1	-0.27	20.4	1.31e-188
0	Immune cells	CD4Tconv	CD4Tconv	SQSTM1	-0.32	28.2	1.47e-188
0	Immune cells	CD4Tconv	CD4Tconv	AC020916.1	0.68	51.6	1.5e-188
0	Immune cells	CD4Tconv	CD4Tconv	CDKN1B	0.65	39.2	2.2e-188
0	Immune cells	CD4Tconv	CD4Tconv	CNN3	-0.34	0.6	3.2e-188
0	Immune cells	CD4Tconv	CD4Tconv	AP2S1	-0.28	20.3	2.08e-187
0	Immune cells	CD4Tconv	CD4Tconv	DOK4	-0.3	0.5	3.82e-187
0	Immune cells	CD4Tconv	CD4Tconv	BLOC1S1	-0.39	23.6	5.9e-187
0	Immune cells	CD4Tconv	CD4Tconv	DOCK1	-0.31	0.2	8.33e-187
0	Immune cells	CD4Tconv	CD4Tconv	PTGER2	0.43	12.9	1.73e-186
0	Immune cells	CD4Tconv	CD4Tconv	PLOD2	-0.36	0.2	1.96e-186
0	Immune cells	CD4Tconv	CD4Tconv	GPT	-0.39	0.2	2.58e-186
0	Immune cells	CD4Tconv	CD4Tconv	ABCA5	-0.35	6	3.47e-186
0	Immune cells	CD4Tconv	CD4Tconv	BMP2K	-0.32	2.2	4.82e-186
0	Immune cells	CD4Tconv	CD4Tconv	DIAPH2	-0.32	6.3	5.41e-186
0	Immune cells	CD4Tconv	CD4Tconv	TPCN1	-0.3	2.2	8.11e-186
0	Immune cells	CD4Tconv	CD4Tconv	PTK2	-0.28	0.4	8.24e-186
0	Immune cells	CD4Tconv	CD4Tconv	ANKS4B	-0.31	0.1	2.67e-185
0	Immune cells	CD4Tconv	CD4Tconv	PRDX6	-0.42	26.1	5e-185
0	Immune cells	CD4Tconv	CD4Tconv	STX19	-0.35	0.2	6.86e-185
0	Immune cells	CD4Tconv	CD4Tconv	SVIL	-0.3	1.9	8.15e-185
0	Immune cells	CD4Tconv	CD4Tconv	PLEKHG6	-0.33	0.1	8.31e-185
0	Immune cells	CD4Tconv	CD4Tconv	BIN2	0.51	21.4	1.02e-184
0	Immune cells	CD4Tconv	CD4Tconv	BAZ2B	-0.25	10.2	1.2e-184
0	Immune cells	CD4Tconv	CD4Tconv	TMEM184A	-0.33	0.4	1.58e-184
0	Immune cells	CD4Tconv	CD4Tconv	DDX3X	0.63	41.1	1.81e-184
0	Immune cells	CD4Tconv	CD4Tconv	ARPC3	0.38	69.4	3.03e-184
0	Immune cells	CD4Tconv	CD4Tconv	ISG20	0.52	53.2	3.22e-184
0	Immune cells	CD4Tconv	CD4Tconv	THBS1	-0.59	4.7	3.22e-184
0	Immune cells	CD4Tconv	CD4Tconv	RNF43	-0.41	0.5	8.55e-184
0	Immune cells	CD4Tconv	CD4Tconv	KIAA1217	-0.3	0.5	1.57e-183
0	Immune cells	CD4Tconv	CD4Tconv	PALLD	-0.34	0.4	1.86e-183
0	Immune cells	CD4Tconv	CD4Tconv	PARD3	-0.29	0.2	2.2e-183
0	Immune cells	CD4Tconv	CD4Tconv	TACC2	-0.29	0.2	2.38e-183
0	Immune cells	CD4Tconv	CD4Tconv	CA4	-0.87	0.1	4.14e-183
0	Immune cells	CD4Tconv	CD4Tconv	SELENOK	0.48	63.7	7.03e-183
0	Immune cells	CD4Tconv	CD4Tconv	FCHO2	-0.26	1.2	9.12e-183
0	Immune cells	CD4Tconv	CD4Tconv	KCTD12	-0.44	0.7	1.53e-182
0	Immune cells	CD4Tconv	CD4Tconv	PDE9A	-0.48	0.9	1.6e-182
0	Immune cells	CD4Tconv	CD4Tconv	TM4SF5	-0.4	0.1	1.85e-182
0	Immune cells	CD4Tconv	CD4Tconv	PTGER4	0.62	35.3	4.47e-182
0	Immune cells	CD4Tconv	CD4Tconv	SPRY2	-0.3	1.3	5.62e-182
0	Immune cells	CD4Tconv	CD4Tconv	VCL	-0.27	3	8.45e-182
0	Immune cells	CD4Tconv	CD4Tconv	TMEM37	-0.43	0.1	8.58e-182
0	Immune cells	CD4Tconv	CD4Tconv	AQP8	-1.94	0.6	9.32e-182
0	Immune cells	CD4Tconv	CD4Tconv	PANK3	-0.31	8.4	2.39e-181
0	Immune cells	CD4Tconv	CD4Tconv	SOCS6	-0.28	0.3	5.33e-181
0	Immune cells	CD4Tconv	CD4Tconv	TMEM125	-0.28	0.2	6.74e-181
0	Immune cells	CD4Tconv	CD4Tconv	PPDPF	-0.61	59.7	8.88e-181
0	Immune cells	CD4Tconv	CD4Tconv	MTMR11	-0.32	0.2	9.57e-181
0	Immune cells	CD4Tconv	CD4Tconv	HSD17B2	-0.45	0.1	1.29e-180
0	Immune cells	CD4Tconv	CD4Tconv	EPPK1	-0.33	0.5	1.8e-180
0	Immune cells	CD4Tconv	CD4Tconv	ZFP36	0.49	70.7	3.41e-180
0	Immune cells	CD4Tconv	CD4Tconv	VSIG10	-0.29	0.7	3.59e-180
0	Immune cells	CD4Tconv	CD4Tconv	DHCR24	-0.3	0.9	1.13e-179
0	Immune cells	CD4Tconv	CD4Tconv	NFIA	-0.32	1.5	1.62e-179
0	Immune cells	CD4Tconv	CD4Tconv	TMC8	0.44	20.1	2.31e-179
0	Immune cells	CD4Tconv	CD4Tconv	SIPA1L3	-0.3	1.7	2.96e-179
0	Immune cells	CD4Tconv	CD4Tconv	PDE4B	0.57	32.5	3.94e-179
0	Immune cells	CD4Tconv	CD4Tconv	BRI3BP	-0.25	3.5	7.41e-179
0	Immune cells	CD4Tconv	CD4Tconv	DOCK2	0.53	25.5	7.58e-179
0	Immune cells	CD4Tconv	CD4Tconv	CLTB	-0.41	22.3	8.3e-179
0	Immune cells	CD4Tconv	CD4Tconv	CASP7	-0.3	6.4	1.14e-178
0	Immune cells	CD4Tconv	CD4Tconv	SCNN1B	-0.39	0.1	1.41e-178
0	Immune cells	CD4Tconv	CD4Tconv	F2RL1	-0.3	0.4	1.58e-178
0	Immune cells	CD4Tconv	CD4Tconv	IGKJ5	-0.54	0.3	2.02e-178
0	Immune cells	CD4Tconv	CD4Tconv	ITGA4	0.53	23.5	2.21e-178
0	Immune cells	CD4Tconv	CD4Tconv	BCAS1	-0.41	0.4	5.68e-178
0	Immune cells	CD4Tconv	CD4Tconv	INAVA	-0.31	0.3	6.4e-178
0	Immune cells	CD4Tconv	CD4Tconv	EPB41L2	-0.26	1.1	8.49e-178
0	Immune cells	CD4Tconv	CD4Tconv	ARNTL	0.39	14	9.21e-178
0	Immune cells	CD4Tconv	CD4Tconv	GTF2B	0.61	39.1	1.66e-177
0	Immune cells	CD4Tconv	CD4Tconv	SULF2	-0.26	1.1	2e-177
0	Immune cells	CD4Tconv	CD4Tconv	LPIN3	-0.29	0.3	2.52e-177
0	Immune cells	CD4Tconv	CD4Tconv	TMEM236	-0.36	1.1	2.74e-177
0	Immune cells	CD4Tconv	CD4Tconv	B4GALNT3	-0.33	0.4	3.41e-177
0	Immune cells	CD4Tconv	CD4Tconv	CEACAM5	-0.31	0	3.42e-177
0	Immune cells	CD4Tconv	CD4Tconv	KCNQ1OT1	-0.4	26.1	3.6e-177
0	Immune cells	CD4Tconv	CD4Tconv	MAFB	-0.69	0.8	3.96e-177
0	Immune cells	CD4Tconv	CD4Tconv	EXT1	-0.28	2	5.33e-177
0	Immune cells	CD4Tconv	CD4Tconv	GIMAP6	0.32	10.6	1.22e-176
0	Immune cells	CD4Tconv	CD4Tconv	SLC51B	-0.51	0.1	6.44e-176
0	Immune cells	CD4Tconv	CD4Tconv	PLXDC2	-0.36	0.4	8.71e-176
0	Immune cells	CD4Tconv	CD4Tconv	SPINT1-AS1	-0.26	0.4	9.14e-175
0	Immune cells	CD4Tconv	CD4Tconv	SSR3	-0.29	25.3	1.01e-174
0	Immune cells	CD4Tconv	CD4Tconv	PIGZ	-0.31	0.2	1.09e-174
0	Immune cells	CD4Tconv	CD4Tconv	BCL2L15	-0.3	0.4	1.21e-174
0	Immune cells	CD4Tconv	CD4Tconv	MBOAT2	-0.29	0.4	1.61e-174
0	Immune cells	CD4Tconv	CD4Tconv	SLC9A3	-0.82	1.6	1.76e-174
0	Immune cells	CD4Tconv	CD4Tconv	DDIT4	0.58	53.9	2.14e-174
0	Immune cells	CD4Tconv	CD4Tconv	RCAN3	0.46	18.4	2.14e-174
0	Immune cells	CD4Tconv	CD4Tconv	BDH1	-0.27	0.9	2.34e-174
0	Immune cells	CD4Tconv	CD4Tconv	FAM13A	-0.32	3.4	2.4e-174
0	Immune cells	CD4Tconv	CD4Tconv	WAS	0.47	21.8	1.36e-173
0	Immune cells	CD4Tconv	CD4Tconv	Z93241.1	-0.43	4.9	1.39e-173
0	Immune cells	CD4Tconv	CD4Tconv	DHRS9	-0.47	0.3	1.43e-173
0	Immune cells	CD4Tconv	CD4Tconv	HSPH1	0.8	48.5	1.68e-173
0	Immune cells	CD4Tconv	CD4Tconv	ZBTB7B	-0.33	5.2	5.56e-173
0	Immune cells	CD4Tconv	CD4Tconv	ATP2B4	0.5	22	3.12e-172
0	Immune cells	CD4Tconv	CD4Tconv	RILPL2	0.47	25.6	4.21e-172
0	Immune cells	CD4Tconv	CD4Tconv	CEBPA	-0.28	1.8	8.25e-172
0	Immune cells	CD4Tconv	CD4Tconv	CLCA4	-2.05	0.6	8.9e-172
0	Immune cells	CD4Tconv	CD4Tconv	WDR60	-0.31	5.7	1.46e-171
0	Immune cells	CD4Tconv	CD4Tconv	IL27RA	0.45	17.4	2.07e-171
0	Immune cells	CD4Tconv	CD4Tconv	SEMA3C	-0.28	0.2	2.33e-171
0	Immune cells	CD4Tconv	CD4Tconv	ASAH1	-0.29	5.5	5.8e-171
0	Immune cells	CD4Tconv	CD4Tconv	CC2D1A	-0.29	2.1	7.27e-171
0	Immune cells	CD4Tconv	CD4Tconv	MYO5C	-0.3	1.4	8.84e-171
0	Immune cells	CD4Tconv	CD4Tconv	ITPR3	-0.27	4.6	1.6e-170
0	Immune cells	CD4Tconv	CD4Tconv	MYO1G	0.37	13.6	1.84e-170
0	Immune cells	CD4Tconv	CD4Tconv	TMEM63B	-0.27	1.6	3.87e-170
0	Immune cells	CD4Tconv	CD4Tconv	GATA6	-0.27	0.3	4.85e-170
0	Immune cells	CD4Tconv	CD4Tconv	TRIR	0.46	60.7	5.23e-170
0	Immune cells	CD4Tconv	CD4Tconv	GK5	-0.27	3.5	5.43e-170
0	Immune cells	CD4Tconv	CD4Tconv	RAVER2	-0.27	0.5	8.5e-170
0	Immune cells	CD4Tconv	CD4Tconv	CCND2	0.54	43.3	1.14e-169
0	Immune cells	CD4Tconv	CD4Tconv	ZSWIM6	-0.26	4	1.7e-169
0	Immune cells	CD4Tconv	CD4Tconv	ITGB5	-0.25	0.2	3.46e-169
0	Immune cells	CD4Tconv	CD4Tconv	PHTF2	0.5	20.6	3.99e-169
0	Immune cells	CD4Tconv	CD4Tconv	PARK7	0.54	55	5.24e-169
0	Immune cells	CD4Tconv	CD4Tconv	EML4	0.55	42.8	8.21e-169
0	Immune cells	CD4Tconv	CD4Tconv	CDA	-0.46	0.1	8.87e-169
0	Immune cells	CD4Tconv	CD4Tconv	FRMD1	-0.39	0	1.16e-168
0	Immune cells	CD4Tconv	CD4Tconv	HHLA2	-0.36	0.1	1.69e-168
0	Immune cells	CD4Tconv	CD4Tconv	ARFGEF3	-0.31	0.3	2.28e-168
0	Immune cells	CD4Tconv	CD4Tconv	CNNM4	-0.28	3	2.62e-168
0	Immune cells	CD4Tconv	CD4Tconv	ABR	-0.28	4	6.52e-168
0	Immune cells	CD4Tconv	CD4Tconv	RHPN2	-0.27	0.2	9.42e-168
0	Immune cells	CD4Tconv	CD4Tconv	MYO1B	-0.27	0.8	2.48e-167
0	Immune cells	CD4Tconv	CD4Tconv	PSD3	-0.29	0.7	2.85e-167
0	Immune cells	CD4Tconv	CD4Tconv	ZNF326	-0.25	10.5	5.09e-167
0	Immune cells	CD4Tconv	CD4Tconv	OSTF1	0.61	35.6	9.95e-167
0	Immune cells	CD4Tconv	CD4Tconv	GNLY	0.61	10.2	1.16e-166
0	Immune cells	CD4Tconv	CD4Tconv	SQOR	-0.27	11.1	2.55e-166
0	Immune cells	CD4Tconv	CD4Tconv	UGT8	-0.26	0.3	3.68e-166
0	Immune cells	CD4Tconv	CD4Tconv	ALDH1A1	-0.34	0.2	5.85e-166
0	Immune cells	CD4Tconv	CD4Tconv	LINC01133	-0.33	0	7.93e-166
0	Immune cells	CD4Tconv	CD4Tconv	ARHGAP27	-0.27	3.8	9.91e-166
0	Immune cells	CD4Tconv	CD4Tconv	MST1R	-0.29	0.2	1.04e-165
0	Immune cells	CD4Tconv	CD4Tconv	LINC00483	-0.29	0.1	1.13e-165
0	Immune cells	CD4Tconv	CD4Tconv	AAK1	0.52	29.8	1.25e-165
0	Immune cells	CD4Tconv	CD4Tconv	IL17RE	-0.29	1.3	1.92e-165
0	Immune cells	CD4Tconv	CD4Tconv	CD27	0.63	31.7	2.19e-165
0	Immune cells	CD4Tconv	CD4Tconv	GBA2	-0.27	3.1	3.96e-165
0	Immune cells	CD4Tconv	CD4Tconv	S100A10	-0.82	66.8	4.83e-165
0	Immune cells	CD4Tconv	CD4Tconv	SMIM31	-0.31	0.1	5.55e-165
0	Immune cells	CD4Tconv	CD4Tconv	TLN2	-0.3	0.3	6.24e-165
0	Immune cells	CD4Tconv	CD4Tconv	RARRES2	-0.59	0.3	8.81e-165
0	Immune cells	CD4Tconv	CD4Tconv	HIST1H2BD	-0.26	1.9	2.48e-164
0	Immune cells	CD4Tconv	CD4Tconv	UGT2A3	-0.36	0.1	3.08e-164
0	Immune cells	CD4Tconv	CD4Tconv	TMEM59	-0.35	48.2	8.61e-164
0	Immune cells	CD4Tconv	CD4Tconv	SLC22A23	-0.28	0.3	9.09e-164
0	Immune cells	CD4Tconv	CD4Tconv	WNK4	-0.34	0.1	1.37e-163
0	Immune cells	CD4Tconv	CD4Tconv	CACFD1	-0.28	0.6	1.44e-163
0	Immune cells	CD4Tconv	CD4Tconv	LINC02023	-0.43	0	1.76e-163
0	Immune cells	CD4Tconv	CD4Tconv	TMA7	0.42	65.1	1.95e-163
0	Immune cells	CD4Tconv	CD4Tconv	PLIN2	0.63	25	4.66e-163
0	Immune cells	CD4Tconv	CD4Tconv	SLC9A2	-0.29	0.1	4.88e-163
0	Immune cells	CD4Tconv	CD4Tconv	CCL28	-0.32	1.1	8.36e-163
0	Immune cells	CD4Tconv	CD4Tconv	FCMR	0.36	18.6	1.01e-162
0	Immune cells	CD4Tconv	CD4Tconv	APPL2	-0.32	5.1	2.12e-162
0	Immune cells	CD4Tconv	CD4Tconv	HELB	0.48	19.5	5.9e-162
0	Immune cells	CD4Tconv	CD4Tconv	CSRNP1	0.59	32.9	8.15e-162
0	Immune cells	CD4Tconv	CD4Tconv	SPDEF	-0.43	0.1	2.65e-161
0	Immune cells	CD4Tconv	CD4Tconv	NOXO1	-0.27	0.3	3.32e-161
0	Immune cells	CD4Tconv	CD4Tconv	CFD	-0.95	1.1	3.34e-161
0	Immune cells	CD4Tconv	CD4Tconv	FAAH	-0.26	0.3	3.87e-161
0	Immune cells	CD4Tconv	CD4Tconv	PPARG	-0.28	2.2	4.83e-161
0	Immune cells	CD4Tconv	CD4Tconv	LAMA3	-0.36	0.1	1.18e-160
0	Immune cells	CD4Tconv	CD4Tconv	LDHA	0.44	61.2	1.25e-160
0	Immune cells	CD4Tconv	CD4Tconv	ICAM3	0.58	39.4	5.38e-160
0	Immune cells	CD4Tconv	CD4Tconv	GPR35	-0.26	2.3	1.48e-159
0	Immune cells	CD4Tconv	CD4Tconv	BMP2	-0.3	0.1	6.43e-159
0	Immune cells	CD4Tconv	CD4Tconv	REP15	-0.88	0.2	9.57e-159
0	Immune cells	CD4Tconv	CD4Tconv	GSDMB	-0.27	1.8	1.1e-158
0	Immune cells	CD4Tconv	CD4Tconv	PERP	-0.43	15	1.2e-158
0	Immune cells	CD4Tconv	CD4Tconv	ZNF704	-0.27	0.2	1.58e-158
0	Immune cells	CD4Tconv	CD4Tconv	CLIP2	-0.26	0.3	2.22e-158
0	Immune cells	CD4Tconv	CD4Tconv	ANO9	-0.32	5.3	3.8e-158
0	Immune cells	CD4Tconv	CD4Tconv	ADGRE5	0.6	38.5	5.96e-158
0	Immune cells	CD4Tconv	CD4Tconv	PRAC1	-0.56	0.1	7.5e-158
0	Immune cells	CD4Tconv	CD4Tconv	DECR2	-0.25	0.4	2.54e-157
0	Immune cells	CD4Tconv	CD4Tconv	URAD	-0.34	0.1	2.86e-157
0	Immune cells	CD4Tconv	CD4Tconv	ARHGEF6	0.38	15.6	3.17e-157
0	Immune cells	CD4Tconv	CD4Tconv	PLXNB1	-0.27	0.7	5.01e-157
0	Immune cells	CD4Tconv	CD4Tconv	FOXA3	-0.28	0.3	6.96e-157
0	Immune cells	CD4Tconv	CD4Tconv	SRP14	0.29	79.9	9.47e-157
0	Immune cells	CD4Tconv	CD4Tconv	EIF4A2	0.43	66.2	1.21e-156
0	Immune cells	CD4Tconv	CD4Tconv	AKR1B10	-0.33	0.1	1.61e-156
0	Immune cells	CD4Tconv	CD4Tconv	LDLRAD4	0.47	18.4	3.07e-156
0	Immune cells	CD4Tconv	CD4Tconv	CLDN23	-0.4	0.1	5.56e-156
0	Immune cells	CD4Tconv	CD4Tconv	CD68	-0.45	1.9	6.6e-156
0	Immune cells	CD4Tconv	CD4Tconv	ARHGEF3	0.39	14.5	9.83e-156
0	Immune cells	CD4Tconv	CD4Tconv	LRRC1	-0.28	1.3	1.75e-155
0	Immune cells	CD4Tconv	CD4Tconv	ABHD2	-0.27	6.9	2.02e-155
0	Immune cells	CD4Tconv	CD4Tconv	EGR1	-0.25	31.4	2.49e-155
0	Immune cells	CD4Tconv	CD4Tconv	PDZD3	-0.34	0.2	4.7e-155
0	Immune cells	CD4Tconv	CD4Tconv	MRPL41	-0.26	24.6	3.66e-154
0	Immune cells	CD4Tconv	CD4Tconv	BTNL3	-0.32	0.1	1.79e-153
0	Immune cells	CD4Tconv	CD4Tconv	SIRT6	-0.27	2.5	3.15e-153
0	Immune cells	CD4Tconv	CD4Tconv	UBE2D3	0.5	55.6	4.83e-153
0	Immune cells	CD4Tconv	CD4Tconv	SLC26A6	-0.25	1.2	5.06e-153
0	Immune cells	CD4Tconv	CD4Tconv	ARAP2	0.46	22.3	5.38e-153
0	Immune cells	CD4Tconv	CD4Tconv	PNPLA2	-0.26	12.7	1.26e-152
0	Immune cells	CD4Tconv	CD4Tconv	PEAK1	-0.26	1.9	1.81e-152
0	Immune cells	CD4Tconv	CD4Tconv	CHDH	-0.28	1	2.52e-152
0	Immune cells	CD4Tconv	CD4Tconv	RPL39	0.48	61.5	3.04e-152
0	Immune cells	CD4Tconv	CD4Tconv	MIAT	0.46	14.3	3.24e-152
0	Immune cells	CD4Tconv	CD4Tconv	CFTR	-0.29	0.2	5.01e-152
0	Immune cells	CD4Tconv	CD4Tconv	CARD10	-0.26	0.1	2.36e-151
0	Immune cells	CD4Tconv	CD4Tconv	C1orf115	-0.29	0.1	3.62e-151
0	Immune cells	CD4Tconv	CD4Tconv	ACOT11	-0.29	0.2	3.69e-151
0	Immune cells	CD4Tconv	CD4Tconv	ARHGAP30	0.43	17.8	5.77e-151
0	Immune cells	CD4Tconv	CD4Tconv	SLC9A3R2	-0.27	0.9	6.84e-151
0	Immune cells	CD4Tconv	CD4Tconv	TGFBI	-0.46	1.9	1.26e-150
0	Immune cells	CD4Tconv	CD4Tconv	ARID5A	0.52	23.8	1.44e-150
0	Immune cells	CD4Tconv	CD4Tconv	BCAS2	0.6	37.1	1.97e-150
0	Immune cells	CD4Tconv	CD4Tconv	ELOB	-0.39	51.3	4.2e-150
0	Immune cells	CD4Tconv	CD4Tconv	TTN	0.35	10.5	5.34e-150
0	Immune cells	CD4Tconv	CD4Tconv	LEFTY1	-0.49	0.2	8.69e-150
0	Immune cells	CD4Tconv	CD4Tconv	PTGES3	0.46	59.6	1.11e-149
0	Immune cells	CD4Tconv	CD4Tconv	ITLN1	-1.59	0.7	2.77e-149
0	Immune cells	CD4Tconv	CD4Tconv	BRD2	0.46	63.6	9.26e-149
0	Immune cells	CD4Tconv	CD4Tconv	PTPN7	0.37	12.9	1.14e-148
0	Immune cells	CD4Tconv	CD4Tconv	HSPE1	0.58	57.3	3.03e-148
0	Immune cells	CD4Tconv	CD4Tconv	ETNK1	-0.34	14.7	3.79e-148
0	Immune cells	CD4Tconv	CD4Tconv	PBLD	-0.26	0.3	6.91e-148
0	Immune cells	CD4Tconv	CD4Tconv	PIK3CD	0.3	10.4	1.23e-147
0	Immune cells	CD4Tconv	CD4Tconv	AKAP9	-0.32	46.2	2.49e-147
0	Immune cells	CD4Tconv	CD4Tconv	NFATC2	0.44	16.4	2.78e-147
0	Immune cells	CD4Tconv	CD4Tconv	TRPM6	-0.41	0.1	2.81e-147
0	Immune cells	CD4Tconv	CD4Tconv	LAMB1	-0.3	0.6	4.45e-147
0	Immune cells	CD4Tconv	CD4Tconv	TNRC6C	0.48	21.8	6.45e-147
0	Immune cells	CD4Tconv	CD4Tconv	TSPYL2	0.58	25.5	1.11e-146
0	Immune cells	CD4Tconv	CD4Tconv	SLC37A1	-0.25	3.4	1.29e-146
0	Immune cells	CD4Tconv	CD4Tconv	HES6	-0.28	1.9	1.58e-146
0	Immune cells	CD4Tconv	CD4Tconv	CNKSR3	-0.3	0.3	4.17e-146
0	Immune cells	CD4Tconv	CD4Tconv	C1QTNF12	-0.32	0.1	9.01e-146
0	Immune cells	CD4Tconv	CD4Tconv	AL390719.2	-0.31	0.2	1.31e-145
0	Immune cells	CD4Tconv	CD4Tconv	TMEM173	0.48	20.9	1.69e-145
0	Immune cells	CD4Tconv	CD4Tconv	EGLN3	-0.3	0.9	1.8e-145
0	Immune cells	CD4Tconv	CD4Tconv	UNC13B	-0.25	0.1	3.06e-145
0	Immune cells	CD4Tconv	CD4Tconv	RHOU	-0.28	1	3.49e-145
0	Immune cells	CD4Tconv	CD4Tconv	SOD3	-0.42	0.3	3.77e-145
0	Immune cells	CD4Tconv	CD4Tconv	PLPP1	-0.3	2.9	7.15e-145
0	Immune cells	CD4Tconv	CD4Tconv	PSME1	0.48	57.8	2.06e-144
0	Immune cells	CD4Tconv	CD4Tconv	CD14	-0.57	0.7	3.29e-144
0	Immune cells	CD4Tconv	CD4Tconv	PDE3B	0.47	19.6	5.59e-144
0	Immune cells	CD4Tconv	CD4Tconv	EPHA2	-0.26	0.4	1.73e-142
0	Immune cells	CD4Tconv	CD4Tconv	BCL2	0.54	24.9	2.21e-142
0	Immune cells	CD4Tconv	CD4Tconv	AKAP13	0.48	58	2.21e-142
0	Immune cells	CD4Tconv	CD4Tconv	EDN3	-0.29	0.2	2.43e-142
0	Immune cells	CD4Tconv	CD4Tconv	SUSD3	0.35	13.1	7.27e-142
0	Immune cells	CD4Tconv	CD4Tconv	MYLK	-0.37	0.2	9.94e-142
0	Immune cells	CD4Tconv	CD4Tconv	FOSB	0.39	77.2	1.01e-140
0	Immune cells	CD4Tconv	CD4Tconv	KIAA1551	0.51	23.6	1.87e-140
0	Immune cells	CD4Tconv	CD4Tconv	CD177	-0.94	2.1	2.01e-140
0	Immune cells	CD4Tconv	CD4Tconv	EPAS1	-0.29	3.9	2.19e-140
0	Immune cells	CD4Tconv	CD4Tconv	AC015912.3	-0.28	1.2	2.23e-140
0	Immune cells	CD4Tconv	CD4Tconv	TBC1D4	0.62	19.7	4.29e-140
0	Immune cells	CD4Tconv	CD4Tconv	TIMP1	-0.79	15.8	4.82e-140
0	Immune cells	CD4Tconv	CD4Tconv	B3GNT7	-0.34	1.6	2.57e-139
0	Immune cells	CD4Tconv	CD4Tconv	TRIM22	0.33	11.6	3.33e-139
0	Immune cells	CD4Tconv	CD4Tconv	LPIN2	0.51	34.2	3.59e-139
0	Immune cells	CD4Tconv	CD4Tconv	MIER3	-0.32	4.1	4.84e-139
0	Immune cells	CD4Tconv	CD4Tconv	GNE	-0.27	1.8	5.15e-139
0	Immune cells	CD4Tconv	CD4Tconv	TNFSF10	-0.33	15.6	1.65e-138
0	Immune cells	CD4Tconv	CD4Tconv	SPINK4	-2.23	2.4	2.23e-138
0	Immune cells	CD4Tconv	CD4Tconv	VPS13A	-0.27	9.1	2.3e-138
0	Immune cells	CD4Tconv	CD4Tconv	SCP2	-0.26	25.9	7.48e-138
0	Immune cells	CD4Tconv	CD4Tconv	GIMAP2	0.35	13	6.29e-137
0	Immune cells	CD4Tconv	CD4Tconv	TNFRSF25	0.42	20	4.82e-136
0	Immune cells	CD4Tconv	CD4Tconv	MXD1	-0.28	7.5	6.43e-136
0	Immune cells	CD4Tconv	CD4Tconv	CBLB	0.5	22.8	9.71e-136
0	Immune cells	CD4Tconv	CD4Tconv	LYZ	-1.77	5.8	3.34e-135
0	Immune cells	CD4Tconv	CD4Tconv	SAP18	0.43	65.7	1.11e-134
0	Immune cells	CD4Tconv	CD4Tconv	GBP4	0.38	14.8	1.54e-134
0	Immune cells	CD4Tconv	CD4Tconv	ZBTB1	0.56	29.5	6.39e-134
0	Immune cells	CD4Tconv	CD4Tconv	MTRNR2L8	-0.27	1.5	7.74e-134
0	Immune cells	CD4Tconv	CD4Tconv	BTG3	0.68	31	1.29e-132
0	Immune cells	CD4Tconv	CD4Tconv	ITM2B	0.33	64.1	4.69e-132
0	Immune cells	CD4Tconv	CD4Tconv	DDX24	0.54	28.7	2.21e-131
0	Immune cells	CD4Tconv	CD4Tconv	HIST1H2AG	-0.33	2	2.72e-131
0	Immune cells	CD4Tconv	CD4Tconv	MDFIC	0.53	23.6	5.87e-131
0	Immune cells	CD4Tconv	CD4Tconv	RHOC	-0.47	21.9	3.52e-130
0	Immune cells	CD4Tconv	CD4Tconv	AL355075.4	-0.38	2.9	9.33e-130
0	Immune cells	CD4Tconv	CD4Tconv	PAXX	0.54	38.7	1.18e-129
0	Immune cells	CD4Tconv	CD4Tconv	RNF139	0.54	28.2	1.19e-129
0	Immune cells	CD4Tconv	CD4Tconv	AC114760.2	0.32	10.3	1.21e-129
0	Immune cells	CD4Tconv	CD4Tconv	SATB1	0.53	25.5	6.63e-128
0	Immune cells	CD4Tconv	CD4Tconv	HSPD1	0.62	59.2	7.04e-127
0	Immune cells	CD4Tconv	CD4Tconv	TP53INP2	-0.29	4.6	2.01e-126
0	Immune cells	CD4Tconv	CD4Tconv	NDUFA1	-0.3	47.9	3.03e-126
0	Immune cells	CD4Tconv	CD4Tconv	AL137077.2	-0.35	1.2	4.22e-126
0	Immune cells	CD4Tconv	CD4Tconv	SLAMF6	0.33	10.6	1.44e-125
0	Immune cells	CD4Tconv	CD4Tconv	PI3	-0.79	1.1	8.18e-125
0	Immune cells	CD4Tconv	CD4Tconv	FKBP5	0.59	36.9	1.1e-124
0	Immune cells	CD4Tconv	CD4Tconv	HMGB2	0.4	41.2	1.67e-124
0	Immune cells	CD4Tconv	CD4Tconv	PRMT9	0.47	23.2	1.32e-123
0	Immune cells	CD4Tconv	CD4Tconv	LPXN	0.46	21.7	2.36e-122
0	Immune cells	CD4Tconv	CD4Tconv	CXCL3	-0.58	1.2	3.39e-122
0	Immune cells	CD4Tconv	CD4Tconv	PTMS	-0.26	12.3	3.86e-122
0	Immune cells	CD4Tconv	CD4Tconv	GZMB	0.31	11.7	5.99e-122
0	Immune cells	CD4Tconv	CD4Tconv	UBB	0.28	90.2	1.46e-121
0	Immune cells	CD4Tconv	CD4Tconv	LYAR	0.58	22	1.6e-121
0	Immune cells	CD4Tconv	CD4Tconv	CHORDC1	0.58	29.7	1.45e-120
0	Immune cells	CD4Tconv	CD4Tconv	PGK1	0.47	50	2.42e-120
0	Immune cells	CD4Tconv	CD4Tconv	CHST11	0.45	19	2.69e-120
0	Immune cells	CD4Tconv	CD4Tconv	DHX36	0.53	43	2.9e-120
0	Immune cells	CD4Tconv	CD4Tconv	MPZL3	0.39	13.7	4.33e-120
0	Immune cells	CD4Tconv	CD4Tconv	ELOVL5	0.45	20	7.84e-120
0	Immune cells	CD4Tconv	CD4Tconv	LIMS1	0.52	36.7	4.98e-119
0	Immune cells	CD4Tconv	CD4Tconv	PRDM1	0.66	38.2	8.24e-119
0	Immune cells	CD4Tconv	CD4Tconv	CARD16	0.61	31.3	9.42e-119
0	Immune cells	CD4Tconv	CD4Tconv	ANXA11	-0.25	27.2	1.02e-118
0	Immune cells	CD4Tconv	CD4Tconv	PCCA	-0.35	3	1.93e-117
0	Immune cells	CD4Tconv	CD4Tconv	RAN	0.41	54	3.44e-117
0	Immune cells	CD4Tconv	CD4Tconv	ATP6V0E1	0.4	57.9	4.37e-117
0	Immune cells	CD4Tconv	CD4Tconv	HNRNPDL	0.42	56.8	5.56e-117
0	Immune cells	CD4Tconv	CD4Tconv	CNBP	0.42	55.7	1.2e-115
0	Immune cells	CD4Tconv	CD4Tconv	SYTL2	-0.39	12.5	6.43e-115
0	Immune cells	CD4Tconv	CD4Tconv	RAB27A	0.46	28.5	8.51e-115
0	Immune cells	CD4Tconv	CD4Tconv	SASH3	0.36	14.5	3.1e-114
0	Immune cells	CD4Tconv	CD4Tconv	PRPF38B	0.49	49.4	1.33e-112
0	Immune cells	CD4Tconv	CD4Tconv	CCR7	0.36	13.7	2.5e-112
0	Immune cells	CD4Tconv	CD4Tconv	MXI1	-0.25	10.6	2.61e-112
0	Immune cells	CD4Tconv	CD4Tconv	SGTB	0.32	11.5	4.24e-112
0	Immune cells	CD4Tconv	CD4Tconv	TNFSF13B	0.39	13.5	6.11e-112
0	Immune cells	CD4Tconv	CD4Tconv	JUN	-0.26	78.6	5.73e-111
0	Immune cells	CD4Tconv	CD4Tconv	SMCHD1	0.44	52.6	2.62e-110
0	Immune cells	CD4Tconv	CD4Tconv	MT1F	-0.32	5.6	1.63e-109
0	Immune cells	CD4Tconv	CD4Tconv	PMAIP1	0.61	40.2	3.85e-109
0	Immune cells	CD4Tconv	CD4Tconv	HIST1H2BH	-0.29	2.7	4.29e-109
0	Immune cells	CD4Tconv	CD4Tconv	AKIRIN1	0.53	34.2	5.33e-109
0	Immune cells	CD4Tconv	CD4Tconv	ATP6V1G1	0.38	57.9	6.65e-109
0	Immune cells	CD4Tconv	CD4Tconv	CCND3	0.47	27.5	8.21e-109
0	Immune cells	CD4Tconv	CD4Tconv	IRF8	-0.28	2.2	8.77e-109
0	Immune cells	CD4Tconv	CD4Tconv	CLK1	0.51	45.7	1.16e-108
0	Immune cells	CD4Tconv	CD4Tconv	FLNA	0.38	27	1.34e-108
0	Immune cells	CD4Tconv	CD4Tconv	MT1X	-0.72	17.5	2.55e-108
0	Immune cells	CD4Tconv	CD4Tconv	CDC42SE1	0.52	35	5.77e-108
0	Immune cells	CD4Tconv	CD4Tconv	RCSD1	0.41	20.9	1.02e-107
0	Immune cells	CD4Tconv	CD4Tconv	YWHAB	0.34	68.4	1.23e-107
0	Immune cells	CD4Tconv	CD4Tconv	CXCL2	-0.64	1.5	2.28e-107
0	Immune cells	CD4Tconv	CD4Tconv	PPM1K	0.52	27	6.12e-107
0	Immune cells	CD4Tconv	CD4Tconv	RPL22	0.32	62.9	1.66e-105
0	Immune cells	CD4Tconv	CD4Tconv	PSMA7	0.31	65.1	3.04e-105
0	Immune cells	CD4Tconv	CD4Tconv	CEP85L	0.41	16.1	4.94e-105
0	Immune cells	CD4Tconv	CD4Tconv	DEF6	0.42	19.9	6.16e-104
0	Immune cells	CD4Tconv	CD4Tconv	COX6B1	-0.29	54.1	7.6e-104
0	Immune cells	CD4Tconv	CD4Tconv	DRAP1	0.52	43.2	1.41e-103
0	Immune cells	CD4Tconv	CD4Tconv	GPR155	0.44	16.8	3.26e-103
0	Immune cells	CD4Tconv	CD4Tconv	ZNF267	0.5	21.7	4.06e-103
0	Immune cells	CD4Tconv	CD4Tconv	DUSP16	0.48	21.2	4.51e-103
0	Immune cells	CD4Tconv	CD4Tconv	ORAI1	0.45	19.5	8.52e-103
0	Immune cells	CD4Tconv	CD4Tconv	ITGA1	0.45	16.8	8.87e-103
0	Immune cells	CD4Tconv	CD4Tconv	SSR4	-0.79	63.7	3.53e-102
0	Immune cells	CD4Tconv	CD4Tconv	IFI44	0.32	11.2	3.96e-101
0	Immune cells	CD4Tconv	CD4Tconv	SCD	-0.32	2.6	8.65e-100
0	Immune cells	CD4Tconv	CD4Tconv	DIAPH1	0.49	34	9.57e-100
0	Immune cells	CD4Tconv	CD4Tconv	EIF3E	0.33	57.1	1.95e-99
0	Immune cells	CD4Tconv	CD4Tconv	HLA-F	0.48	40.4	3.11e-99
0	Immune cells	CD4Tconv	CD4Tconv	ANP32E	0.49	25.9	7.67e-99
0	Immune cells	CD4Tconv	CD4Tconv	FAS	0.44	17.3	9.09e-99
0	Immune cells	CD4Tconv	CD4Tconv	TLN1	0.46	43.1	9.46e-99
0	Immune cells	CD4Tconv	CD4Tconv	ZFP36L1	0.4	53	1.97e-98
0	Immune cells	CD4Tconv	CD4Tconv	SP140	0.36	15.1	1.19e-97
0	Immune cells	CD4Tconv	CD4Tconv	ST3GAL1	0.43	18.4	4.33e-97
0	Immune cells	CD4Tconv	CD4Tconv	SLC20A1	-0.28	13.5	5.86e-96
0	Immune cells	CD4Tconv	CD4Tconv	FAM49B	0.44	29.5	1.77e-95
0	Immune cells	CD4Tconv	CD4Tconv	PASK	0.31	10.7	3.2e-95
0	Immune cells	CD4Tconv	CD4Tconv	UBE2B	0.49	48.7	6.15e-95
0	Immune cells	CD4Tconv	CD4Tconv	DEDD2	0.56	29.1	6.6e-95
0	Immune cells	CD4Tconv	CD4Tconv	RBPJ	0.66	33.7	9.46e-95
0	Immune cells	CD4Tconv	CD4Tconv	CASP8	0.42	19	1.48e-94
0	Immune cells	CD4Tconv	CD4Tconv	NCKAP1L	0.41	19.8	1.8e-94
0	Immune cells	CD4Tconv	CD4Tconv	IL10RA	0.46	21.7	4.48e-94
0	Immune cells	CD4Tconv	CD4Tconv	EIF5	0.38	61.5	7.89e-94
0	Immune cells	CD4Tconv	CD4Tconv	PAK2	0.47	45.1	4.47e-93
0	Immune cells	CD4Tconv	CD4Tconv	RBM8A	0.5	35.3	5.91e-93
0	Immune cells	CD4Tconv	CD4Tconv	ATP6V0E2	0.28	10.7	6.43e-93
0	Immune cells	CD4Tconv	CD4Tconv	NR4A3	0.45	23.7	1.63e-92
0	Immune cells	CD4Tconv	CD4Tconv	SAMHD1	0.37	23.1	2.96e-92
0	Immune cells	CD4Tconv	CD4Tconv	COX7B	-0.29	49.1	5.7e-92
0	Immune cells	CD4Tconv	CD4Tconv	PTTG1	0.36	17.8	6.03e-92
0	Immune cells	CD4Tconv	CD4Tconv	CCSER2	0.48	26.6	9.39e-92
0	Immune cells	CD4Tconv	CD4Tconv	IDI1	0.47	41.6	1.22e-91
0	Immune cells	CD4Tconv	CD4Tconv	ACTR3	0.41	51.9	2.77e-91
0	Immune cells	CD4Tconv	CD4Tconv	PDE7A	0.39	18.3	5.58e-91
0	Immune cells	CD4Tconv	CD4Tconv	TIFA	0.59	20.8	1.5e-89
0	Immune cells	CD4Tconv	CD4Tconv	SEC11C	-0.34	26	1.71e-89
0	Immune cells	CD4Tconv	CD4Tconv	ARF6	0.44	47.9	1.78e-89
0	Immune cells	CD4Tconv	CD4Tconv	KDM6B	0.48	44.5	2.22e-89
0	Immune cells	CD4Tconv	CD4Tconv	BZW1	0.52	36.5	3.14e-89
0	Immune cells	CD4Tconv	CD4Tconv	FGL2	-0.41	2.9	4.73e-89
0	Immune cells	CD4Tconv	CD4Tconv	CEMIP2	0.5	39	6.44e-88
0	Immune cells	CD4Tconv	CD4Tconv	CEBPB	-0.25	25.9	9.65e-88
0	Immune cells	CD4Tconv	CD4Tconv	TXNIP	0.44	74.2	2.08e-87
0	Immune cells	CD4Tconv	CD4Tconv	PTPN4	0.42	16.8	7.86e-87
0	Immune cells	CD4Tconv	CD4Tconv	HECA	0.49	29.5	8.29e-87
0	Immune cells	CD4Tconv	CD4Tconv	EVI2B	0.44	32.2	2.01e-86
0	Immune cells	CD4Tconv	CD4Tconv	ARHGAP25	0.32	12.8	6.93e-85
0	Immune cells	CD4Tconv	CD4Tconv	MORF4L1	0.43	48.8	1.35e-84
0	Immune cells	CD4Tconv	CD4Tconv	CRYBG1	0.53	31.8	2.17e-84
0	Immune cells	CD4Tconv	CD4Tconv	CKS2	0.46	30.7	3.75e-84
0	Immune cells	CD4Tconv	CD4Tconv	TENT5C	0.42	43.5	3.92e-84
0	Immune cells	CD4Tconv	CD4Tconv	ABI3	0.29	11	5.02e-84
0	Immune cells	CD4Tconv	CD4Tconv	INPP4B	0.36	16.2	7.75e-84
0	Immune cells	CD4Tconv	CD4Tconv	SERTAD1	0.5	45.2	2.23e-83
0	Immune cells	CD4Tconv	CD4Tconv	HNRNPA1	0.44	45.4	6.03e-83
0	Immune cells	CD4Tconv	CD4Tconv	FGFR1OP2	0.51	33.2	1.76e-82
0	Immune cells	CD4Tconv	CD4Tconv	TGFB1	0.46	22.3	1.06e-81
0	Immune cells	CD4Tconv	CD4Tconv	HPGD	-0.33	9.3	6.33e-81
0	Immune cells	CD4Tconv	CD4Tconv	STAM	0.46	16.5	9.68e-81
0	Immune cells	CD4Tconv	CD4Tconv	FOSL2	0.47	39.2	3.68e-80
0	Immune cells	CD4Tconv	CD4Tconv	OLFM4	-1.11	2.9	2.52e-79
0	Immune cells	CD4Tconv	CD4Tconv	CASP4	0.47	25.5	4.04e-78
0	Immune cells	CD4Tconv	CD4Tconv	KLF12	0.36	14.4	9.05e-78
0	Immune cells	CD4Tconv	CD4Tconv	KMT2E	0.45	49.2	3.3e-77
0	Immune cells	CD4Tconv	CD4Tconv	HNRNPF	0.39	48.4	6.31e-77
0	Immune cells	CD4Tconv	CD4Tconv	ZFAS1	0.33	51	9.86e-77
0	Immune cells	CD4Tconv	CD4Tconv	NCK2	0.45	26.3	1.18e-76
0	Immune cells	CD4Tconv	CD4Tconv	KCNAB2	0.29	10.7	3.11e-76
0	Immune cells	CD4Tconv	CD4Tconv	HLA-DQA1	-0.38	3	1.09e-75
0	Immune cells	CD4Tconv	CD4Tconv	MYCBP2	0.47	40	1.77e-75
0	Immune cells	CD4Tconv	CD4Tconv	CYLD	0.41	18.4	4.29e-75
0	Immune cells	CD4Tconv	CD4Tconv	GBP1	0.38	18.8	5.31e-75
0	Immune cells	CD4Tconv	CD4Tconv	SELL	0.26	11.5	7.82e-75
0	Immune cells	CD4Tconv	CD4Tconv	SYNE1	0.41	17.5	4.04e-74
0	Immune cells	CD4Tconv	CD4Tconv	HNRNPK	0.29	62.7	5.29e-74
0	Immune cells	CD4Tconv	CD4Tconv	SS18L2	0.47	27.2	5.37e-73
0	Immune cells	CD4Tconv	CD4Tconv	ZDBF2	0.39	13.5	3.61e-72
0	Immune cells	CD4Tconv	CD4Tconv	AQP3	0.46	20.4	9.94e-72
0	Immune cells	CD4Tconv	CD4Tconv	SOCS3	0.39	38.3	2.92e-71
0	Immune cells	CD4Tconv	CD4Tconv	CDC42EP3	0.4	22.8	8.04e-71
0	Immune cells	CD4Tconv	CD4Tconv	CDC14A	0.29	12.1	3.85e-70
0	Immune cells	CD4Tconv	CD4Tconv	FERMT3	0.39	20.2	3.97e-70
0	Immune cells	CD4Tconv	CD4Tconv	DENND2D	0.4	18.3	7.26e-70
0	Immune cells	CD4Tconv	CD4Tconv	CCL20	0.77	19.3	8.13e-70
0	Immune cells	CD4Tconv	CD4Tconv	MALT1	0.46	26.9	1.27e-69
0	Immune cells	CD4Tconv	CD4Tconv	RASA2	0.47	29	2.81e-69
0	Immune cells	CD4Tconv	CD4Tconv	RGS14	0.31	12.6	4.48e-69
0	Immune cells	CD4Tconv	CD4Tconv	PABPC1	0.34	46.3	5.98e-69
0	Immune cells	CD4Tconv	CD4Tconv	FTL	-0.56	94.2	6.84e-69
0	Immune cells	CD4Tconv	CD4Tconv	RFLNB	0.33	12.6	1.4e-68
0	Immune cells	CD4Tconv	CD4Tconv	DOCK11	0.34	13.6	1.7e-68
0	Immune cells	CD4Tconv	CD4Tconv	HIPK1	0.47	28.7	4.15e-68
0	Immune cells	CD4Tconv	CD4Tconv	AKIRIN2	0.48	25.5	1.37e-67
0	Immune cells	CD4Tconv	CD4Tconv	HEXIM1	-0.38	37.4	1.41e-67
0	Immune cells	CD4Tconv	CD4Tconv	SFPQ	0.38	50.5	2.92e-67
0	Immune cells	CD4Tconv	CD4Tconv	ATP5MG	0.31	59.4	6.42e-67
0	Immune cells	CD4Tconv	CD4Tconv	PER1	0.42	24.3	6.96e-67
0	Immune cells	CD4Tconv	CD4Tconv	TERF2IP	0.4	19.1	8.36e-67
0	Immune cells	CD4Tconv	CD4Tconv	GTF3A	0.47	38.1	8.92e-67
0	Immune cells	CD4Tconv	CD4Tconv	ROCK1	0.44	40.4	9.14e-67
0	Immune cells	CD4Tconv	CD4Tconv	CDKN2D	0.34	14.4	1.08e-66
0	Immune cells	CD4Tconv	CD4Tconv	MYH9	0.31	54.5	1.41e-66
0	Immune cells	CD4Tconv	CD4Tconv	EIF3K	0.3	60	4.06e-66
0	Immune cells	CD4Tconv	CD4Tconv	SSBP4	0.41	21.6	4.08e-66
0	Immune cells	CD4Tconv	CD4Tconv	BIRC3	0.44	26.1	8.84e-65
0	Immune cells	CD4Tconv	CD4Tconv	AC004687.1	0.36	19.1	1.07e-64
0	Immune cells	CD4Tconv	CD4Tconv	TIPARP	0.53	31.5	1.08e-64
0	Immune cells	CD4Tconv	CD4Tconv	CMC2	0.46	25.3	6.55e-64
0	Immune cells	CD4Tconv	CD4Tconv	STAT5A	0.34	14	1.15e-63
0	Immune cells	CD4Tconv	CD4Tconv	TUBA4A	0.56	38.4	1.18e-63
0	Immune cells	CD4Tconv	CD4Tconv	C12orf57	0.39	48	1.21e-63
0	Immune cells	CD4Tconv	CD4Tconv	RBM25	0.34	56.3	1.78e-63
0	Immune cells	CD4Tconv	CD4Tconv	KPNA2	0.45	21.1	5.95e-63
0	Immune cells	CD4Tconv	CD4Tconv	RBM39	0.3	60.4	9.48e-63
0	Immune cells	CD4Tconv	CD4Tconv	DUSP10	0.35	13.9	1.28e-62
0	Immune cells	CD4Tconv	CD4Tconv	CCDC85B	0.41	35.1	1.49e-62
0	Immune cells	CD4Tconv	CD4Tconv	PPP1R12A	0.43	38.6	4.58e-62
0	Immune cells	CD4Tconv	CD4Tconv	PAIP2	0.49	35.3	7.14e-62
0	Immune cells	CD4Tconv	CD4Tconv	AMD1	0.38	48.3	1.44e-61
0	Immune cells	CD4Tconv	CD4Tconv	NXT1	0.44	20.9	2.61e-60
0	Immune cells	CD4Tconv	CD4Tconv	SLC38A1	0.41	40.9	3.91e-60
0	Immune cells	CD4Tconv	CD4Tconv	ARHGEF1	0.26	10.7	3.38e-59
0	Immune cells	CD4Tconv	CD4Tconv	SH3KBP1	0.42	40	3.85e-58
0	Immune cells	CD4Tconv	CD4Tconv	MYO1F	0.27	10.8	4.73e-58
0	Immune cells	CD4Tconv	CD4Tconv	SP110	0.38	25.6	4.96e-58
0	Immune cells	CD4Tconv	CD4Tconv	PDE4A	0.45	17.6	1.42e-57
0	Immune cells	CD4Tconv	CD4Tconv	HNRNPLL	0.39	15.7	2.39e-57
0	Immune cells	CD4Tconv	CD4Tconv	NAP1L4	0.48	33.1	6.37e-57
0	Immune cells	CD4Tconv	CD4Tconv	NOP58	0.48	33.1	7.6e-57
0	Immune cells	CD4Tconv	CD4Tconv	BTG2	0.31	66.3	3.49e-56
0	Immune cells	CD4Tconv	CD4Tconv	RPL41	0.37	50.9	6.53e-56
0	Immune cells	CD4Tconv	CD4Tconv	POLR3GL	0.43	23.6	1.23e-55
0	Immune cells	CD4Tconv	CD4Tconv	SPTY2D1	0.49	29	4.41e-55
0	Immune cells	CD4Tconv	CD4Tconv	NASP	0.43	31.4	9.79e-55
0	Immune cells	CD4Tconv	CD4Tconv	BST2	0.38	35.5	1.26e-54
0	Immune cells	CD4Tconv	CD4Tconv	PSIP1	0.4	25.4	1.37e-54
0	Immune cells	CD4Tconv	CD4Tconv	DDX6	0.44	36.6	6.25e-54
0	Immune cells	CD4Tconv	CD4Tconv	KIF2A	0.4	19.5	7.72e-54
0	Immune cells	CD4Tconv	CD4Tconv	DDX21	0.36	45.6	1.77e-53
0	Immune cells	CD4Tconv	CD4Tconv	EIF3F	0.38	45.3	3.21e-53
0	Immune cells	CD4Tconv	CD4Tconv	SERBP1	0.29	57.4	2.65e-52
0	Immune cells	CD4Tconv	CD4Tconv	RGS19	0.3	14	3.89e-52
0	Immune cells	CD4Tconv	CD4Tconv	MGAT4A	0.45	25	9.41e-52
0	Immune cells	CD4Tconv	CD4Tconv	ATP1B3	0.44	48.2	9.72e-52
0	Immune cells	CD4Tconv	CD4Tconv	RBL2	0.43	24.6	3.6e-51
0	Immune cells	CD4Tconv	CD4Tconv	UTRN	0.39	33.5	5.54e-51
0	Immune cells	CD4Tconv	CD4Tconv	TSPAN14	0.42	24.5	8.03e-51
0	Immune cells	CD4Tconv	CD4Tconv	CAPZA1	0.41	43.4	1.07e-50
0	Immune cells	CD4Tconv	CD4Tconv	CCDC88C	0.4	20.8	1.09e-50
0	Immune cells	CD4Tconv	CD4Tconv	TMEM50A	0.4	42.9	6.77e-50
0	Immune cells	CD4Tconv	CD4Tconv	TPM3	0.3	53	8.89e-50
0	Immune cells	CD4Tconv	CD4Tconv	HNRNPH1	0.34	58.2	1.61e-49
0	Immune cells	CD4Tconv	CD4Tconv	APOL3	0.27	10.8	1.9e-49
0	Immune cells	CD4Tconv	CD4Tconv	BIN1	0.35	19.4	2.39e-49
0	Immune cells	CD4Tconv	CD4Tconv	CD47	0.41	39.2	2.44e-49
0	Immune cells	CD4Tconv	CD4Tconv	ARRB2	0.31	16.4	4.46e-49
0	Immune cells	CD4Tconv	CD4Tconv	ZFAND5	0.38	48.3	4.92e-49
0	Immune cells	CD4Tconv	CD4Tconv	AHSA1	0.5	29.7	5.91e-49
0	Immune cells	CD4Tconv	CD4Tconv	SUN2	0.39	27.5	7.68e-49
0	Immune cells	CD4Tconv	CD4Tconv	EIF4A3	0.42	39.2	1.13e-48
0	Immune cells	CD4Tconv	CD4Tconv	EID1	0.36	42.7	1.83e-48
0	Immune cells	CD4Tconv	CD4Tconv	GSPT1	0.45	38.7	3.05e-48
0	Immune cells	CD4Tconv	CD4Tconv	LIX1L	0.29	11.7	6.79e-48
0	Immune cells	CD4Tconv	CD4Tconv	HNRNPA0	0.39	42.4	8.35e-48
0	Immune cells	CD4Tconv	CD4Tconv	NABP1	0.43	34.8	9.13e-48
0	Immune cells	CD4Tconv	CD4Tconv	EPC1	0.43	34.7	1.84e-46
0	Immune cells	CD4Tconv	CD4Tconv	PACS1	0.3	14.2	3.89e-46
0	Immune cells	CD4Tconv	CD4Tconv	GLIPR2	0.36	16.8	4.12e-46
0	Immune cells	CD4Tconv	CD4Tconv	HLA-B	0.41	37.1	9.01e-46
0	Immune cells	CD4Tconv	CD4Tconv	SNRPN	0.37	17.6	1.31e-45
0	Immune cells	CD4Tconv	CD4Tconv	FOXO1	0.29	13	1.5e-45
0	Immune cells	CD4Tconv	CD4Tconv	CHD3	0.35	22.6	4.25e-45
0	Immune cells	CD4Tconv	CD4Tconv	SLC7A5	0.43	19.6	4.81e-45
0	Immune cells	CD4Tconv	CD4Tconv	HLA-DRA	-1.79	15.3	5.33e-45
0	Immune cells	CD4Tconv	CD4Tconv	ERN1	0.45	18.1	8.51e-45
0	Immune cells	CD4Tconv	CD4Tconv	JMY	0.38	18.9	8.61e-45
0	Immune cells	CD4Tconv	CD4Tconv	C9orf78	0.43	31.4	1.1e-44
0	Immune cells	CD4Tconv	CD4Tconv	XRCC5	0.35	45.3	1.61e-44
0	Immune cells	CD4Tconv	CD4Tconv	COQ10B	0.42	24.8	5.08e-44
0	Immune cells	CD4Tconv	CD4Tconv	YWHAZ	0.29	56.3	1.05e-43
0	Immune cells	CD4Tconv	CD4Tconv	RPS6KA3	0.4	32.3	2.62e-43
0	Immune cells	CD4Tconv	CD4Tconv	MYO5A	0.31	13.2	2.68e-43
0	Immune cells	CD4Tconv	CD4Tconv	USP36	0.35	16.7	6.42e-43
0	Immune cells	CD4Tconv	CD4Tconv	TMC6	0.4	22.3	6.55e-43
0	Immune cells	CD4Tconv	CD4Tconv	HLA-DQB1	-0.31	4.7	9.04e-43
0	Immune cells	CD4Tconv	CD4Tconv	BUB3	0.41	24.7	2.56e-42
0	Immune cells	CD4Tconv	CD4Tconv	SRRM1	0.36	48.7	2.96e-42
0	Immune cells	CD4Tconv	CD4Tconv	BAZ1A	0.4	36.9	4.78e-42
0	Immune cells	CD4Tconv	CD4Tconv	SENP7	0.33	15.5	5.14e-42
0	Immune cells	CD4Tconv	CD4Tconv	MLLT6	0.38	25.6	5.33e-42
0	Immune cells	CD4Tconv	CD4Tconv	SH3BGRL	0.37	37.4	2.68e-41
0	Immune cells	CD4Tconv	CD4Tconv	SLC4A7	0.34	22.2	8.39e-41
0	Immune cells	CD4Tconv	CD4Tconv	ZEB1	0.29	12.8	1.16e-40
0	Immune cells	CD4Tconv	CD4Tconv	RHOF	0.27	19.8	1.47e-40
0	Immune cells	CD4Tconv	CD4Tconv	MRPL1	0.47	20.2	5.39e-40
0	Immune cells	CD4Tconv	CD4Tconv	ATM	0.4	24.6	1.22e-39
0	Immune cells	CD4Tconv	CD4Tconv	ARHGAP45	0.36	21.7	1.92e-39
0	Immune cells	CD4Tconv	CD4Tconv	DDX3Y	0.43	27.1	7.68e-39
0	Immune cells	CD4Tconv	CD4Tconv	HNRNPA2B1	0.27	57.7	1.29e-38
0	Immune cells	CD4Tconv	CD4Tconv	MT2A	-0.74	38.4	1.6e-38
0	Immune cells	CD4Tconv	CD4Tconv	CHD1	0.38	37.7	1.8e-38
0	Immune cells	CD4Tconv	CD4Tconv	ATF7IP	0.4	23.6	1.89e-38
0	Immune cells	CD4Tconv	CD4Tconv	SLC16A7	0.29	12.3	2.1e-38
0	Immune cells	CD4Tconv	CD4Tconv	HNRNPC	0.37	39.3	2.3e-38
0	Immune cells	CD4Tconv	CD4Tconv	INPP5D	0.28	13.7	6.63e-38
0	Immune cells	CD4Tconv	CD4Tconv	SMAD7	0.38	16.7	2.45e-37
0	Immune cells	CD4Tconv	CD4Tconv	LYSMD2	0.29	13.2	2.68e-37
0	Immune cells	CD4Tconv	CD4Tconv	SDCBP	0.33	40.2	5.87e-37
0	Immune cells	CD4Tconv	CD4Tconv	RSBN1	0.42	29.9	6.15e-37
0	Immune cells	CD4Tconv	CD4Tconv	MYLIP	0.43	27.2	8.77e-37
0	Immune cells	CD4Tconv	CD4Tconv	ZNRF1	0.28	10.8	1.1e-36
0	Immune cells	CD4Tconv	CD4Tconv	STAT5B	0.29	13.7	1.62e-36
0	Immune cells	CD4Tconv	CD4Tconv	CNTRL	0.34	17.9	3.53e-36
0	Immune cells	CD4Tconv	CD4Tconv	KAT2B	0.28	11.2	4.11e-36
0	Immune cells	CD4Tconv	CD4Tconv	EPB41	0.38	24	4.33e-36
0	Immune cells	CD4Tconv	CD4Tconv	SYNRG	0.41	25.9	5.32e-36
0	Immune cells	CD4Tconv	CD4Tconv	ZNF430	0.34	16.2	5.99e-36
0	Immune cells	CD4Tconv	CD4Tconv	KRR1	0.43	27.5	1.31e-35
0	Immune cells	CD4Tconv	CD4Tconv	MAP1LC3B	0.34	47	1.9e-35
0	Immune cells	CD4Tconv	CD4Tconv	TPR	0.36	43.9	2.7e-35
0	Immune cells	CD4Tconv	CD4Tconv	PHF11	0.37	17.9	1.04e-34
0	Immune cells	CD4Tconv	CD4Tconv	C4orf3	0.34	43.6	1.13e-34
0	Immune cells	CD4Tconv	CD4Tconv	CERK	0.36	19.2	1.64e-34
0	Immune cells	CD4Tconv	CD4Tconv	SELENOT	0.43	35	2.23e-34
0	Immune cells	CD4Tconv	CD4Tconv	MRFAP1	0.41	36.9	2.5e-34
0	Immune cells	CD4Tconv	CD4Tconv	TBCC	0.38	20.7	4.3e-34
0	Immune cells	CD4Tconv	CD4Tconv	TOPORS	0.43	28.6	7.4e-34
0	Immune cells	CD4Tconv	CD4Tconv	PHACTR2	0.28	13.3	1.9e-33
0	Immune cells	CD4Tconv	CD4Tconv	HLA-DPB1	-0.56	26.3	2.62e-33
0	Immune cells	CD4Tconv	CD4Tconv	TMX4	0.4	23	3.11e-33
0	Immune cells	CD4Tconv	CD4Tconv	BRK1	0.36	39.7	4.18e-33
0	Immune cells	CD4Tconv	CD4Tconv	ELK3	0.33	17.2	4.37e-33
0	Immune cells	CD4Tconv	CD4Tconv	OSBPL8	0.36	27.6	6.3e-33
0	Immune cells	CD4Tconv	CD4Tconv	BLOC1S2	0.36	19.5	1.33e-32
0	Immune cells	CD4Tconv	CD4Tconv	DDHD1	0.35	15.6	4.1e-32
0	Immune cells	CD4Tconv	CD4Tconv	FLI1	0.27	11.3	1.46e-31
0	Immune cells	CD4Tconv	CD4Tconv	TRMT112	0.4	38	2.38e-31
0	Immune cells	CD4Tconv	CD4Tconv	ASF1A	0.31	12.2	2.46e-31
0	Immune cells	CD4Tconv	CD4Tconv	HIST1H4C	-0.29	38.8	4.27e-31
0	Immune cells	CD4Tconv	CD4Tconv	CSK	0.34	22.7	5.14e-31
0	Immune cells	CD4Tconv	CD4Tconv	IER5	0.26	49.4	1.11e-30
0	Immune cells	CD4Tconv	CD4Tconv	CYTH1	0.37	28.7	2.47e-30
0	Immune cells	CD4Tconv	CD4Tconv	CCNH	0.33	14.3	2.7e-30
0	Immune cells	CD4Tconv	CD4Tconv	TNRC6B	0.36	43.4	4.06e-30
0	Immune cells	CD4Tconv	CD4Tconv	SET	0.26	49.2	5.86e-30
0	Immune cells	CD4Tconv	CD4Tconv	MRPS6	0.45	28.7	1.55e-29
0	Immune cells	CD4Tconv	CD4Tconv	IGKC	-3.66	79	1.84e-29
0	Immune cells	CD4Tconv	CD4Tconv	SP100	0.35	28.5	2.87e-29
0	Immune cells	CD4Tconv	CD4Tconv	RHOG	0.34	25.4	4.12e-28
0	Immune cells	CD4Tconv	CD4Tconv	SMARCA5	0.39	36.4	9.08e-28
0	Immune cells	CD4Tconv	CD4Tconv	LAX1	0.3	10.1	1.27e-27
0	Immune cells	CD4Tconv	CD4Tconv	HMGN1	0.29	46.5	1.72e-27
0	Immune cells	CD4Tconv	CD4Tconv	PRKX	0.3	14.2	1.81e-27
0	Immune cells	CD4Tconv	CD4Tconv	DCK	0.25	13.9	1.82e-27
0	Immune cells	CD4Tconv	CD4Tconv	DNMT1	0.31	20.1	1.88e-27
0	Immune cells	CD4Tconv	CD4Tconv	ARPP19	0.39	27.6	1.98e-27
0	Immune cells	CD4Tconv	CD4Tconv	C19orf53	0.32	45.5	2.56e-27
0	Immune cells	CD4Tconv	CD4Tconv	IGLC2	-3.61	33.7	2.93e-27
0	Immune cells	CD4Tconv	CD4Tconv	IQGAP1	0.31	43.5	3.34e-27
0	Immune cells	CD4Tconv	CD4Tconv	TAGLN2	0.29	50.9	3.56e-27
0	Immune cells	CD4Tconv	CD4Tconv	SLBP	0.36	21.3	6.99e-27
0	Immune cells	CD4Tconv	CD4Tconv	CXCL8	-1.07	6	1.61e-26
0	Immune cells	CD4Tconv	CD4Tconv	C9orf16	0.33	44.6	3.14e-26
0	Immune cells	CD4Tconv	CD4Tconv	TOX	0.26	11.3	3.39e-26
0	Immune cells	CD4Tconv	CD4Tconv	HERPUD2	0.37	19.4	5.04e-26
0	Immune cells	CD4Tconv	CD4Tconv	VAMP5	0.33	21	6.57e-26
0	Immune cells	CD4Tconv	CD4Tconv	GABARAPL1	0.35	17.2	6.63e-26
0	Immune cells	CD4Tconv	CD4Tconv	FRMD4B	0.41	16.7	6.89e-26
0	Immune cells	CD4Tconv	CD4Tconv	MACF1	0.36	32.3	7.67e-26
0	Immune cells	CD4Tconv	CD4Tconv	STAT1	0.4	18.1	9.79e-26
0	Immune cells	CD4Tconv	CD4Tconv	IRF4	0.44	17.2	1.03e-25
0	Immune cells	CD4Tconv	CD4Tconv	C11orf58	0.37	36.1	1.87e-25
0	Immune cells	CD4Tconv	CD4Tconv	EIF1B	0.32	36.7	4.3e-25
0	Immune cells	CD4Tconv	CD4Tconv	PITHD1	0.4	25	8.06e-25
0	Immune cells	CD4Tconv	CD4Tconv	CAPZB	0.3	44.2	8.49e-25
0	Immune cells	CD4Tconv	CD4Tconv	KIF3A	0.26	10.2	2.11e-24
0	Immune cells	CD4Tconv	CD4Tconv	IGLC3	-3.37	22.1	4.66e-24
0	Immune cells	CD4Tconv	CD4Tconv	METTL9	0.39	27.9	5.97e-24
0	Immune cells	CD4Tconv	CD4Tconv	DNAJB6	0.36	20.3	9.49e-24
0	Immune cells	CD4Tconv	CD4Tconv	LYST	0.34	16.9	1.21e-23
0	Immune cells	CD4Tconv	CD4Tconv	OAZ1	0.34	44.6	2.23e-23
0	Immune cells	CD4Tconv	CD4Tconv	ABHD17A	0.35	22.6	3.2e-23
0	Immune cells	CD4Tconv	CD4Tconv	SC5D	0.27	13.2	4.49e-23
0	Immune cells	CD4Tconv	CD4Tconv	VPS13C	0.34	36.6	5.54e-23
0	Immune cells	CD4Tconv	CD4Tconv	SNX6	0.33	37	5.59e-23
0	Immune cells	CD4Tconv	CD4Tconv	TGFBR2	0.31	24.3	8.51e-23
0	Immune cells	CD4Tconv	CD4Tconv	CD58	0.31	15.8	1.07e-22
0	Immune cells	CD4Tconv	CD4Tconv	PCNX1	0.29	14.3	2.58e-22
0	Immune cells	CD4Tconv	CD4Tconv	NFKBIZ	0.35	42.2	2.61e-22
0	Immune cells	CD4Tconv	CD4Tconv	GLS	0.36	29.9	3.62e-22
0	Immune cells	CD4Tconv	CD4Tconv	STX11	0.26	11.1	1.22e-21
0	Immune cells	CD4Tconv	CD4Tconv	KLF6	0.3	17.7	1.57e-21
0	Immune cells	CD4Tconv	CD4Tconv	MRPL18	0.48	30.5	3.81e-21
0	Immune cells	CD4Tconv	CD4Tconv	HIST1H1D	0.26	16.3	4.49e-21
0	Immune cells	CD4Tconv	CD4Tconv	RAP1B	0.38	24.4	1.07e-20
0	Immune cells	CD4Tconv	CD4Tconv	TBCB	0.34	22.8	2.16e-20
0	Immune cells	CD4Tconv	CD4Tconv	USP15	0.32	27.3	2.25e-20
0	Immune cells	CD4Tconv	CD4Tconv	PHF20	0.33	19.6	2.31e-20
0	Immune cells	CD4Tconv	CD4Tconv	HBP1	0.39	27	3.67e-20
0	Immune cells	CD4Tconv	CD4Tconv	PRPS1	0.26	10.8	3.82e-20
0	Immune cells	CD4Tconv	CD4Tconv	LNPEP	0.35	25.6	5.1e-20
0	Immune cells	CD4Tconv	CD4Tconv	MAPRE2	0.29	16.8	6.19e-20
0	Immune cells	CD4Tconv	CD4Tconv	ATRX	0.27	49	7.49e-20
0	Immune cells	CD4Tconv	CD4Tconv	SF3B1	0.28	47.9	9.8e-20
0	Immune cells	CD4Tconv	CD4Tconv	PLEKHA2	0.3	17.6	1.25e-19
0	Immune cells	CD4Tconv	CD4Tconv	ISCA1	0.35	18.3	1.52e-19
0	Immune cells	CD4Tconv	CD4Tconv	UBE2N	0.35	27.8	2.44e-19
0	Immune cells	CD4Tconv	CD4Tconv	STAT3	0.36	31.8	5.16e-19
0	Immune cells	CD4Tconv	CD4Tconv	ODC1	0.38	36.7	5.2e-19
0	Immune cells	CD4Tconv	CD4Tconv	GCHFR	0.33	19.4	9.13e-19
0	Immune cells	CD4Tconv	CD4Tconv	PPIG	0.34	41.9	9.13e-19
0	Immune cells	CD4Tconv	CD4Tconv	SNAPC1	0.28	12	1.05e-18
0	Immune cells	CD4Tconv	CD4Tconv	HERC1	0.32	21.5	1.15e-18
0	Immune cells	CD4Tconv	CD4Tconv	FURIN	0.35	18.2	1.18e-18
0	Immune cells	CD4Tconv	CD4Tconv	CHIC2	0.29	14.7	1.3e-18
0	Immune cells	CD4Tconv	CD4Tconv	HLA-DRB5	-0.45	9.5	2.73e-18
0	Immune cells	CD4Tconv	CD4Tconv	PPP2R5C	0.36	22.1	3.1e-18
0	Immune cells	CD4Tconv	CD4Tconv	ISCU	0.37	36.8	3.62e-18
0	Immune cells	CD4Tconv	CD4Tconv	SNRPB2	0.39	30.6	3.93e-18
0	Immune cells	CD4Tconv	CD4Tconv	CNN2	0.34	22.6	6.34e-18
0	Immune cells	CD4Tconv	CD4Tconv	RLF	0.33	23.2	6.35e-18
0	Immune cells	CD4Tconv	CD4Tconv	ST8SIA4	0.27	12.7	6.88e-18
0	Immune cells	CD4Tconv	CD4Tconv	EIF3H	0.27	44.6	7.15e-18
0	Immune cells	CD4Tconv	CD4Tconv	MEAF6	0.34	23.8	7.61e-18
0	Immune cells	CD4Tconv	CD4Tconv	EED	0.26	12.5	7.66e-18
0	Immune cells	CD4Tconv	CD4Tconv	TRA2B	0.33	41.5	8.74e-18
0	Immune cells	CD4Tconv	CD4Tconv	PLK3	0.26	13.5	1.04e-17
0	Immune cells	CD4Tconv	CD4Tconv	LGALS1	-0.27	27.7	1.18e-17
0	Immune cells	CD4Tconv	CD4Tconv	DNTTIP2	0.35	22.6	2.06e-17
0	Immune cells	CD4Tconv	CD4Tconv	SLFN11	0.27	10.4	2.19e-17
0	Immune cells	CD4Tconv	CD4Tconv	CSGALNACT2	0.29	15	2.32e-17
0	Immune cells	CD4Tconv	CD4Tconv	ITGAE	0.37	19.3	2.39e-17
0	Immune cells	CD4Tconv	CD4Tconv	CAMLG	0.37	27.3	2.78e-17
0	Immune cells	CD4Tconv	CD4Tconv	UBE2D2	0.37	29.8	8.99e-17
0	Immune cells	CD4Tconv	CD4Tconv	CTSC	0.36	26.1	9.08e-17
0	Immune cells	CD4Tconv	CD4Tconv	DENND4A	0.25	11.5	1.04e-16
0	Immune cells	CD4Tconv	CD4Tconv	RSL24D1	0.34	36.9	1.5e-16
0	Immune cells	CD4Tconv	CD4Tconv	PSME2	0.28	47.7	1.62e-16
0	Immune cells	CD4Tconv	CD4Tconv	STN1	0.26	13.6	1.79e-16
0	Immune cells	CD4Tconv	CD4Tconv	CCDC66	0.27	13	2.97e-16
0	Immune cells	CD4Tconv	CD4Tconv	YWHAQ	0.33	36.9	3.81e-16
0	Immune cells	CD4Tconv	CD4Tconv	DNAJC8	0.36	26.3	5.3e-16
0	Immune cells	CD4Tconv	CD4Tconv	MAGOH	0.37	27.9	5.41e-16
0	Immune cells	CD4Tconv	CD4Tconv	IK	0.34	31.4	7.58e-16
0	Immune cells	CD4Tconv	CD4Tconv	STIM2	0.3	16	4.47e-15
0	Immune cells	CD4Tconv	CD4Tconv	RBM38	0.28	19.5	4.49e-15
0	Immune cells	CD4Tconv	CD4Tconv	SMC3	0.35	28.3	5.39e-15
0	Immune cells	CD4Tconv	CD4Tconv	ARIH1	0.38	33.1	5.39e-15
0	Immune cells	CD4Tconv	CD4Tconv	TRAF3	0.31	17	8.44e-15
0	Immune cells	CD4Tconv	CD4Tconv	RAB29	0.27	11.5	8.6e-15
0	Immune cells	CD4Tconv	CD4Tconv	SNRPB	0.32	31.1	1.23e-14
0	Immune cells	CD4Tconv	CD4Tconv	UBXN1	0.34	32.1	1.54e-14
0	Immune cells	CD4Tconv	CD4Tconv	TAP1	0.34	28.6	1.88e-14
0	Immune cells	CD4Tconv	CD4Tconv	INPP4A	0.26	11.6	7.24e-14
0	Immune cells	CD4Tconv	CD4Tconv	MXD4	0.37	29.9	8.87e-14
0	Immune cells	CD4Tconv	CD4Tconv	NOP53	0.26	42.8	1.76e-13
0	Immune cells	CD4Tconv	CD4Tconv	SIPA1	0.27	14.9	1.77e-13
0	Immune cells	CD4Tconv	CD4Tconv	FOXP1	0.28	37.3	1.88e-13
0	Immune cells	CD4Tconv	CD4Tconv	CD82	0.26	15.4	1.93e-13
0	Immune cells	CD4Tconv	CD4Tconv	RAB21	0.35	30.6	2.36e-13
0	Immune cells	CD4Tconv	CD4Tconv	NSD3	0.3	41.5	2.39e-13
0	Immune cells	CD4Tconv	CD4Tconv	DAD1	0.28	43.9	2.66e-13
0	Immune cells	CD4Tconv	CD4Tconv	ESYT1	0.27	12.9	3.26e-13
0	Immune cells	CD4Tconv	CD4Tconv	EEF1D	0.26	45.6	3.77e-13
0	Immune cells	CD4Tconv	CD4Tconv	MIER1	0.32	29.2	4.05e-13
0	Immune cells	CD4Tconv	CD4Tconv	AIP	0.35	24.2	4.53e-13
0	Immune cells	CD4Tconv	CD4Tconv	TCP1	0.36	32.8	1.01e-12
0	Immune cells	CD4Tconv	CD4Tconv	POLR2K	0.39	28.8	1.33e-12
0	Immune cells	CD4Tconv	CD4Tconv	HSPA1A	0.77	55.5	1.42e-12
0	Immune cells	CD4Tconv	CD4Tconv	YME1L1	0.29	41.9	1.7e-12
0	Immune cells	CD4Tconv	CD4Tconv	FAM89B	0.34	17.3	2.24e-12
0	Immune cells	CD4Tconv	CD4Tconv	PIM1	0.33	20	2.62e-12
0	Immune cells	CD4Tconv	CD4Tconv	KMT2A	0.34	30.9	8.13e-12
0	Immune cells	CD4Tconv	CD4Tconv	NEK7	0.31	16.6	1.73e-11
0	Immune cells	CD4Tconv	CD4Tconv	CCT4	0.32	29.6	2.21e-11
0	Immune cells	CD4Tconv	CD4Tconv	ARID4A	0.34	28.1	2.55e-11
0	Immune cells	CD4Tconv	CD4Tconv	HNRNPM	0.29	39.4	2.63e-11
0	Immune cells	CD4Tconv	CD4Tconv	PKN1	0.27	13.9	3.44e-11
0	Immune cells	CD4Tconv	CD4Tconv	GABARAPL2	0.3	37.7	4.42e-11
0	Immune cells	CD4Tconv	CD4Tconv	DBF4	0.29	15.2	1.2e-10
0	Immune cells	CD4Tconv	CD4Tconv	JADE1	0.27	12.4	1.23e-10
0	Immune cells	CD4Tconv	CD4Tconv	C16orf54	0.28	11	1.27e-10
0	Immune cells	CD4Tconv	CD4Tconv	ETV3	0.28	15.3	1.41e-10
0	Immune cells	CD4Tconv	CD4Tconv	STRAP	0.33	26.9	1.68e-10
0	Immune cells	CD4Tconv	CD4Tconv	NDUFV2	0.34	38.7	1.83e-10
0	Immune cells	CD4Tconv	CD4Tconv	ZNRD1	0.32	21.5	2.04e-10
0	Immune cells	CD4Tconv	CD4Tconv	ERO1B	0.3	15.8	2.41e-10
0	Immune cells	CD4Tconv	CD4Tconv	CCDC59	0.34	21.9	3.09e-10
0	Immune cells	CD4Tconv	CD4Tconv	HLA-DPA1	-0.62	27.2	4.05e-10
0	Immune cells	CD4Tconv	CD4Tconv	MAT2A	0.29	32.6	1.1e-09
0	Immune cells	CD4Tconv	CD4Tconv	DDX18	0.28	41.3	2.28e-09
0	Immune cells	CD4Tconv	CD4Tconv	SNU13	0.26	42.5	3.56e-09
0	Immune cells	CD4Tconv	CD4Tconv	FBXO33	0.27	14.4	5.02e-09
0	Immune cells	CD4Tconv	CD4Tconv	WDR82	0.32	22.6	5.92e-09
0	Immune cells	CD4Tconv	CD4Tconv	RSRC2	0.27	44.1	8.86e-09
0	Immune cells	CD4Tconv	CD4Tconv	SPRY1	0.3	11.5	8.99e-09
0	Immune cells	CD4Tconv	CD4Tconv	YTHDC1	0.3	36.6	1.04e-08
0	Immune cells	CD4Tconv	CD4Tconv	DCTN6	0.32	17.7	1.29e-08
0	Immune cells	CD4Tconv	CD4Tconv	SAMD9L	0.25	14.9	2.1e-08
0	Immune cells	CD4Tconv	CD4Tconv	EIF3M	0.31	31.8	2.37e-08
0	Immune cells	CD4Tconv	CD4Tconv	RECQL	0.27	13.4	5.66e-08
0	Immune cells	CD4Tconv	CD4Tconv	RNF168	0.32	20.5	7.77e-08
0	Immune cells	CD4Tconv	CD4Tconv	SLTM	0.3	36	8.32e-08
0	Immune cells	CD4Tconv	CD4Tconv	AGO2	0.3	24.9	8.39e-08
0	Immune cells	CD4Tconv	CD4Tconv	KAT6A	0.3	23.2	8.47e-08
0	Immune cells	CD4Tconv	CD4Tconv	DCP2	0.26	15.9	9.24e-08
0	Immune cells	CD4Tconv	CD4Tconv	C6orf48	0.27	30.5	9.48e-08
0	Immune cells	CD4Tconv	CD4Tconv	STIP1	0.33	19.4	1.32e-07
0	Immune cells	CD4Tconv	CD4Tconv	PHF1	0.26	16.2	2.38e-07
0	Immune cells	CD4Tconv	CD4Tconv	PTPN1	0.32	26.6	2.77e-07
0	Immune cells	CD4Tconv	CD4Tconv	PCM1	0.29	31.7	4.08e-07
0	Immune cells	CD4Tconv	CD4Tconv	HSPA1B	0.44	50.1	4.42e-07
0	Immune cells	CD4Tconv	CD4Tconv	RANBP2	0.34	32.1	5.25e-07
0	Immune cells	CD4Tconv	CD4Tconv	CFLAR	0.31	40.3	1.52e-06
0	Immune cells	CD4Tconv	CD4Tconv	REX1BD	0.28	37.6	2.13e-06
0	Immune cells	CD4Tconv	CD4Tconv	NDFIP1	0.34	30.7	2.89e-06
0	Immune cells	CD4Tconv	CD4Tconv	HELZ	0.3	25.3	3.88e-06
0	Immune cells	CD4Tconv	CD4Tconv	PIM2	0.28	23.6	4.85e-06
0	Immune cells	CD4Tconv	CD4Tconv	IRS2	0.26	25.5	6.79e-06
0	Immune cells	CD4Tconv	CD4Tconv	UBE2L6	0.3	17.9	7.31e-06
1	Immune cells	CD4Tconv	CD4Tconv	IL7R	1.96	87.9	0
1	Immune cells	CD4Tconv	CD4Tconv	KLRB1	1.48	50.8	0
1	Immune cells	CD4Tconv	CD4Tconv	FYB1	1.44	74.4	0
1	Immune cells	CD4Tconv	CD4Tconv	TRBC1	1.39	53.8	0
1	Immune cells	CD4Tconv	CD4Tconv	LTB	1.38	66.8	0
1	Immune cells	CD4Tconv	CD4Tconv	CXCR4	1.36	90.9	0
1	Immune cells	CD4Tconv	CD4Tconv	CD3D	1.34	79.4	0
1	Immune cells	CD4Tconv	CD4Tconv	TRAC	1.33	71.6	0
1	Immune cells	CD4Tconv	CD4Tconv	TRBC2	1.32	62.5	0
1	Immune cells	CD4Tconv	CD4Tconv	CD3E	1.31	72	0
1	Immune cells	CD4Tconv	CD4Tconv	CD2	1.25	70.6	0
1	Immune cells	CD4Tconv	CD4Tconv	CD3G	1.23	64.3	0
1	Immune cells	CD4Tconv	CD4Tconv	BCL11B	1.21	50.8	0
1	Immune cells	CD4Tconv	CD4Tconv	PTPRC	1.18	87.2	0
1	Immune cells	CD4Tconv	CD4Tconv	SRGN	1.14	95.6	0
1	Immune cells	CD4Tconv	CD4Tconv	RGCC	1.14	55.6	0
1	Immune cells	CD4Tconv	CD4Tconv	TNFAIP3	1.14	76.2	0
1	Immune cells	CD4Tconv	CD4Tconv	TSC22D3	1.13	89.3	0
1	Immune cells	CD4Tconv	CD4Tconv	SARAF	1.12	81.5	0
1	Immune cells	CD4Tconv	CD4Tconv	CCR7	1.12	31.3	0
1	Immune cells	CD4Tconv	CD4Tconv	GPR183	1.11	54.6	0
1	Immune cells	CD4Tconv	CD4Tconv	JUNB	1.09	93.5	0
1	Immune cells	CD4Tconv	CD4Tconv	CD69	1.09	65.8	0
1	Immune cells	CD4Tconv	CD4Tconv	BTG1	1.08	98.6	0
1	Immune cells	CD4Tconv	CD4Tconv	CD48	1.08	69.6	0
1	Immune cells	CD4Tconv	CD4Tconv	ANXA1	1.08	44.6	0
1	Immune cells	CD4Tconv	CD4Tconv	SPOCK2	1.07	50.5	0
1	Immune cells	CD4Tconv	CD4Tconv	RPS27	1.06	99.8	0
1	Immune cells	CD4Tconv	CD4Tconv	GIMAP7	1.04	38	0
1	Immune cells	CD4Tconv	CD4Tconv	ARL4C	1.04	53.1	0
1	Immune cells	CD4Tconv	CD4Tconv	CREM	1.02	55.1	0
1	Immune cells	CD4Tconv	CD4Tconv	RPS27A	1.01	99.8	0
1	Immune cells	CD4Tconv	CD4Tconv	AC058791.1	1.01	53.5	0
1	Immune cells	CD4Tconv	CD4Tconv	CNOT6L	1.01	54.1	0
1	Immune cells	CD4Tconv	CD4Tconv	ETS1	1.01	47.5	0
1	Immune cells	CD4Tconv	CD4Tconv	RORA	0.99	41.6	0
1	Immune cells	CD4Tconv	CD4Tconv	RPS15A	0.99	99.6	0
1	Immune cells	CD4Tconv	CD4Tconv	RPS3A	0.98	99.1	0
1	Immune cells	CD4Tconv	CD4Tconv	ARHGDIB	0.98	72.9	0
1	Immune cells	CD4Tconv	CD4Tconv	PIK3IP1	0.97	40.9	0
1	Immune cells	CD4Tconv	CD4Tconv	RPS12	0.97	99.9	0
1	Immune cells	CD4Tconv	CD4Tconv	FXYD5	0.96	50.4	0
1	Immune cells	CD4Tconv	CD4Tconv	CD52	0.95	75.7	0
1	Immune cells	CD4Tconv	CD4Tconv	RPL30	0.95	98.3	0
1	Immune cells	CD4Tconv	CD4Tconv	ZNF331	0.93	51.7	0
1	Immune cells	CD4Tconv	CD4Tconv	RPS13	0.92	96.4	0
1	Immune cells	CD4Tconv	CD4Tconv	GMFG	0.92	57.4	0
1	Immune cells	CD4Tconv	CD4Tconv	ZC3HAV1	0.92	54.9	0
1	Immune cells	CD4Tconv	CD4Tconv	RPL32	0.92	99.8	0
1	Immune cells	CD4Tconv	CD4Tconv	RPL21	0.91	99.1	0
1	Immune cells	CD4Tconv	CD4Tconv	CLEC2D	0.91	42.2	0
1	Immune cells	CD4Tconv	CD4Tconv	FYN	0.91	43.2	0
1	Immune cells	CD4Tconv	CD4Tconv	ICOS	0.9	28.8	0
1	Immune cells	CD4Tconv	CD4Tconv	SMAP2	0.9	61	0
1	Immune cells	CD4Tconv	CD4Tconv	RPL34	0.9	99.5	0
1	Immune cells	CD4Tconv	CD4Tconv	LDHB	0.9	60.3	0
1	Immune cells	CD4Tconv	CD4Tconv	S100A4	0.9	70.3	0
1	Immune cells	CD4Tconv	CD4Tconv	RPLP1	0.89	100	0
1	Immune cells	CD4Tconv	CD4Tconv	CYTIP	0.89	60.8	0
1	Immune cells	CD4Tconv	CD4Tconv	RPL9	0.88	98.9	0
1	Immune cells	CD4Tconv	CD4Tconv	DNAJA1	0.88	81.3	0
1	Immune cells	CD4Tconv	CD4Tconv	AC026979.2	0.86	30.4	0
1	Immune cells	CD4Tconv	CD4Tconv	RPL10	0.86	99.7	0
1	Immune cells	CD4Tconv	CD4Tconv	CELF2	0.86	50.3	0
1	Immune cells	CD4Tconv	CD4Tconv	RPS25	0.85	77.9	0
1	Immune cells	CD4Tconv	CD4Tconv	STK17B	0.85	61.7	0
1	Immune cells	CD4Tconv	CD4Tconv	YPEL5	0.85	59.6	0
1	Immune cells	CD4Tconv	CD4Tconv	IKZF1	0.83	36.4	0
1	Immune cells	CD4Tconv	CD4Tconv	EIF1	0.83	96.4	0
1	Immune cells	CD4Tconv	CD4Tconv	RPL19	0.83	99.4	0
1	Immune cells	CD4Tconv	CD4Tconv	RPSA	0.83	96.6	0
1	Immune cells	CD4Tconv	CD4Tconv	ITM2A	0.82	37	0
1	Immune cells	CD4Tconv	CD4Tconv	RPS29	0.82	96.4	0
1	Immune cells	CD4Tconv	CD4Tconv	RPL39	0.81	67.8	0
1	Immune cells	CD4Tconv	CD4Tconv	RPL11	0.8	99.8	0
1	Immune cells	CD4Tconv	CD4Tconv	TXNIP	0.8	80.8	0
1	Immune cells	CD4Tconv	CD4Tconv	PASK	0.8	21.1	0
1	Immune cells	CD4Tconv	CD4Tconv	RPL23A	0.8	98.5	0
1	Immune cells	CD4Tconv	CD4Tconv	RPL27	0.8	93.6	0
1	Immune cells	CD4Tconv	CD4Tconv	HCST	0.8	51.7	0
1	Immune cells	CD4Tconv	CD4Tconv	TOMM7	0.79	88	0
1	Immune cells	CD4Tconv	CD4Tconv	RPLP2	0.79	99.2	0
1	Immune cells	CD4Tconv	CD4Tconv	ZFP36L2	0.79	91.6	0
1	Immune cells	CD4Tconv	CD4Tconv	RPS16	0.79	99.3	0
1	Immune cells	CD4Tconv	CD4Tconv	RPS20	0.79	96.7	0
1	Immune cells	CD4Tconv	CD4Tconv	TNFAIP8	0.78	40.2	0
1	Immune cells	CD4Tconv	CD4Tconv	LCK	0.78	36.2	0
1	Immune cells	CD4Tconv	CD4Tconv	CD40LG	0.78	19.7	0
1	Immune cells	CD4Tconv	CD4Tconv	UBA52	0.78	90.4	0
1	Immune cells	CD4Tconv	CD4Tconv	RPS28	0.78	98.5	0
1	Immune cells	CD4Tconv	CD4Tconv	RPL5	0.78	95.3	0
1	Immune cells	CD4Tconv	CD4Tconv	RPL37	0.77	99.7	0
1	Immune cells	CD4Tconv	CD4Tconv	ITK	0.77	24.3	0
1	Immune cells	CD4Tconv	CD4Tconv	RPS14	0.76	99.8	0
1	Immune cells	CD4Tconv	CD4Tconv	RPL28	0.76	99.7	0
1	Immune cells	CD4Tconv	CD4Tconv	RPS7	0.76	98.9	0
1	Immune cells	CD4Tconv	CD4Tconv	GIMAP4	0.76	27.9	0
1	Immune cells	CD4Tconv	CD4Tconv	ANKRD12	0.76	73.7	0
1	Immune cells	CD4Tconv	CD4Tconv	RPS6	0.76	99.7	0
1	Immune cells	CD4Tconv	CD4Tconv	RPL35A	0.76	99.1	0
1	Immune cells	CD4Tconv	CD4Tconv	SLA	0.75	34.1	0
1	Immune cells	CD4Tconv	CD4Tconv	CD28	0.75	23.8	0
1	Immune cells	CD4Tconv	CD4Tconv	CCR6	0.75	21.6	0
1	Immune cells	CD4Tconv	CD4Tconv	TRAT1	0.74	23.5	0
1	Immune cells	CD4Tconv	CD4Tconv	CD6	0.74	25.9	0
1	Immune cells	CD4Tconv	CD4Tconv	RPS19	0.74	99.9	0
1	Immune cells	CD4Tconv	CD4Tconv	RPL3	0.74	99.6	0
1	Immune cells	CD4Tconv	CD4Tconv	DDX5	0.74	94.7	0
1	Immune cells	CD4Tconv	CD4Tconv	RPS4X	0.74	98.8	0
1	Immune cells	CD4Tconv	CD4Tconv	TPT1	0.73	100	0
1	Immune cells	CD4Tconv	CD4Tconv	RASGRP1	0.73	27.7	0
1	Immune cells	CD4Tconv	CD4Tconv	RPL6	0.73	98	0
1	Immune cells	CD4Tconv	CD4Tconv	SLC2A3	0.73	38.1	0
1	Immune cells	CD4Tconv	CD4Tconv	CTLA4	0.72	19.9	0
1	Immune cells	CD4Tconv	CD4Tconv	RPS23	0.72	97.5	0
1	Immune cells	CD4Tconv	CD4Tconv	PNRC1	0.72	72.7	0
1	Immune cells	CD4Tconv	CD4Tconv	RPL13	0.72	99.8	0
1	Immune cells	CD4Tconv	CD4Tconv	RPS3	0.72	90.5	0
1	Immune cells	CD4Tconv	CD4Tconv	RPL10A	0.72	97.8	0
1	Immune cells	CD4Tconv	CD4Tconv	SKAP1	0.72	30.7	0
1	Immune cells	CD4Tconv	CD4Tconv	RPS10	0.71	80	0
1	Immune cells	CD4Tconv	CD4Tconv	RPL38	0.71	90	0
1	Immune cells	CD4Tconv	CD4Tconv	SELL	0.7	19.6	0
1	Immune cells	CD4Tconv	CD4Tconv	NAP1L1	0.7	64.4	0
1	Immune cells	CD4Tconv	CD4Tconv	TMSB4X	0.69	99.9	0
1	Immune cells	CD4Tconv	CD4Tconv	EEF1B2	0.69	92.6	0
1	Immune cells	CD4Tconv	CD4Tconv	PFDN5	0.69	91	0
1	Immune cells	CD4Tconv	CD4Tconv	APBB1IP	0.69	33.9	0
1	Immune cells	CD4Tconv	CD4Tconv	RPL22	0.69	69.5	0
1	Immune cells	CD4Tconv	CD4Tconv	RPL24	0.67	98.4	0
1	Immune cells	CD4Tconv	CD4Tconv	CD7	0.67	41.4	0
1	Immune cells	CD4Tconv	CD4Tconv	LAT	0.67	24.7	0
1	Immune cells	CD4Tconv	CD4Tconv	FAU	0.67	98.6	0
1	Immune cells	CD4Tconv	CD4Tconv	NR4A2	0.66	61.2	0
1	Immune cells	CD4Tconv	CD4Tconv	HSPA8	0.66	75.2	0
1	Immune cells	CD4Tconv	CD4Tconv	RPS21	0.66	94.7	0
1	Immune cells	CD4Tconv	CD4Tconv	TIGIT	0.66	20.5	0
1	Immune cells	CD4Tconv	CD4Tconv	RPL18A	0.66	97.4	0
1	Immune cells	CD4Tconv	CD4Tconv	NACA	0.66	96.2	0
1	Immune cells	CD4Tconv	CD4Tconv	RPS8	0.66	98.6	0
1	Immune cells	CD4Tconv	CD4Tconv	RPL4	0.66	82.6	0
1	Immune cells	CD4Tconv	CD4Tconv	NPM1	0.65	71.8	0
1	Immune cells	CD4Tconv	CD4Tconv	RPL13A	0.65	99.6	0
1	Immune cells	CD4Tconv	CD4Tconv	LEF1	0.65	16.8	0
1	Immune cells	CD4Tconv	CD4Tconv	RPL14	0.64	97.9	0
1	Immune cells	CD4Tconv	CD4Tconv	CD37	0.63	52.5	0
1	Immune cells	CD4Tconv	CD4Tconv	CD247	0.63	27.4	0
1	Immune cells	CD4Tconv	CD4Tconv	JUND	0.62	91.7	0
1	Immune cells	CD4Tconv	CD4Tconv	RPL7	0.61	87.8	0
1	Immune cells	CD4Tconv	CD4Tconv	RPS5	0.6	97.3	0
1	Immune cells	CD4Tconv	CD4Tconv	RPS26	0.6	85	0
1	Immune cells	CD4Tconv	CD4Tconv	EEF1A1	0.6	77.3	0
1	Immune cells	CD4Tconv	CD4Tconv	RPL18	0.6	97.6	0
1	Immune cells	CD4Tconv	CD4Tconv	RPL27A	0.59	96	0
1	Immune cells	CD4Tconv	CD4Tconv	RPS9	0.58	94.9	0
1	Immune cells	CD4Tconv	CD4Tconv	RPL23	0.58	92.2	0
1	Immune cells	CD4Tconv	CD4Tconv	MAL	0.56	14.9	0
1	Immune cells	CD4Tconv	CD4Tconv	CD5	0.55	15.8	0
1	Immune cells	CD4Tconv	CD4Tconv	CALM1	0.55	75.9	0
1	Immune cells	CD4Tconv	CD4Tconv	RPS15	0.54	97.6	0
1	Immune cells	CD4Tconv	CD4Tconv	RPL31	0.53	84.3	0
1	Immune cells	CD4Tconv	CD4Tconv	PTMA	0.53	98.2	0
1	Immune cells	CD4Tconv	CD4Tconv	RPL29	0.53	98.8	0
1	Immune cells	CD4Tconv	CD4Tconv	HLA-E	0.52	88.8	0
1	Immune cells	CD4Tconv	CD4Tconv	TXK	0.52	14.3	0
1	Immune cells	CD4Tconv	CD4Tconv	H3F3B	0.52	96.9	0
1	Immune cells	CD4Tconv	CD4Tconv	LAPTM5	0.51	56.4	0
1	Immune cells	CD4Tconv	CD4Tconv	LCP1	0.5	46.4	0
1	Immune cells	CD4Tconv	CD4Tconv	RPS2	0.5	99.6	0
1	Immune cells	CD4Tconv	CD4Tconv	SCML4	0.5	15.5	0
1	Immune cells	CD4Tconv	CD4Tconv	BTF3	0.5	78	0
1	Immune cells	CD4Tconv	CD4Tconv	ZNF831	0.48	13.2	0
1	Immune cells	CD4Tconv	CD4Tconv	RPS11	0.47	98	0
1	Immune cells	CD4Tconv	CD4Tconv	RPL7A	0.46	98.2	0
1	Immune cells	CD4Tconv	CD4Tconv	RPL12	0.46	99.3	0
1	Immune cells	CD4Tconv	CD4Tconv	RPS18	0.46	99.7	0
1	Immune cells	CD4Tconv	CD4Tconv	PRKCQ	0.44	13	0
1	Immune cells	CD4Tconv	CD4Tconv	RPL35	0.44	98.6	0
1	Immune cells	CD4Tconv	CD4Tconv	TESPA1	0.44	12.1	0
1	Immune cells	CD4Tconv	CD4Tconv	RPL36	0.43	98.6	0
1	Immune cells	CD4Tconv	CD4Tconv	RPL37A	0.4	97.4	0
1	Immune cells	CD4Tconv	CD4Tconv	RPS24	0.39	98.9	0
1	Immune cells	CD4Tconv	CD4Tconv	RPL8	0.3	98.2	0
1	Immune cells	CD4Tconv	CD4Tconv	PHPT1	-0.33	16.6	0
1	Immune cells	CD4Tconv	CD4Tconv	PDXK	-0.38	6.4	0
1	Immune cells	CD4Tconv	CD4Tconv	OS9	-0.39	8.2	0
1	Immune cells	CD4Tconv	CD4Tconv	RPN1	-0.4	7.3	0
1	Immune cells	CD4Tconv	CD4Tconv	NDUFS6	-0.45	24	0
1	Immune cells	CD4Tconv	CD4Tconv	ETFB	-0.46	15.7	0
1	Immune cells	CD4Tconv	CD4Tconv	SELENOS	-0.46	7.6	0
1	Immune cells	CD4Tconv	CD4Tconv	MLEC	-0.46	7	0
[truncated: 56,329 more rows]

## Sheet: Table S4
	p_val	avg_log2FC	pct.1	pct.2	p_val_adj	cluster	gene
GUCA2A	0	5.12059	0.623	0.036	0	Epithelial	GUCA2A
FABP1	0	5.09486	0.906	0.201	0	Epithelial	FABP1
PHGR1	0	4.66329	0.995	0.364	0	Epithelial	PHGR1
SLC26A3	0	4.63175	0.668	0.045	0	Epithelial	SLC26A3
GUCA2B	0	4.57602	0.47	0.014	0	Epithelial	GUCA2B
CLCA4	0	4.5376	0.391	0.018	0	Epithelial	CLCA4
AQP8	0	4.38721	0.419	0.016	0	Epithelial	AQP8
CA1	0	4.15377	0.593	0.035	0	Epithelial	CA1
CEACAM7	0	3.98925	0.62	0.032	0	Epithelial	CEACAM7
FXYD3	0	3.87033	0.938	0.228	0	Epithelial	FXYD3
CKB	0	3.62624	0.835	0.232	0	Epithelial	CKB
CA2	0	3.60989	0.833	0.096	0	Epithelial	CA2
MT1G	0	3.50949	0.661	0.15	0	Epithelial	MT1G
TSPAN1	0	3.43977	0.869	0.171	0	Epithelial	TSPAN1
KRT20	0	3.33353	0.737	0.124	0	Epithelial	KRT20
KRT19	0	3.30519	0.916	0.253	0	Epithelial	KRT19
PIGR	0	3.27556	0.992	0.269	0	Epithelial	PIGR
IFI27	0	3.21819	0.87	0.282	0	Epithelial	IFI27
CDHR5	0	3.12846	0.852	0.124	0	Epithelial	CDHR5
MUC12	0	3.05681	0.784	0.14	0	Epithelial	MUC12
PLAC8	0	3.0032	0.711	0.17	0	Epithelial	PLAC8
TMEM54	0	2.93341	0.877	0.197	0	Epithelial	TMEM54
SELENBP1	0	2.91557	0.701	0.135	0	Epithelial	SELENBP1
SELENOP	0	2.86478	0.589	0.16	0	Epithelial	SELENOP
MS4A12	0	2.78478	0.52	0.015	0	Epithelial	MS4A12
LGALS3	0	2.76929	0.972	0.516	0	Epithelial	LGALS3
KRT8	0	2.74088	0.972	0.294	0	Epithelial	KRT8
PRSS3	0	2.72511	0.768	0.11	0	Epithelial	PRSS3
CD177	0	2.6854	0.398	0.025	0	Epithelial	CD177
GPA33	0	2.68193	0.796	0.12	0	Epithelial	GPA33
LGALS4	0	2.67636	0.976	0.28	0	Epithelial	LGALS4
MT1E	0	2.66162	0.728	0.19	0	Epithelial	MT1E
SDCBP2	0	2.5942	0.65	0.072	0	Epithelial	SDCBP2
MISP	0	2.57723	0.745	0.14	0	Epithelial	MISP
CEACAM1	0	2.56186	0.521	0.058	0	Epithelial	CEACAM1
ANPEP	0	2.56074	0.435	0.043	0	Epithelial	ANPEP
CA4	0	2.51786	0.417	0.006	0	Epithelial	CA4
CLDN3	0	2.51523	0.924	0.247	0	Epithelial	CLDN3
PCK1	0	2.51185	0.709	0.111	0	Epithelial	PCK1
MT1H	0	2.50168	0.373	0.036	0	Epithelial	MT1H
SMIM22	0	2.44642	0.861	0.203	0	Epithelial	SMIM22
TSPAN8	0	2.41924	0.904	0.224	0	Epithelial	TSPAN8
CLDN4	0	2.40223	0.94	0.262	0	Epithelial	CLDN4
ZG16	0	2.37023	0.448	0.142	0	Epithelial	ZG16
C10orf99	0	2.37012	0.742	0.107	0	Epithelial	C10orf99
MT1M	0	2.34064	0.483	0.061	0	Epithelial	MT1M
SLC9A3	0	2.33747	0.367	0.051	0	Epithelial	SLC9A3
ITM2C	0	2.32708	0.936	0.493	0	Epithelial	ITM2C
CES2	0	2.29213	0.771	0.159	0	Epithelial	CES2
S100A6	0	2.24193	0.994	0.791	0	Epithelial	S100A6
TST	0	2.23811	0.755	0.182	0	Epithelial	TST
AOC1	0	2.23392	0.74	0.134	0	Epithelial	AOC1
EPCAM	0	2.23362	0.9	0.227	0	Epithelial	EPCAM
PKIB	0	2.21865	0.585	0.051	0	Epithelial	PKIB
MUC13	0	2.19833	0.742	0.178	0	Epithelial	MUC13
SRI	0	2.18846	0.835	0.419	0	Epithelial	SRI
MT2A	0	2.17626	0.717	0.373	0	Epithelial	MT2A
SFN	0	2.11838	0.639	0.133	0	Epithelial	SFN
UGT2B17	0	2.1058	0.428	0.053	0	Epithelial	UGT2B17
SERINC2	0	2.0375	0.699	0.142	0	Epithelial	SERINC2
PLA2G2A	0	2.03566	0.397	0.099	0	Epithelial	PLA2G2A
CAMK2N1	0	2.03548	0.838	0.227	0	Epithelial	CAMK2N1
S100A10	0	2.03453	0.961	0.638	0	Epithelial	S100A10
DSC2	0	2.00503	0.701	0.147	0	Epithelial	DSC2
AMN	0	1.99693	0.707	0.122	0	Epithelial	AMN
ETHE1	0	1.98132	0.687	0.235	0	Epithelial	ETHE1
TFF1	0	1.97607	0.307	0.088	0	Epithelial	TFF1
PLS1	0	1.96256	0.652	0.129	0	Epithelial	PLS1
PRSS8	0	1.95718	0.689	0.135	0	Epithelial	PRSS8
TMPRSS2	0	1.93982	0.607	0.11	0	Epithelial	TMPRSS2
CDKN2B-AS1	0	1.92092	0.423	0.011	0	Epithelial	CDKN2B-AS1
RHOC	0	1.90472	0.704	0.257	0	Epithelial	RHOC
FAM3D	0	1.89252	0.857	0.193	0	Epithelial	FAM3D
CA12	0	1.88603	0.684	0.114	0	Epithelial	CA12
BSG	0	1.8804	0.83	0.457	0	Epithelial	BSG
ELF3	0	1.88022	0.944	0.27	0	Epithelial	ELF3
SLC44A4	0	1.87864	0.773	0.175	0	Epithelial	SLC44A4
GOLM1	0	1.8625	0.666	0.142	0	Epithelial	GOLM1
SLC26A2	0	1.83919	0.423	0.023	0	Epithelial	SLC26A2
ST14	0	1.82672	0.765	0.209	0	Epithelial	ST14
DST	0	1.82307	0.627	0.198	0	Epithelial	DST
FLNB	0	1.82248	0.658	0.16	0	Epithelial	FLNB
C2orf88	0	1.81533	0.496	0.083	0	Epithelial	C2orf88
MYH14	0	1.80623	0.652	0.138	0	Epithelial	MYH14
MT1X	0	1.79934	0.504	0.231	0	Epithelial	MT1X
DHRS11	0	1.79107	0.571	0.078	0	Epithelial	DHRS11
TCF7L2	0	1.79099	0.67	0.172	0	Epithelial	TCF7L2
HMGCS2	0	1.78389	0.522	0.093	0	Epithelial	HMGCS2
SLC4A4	0	1.78229	0.583	0.067	0	Epithelial	SLC4A4
MGLL	0	1.774	0.66	0.194	0	Epithelial	MGLL
CDH17	0	1.77374	0.736	0.173	0	Epithelial	CDH17
TMIGD1	0	1.76963	0.34	0.003	0	Epithelial	TMIGD1
ID1	0	1.76692	0.703	0.265	0	Epithelial	ID1
MEP1A	0	1.7629	0.467	0.036	0	Epithelial	MEP1A
HIST1H1C	0	1.75182	0.564	0.266	0	Epithelial	HIST1H1C
ISG15	0	1.73629	0.476	0.366	0	Epithelial	ISG15
SLC17A4	0	1.72751	0.439	0.016	0	Epithelial	SLC17A4
SPINT1	0	1.72737	0.684	0.171	0	Epithelial	SPINT1
CGN	0	1.72726	0.553	0.092	0	Epithelial	CGN
MIR194-2HG	0	1.71214	0.508	0.086	0	Epithelial	MIR194-2HG
TSPAN3	0	1.70877	0.723	0.306	0	Epithelial	TSPAN3
TRIM31	0	1.70435	0.372	0.053	0	Epithelial	TRIM31
CD24	0	1.70425	0.626	0.206	0	Epithelial	CD24
MDK	0	1.6997	0.417	0.142	0	Epithelial	MDK
HES1	0	1.69369	0.736	0.249	0	Epithelial	HES1
S100A14	0	1.68794	0.732	0.189	0	Epithelial	S100A14
SLC51B	0	1.6855	0.386	0.012	0	Epithelial	SLC51B
MVP	0	1.6827	0.73	0.257	0	Epithelial	MVP
GSN	0	1.68206	0.589	0.264	0	Epithelial	GSN
LIMA1	0	1.6804	0.744	0.25	0	Epithelial	LIMA1
ATP1B1	0	1.66888	0.802	0.297	0	Epithelial	ATP1B1
LGALS3BP	0	1.66121	0.79	0.26	0	Epithelial	LGALS3BP
CDC42EP5	0	1.65352	0.809	0.222	0	Epithelial	CDC42EP5
MTRNR2L12	0	1.64358	0.662	0.213	0	Epithelial	MTRNR2L12
FCGRT	0	1.64346	0.718	0.32	0	Epithelial	FCGRT
CFDP1	0	1.63308	0.55	0.194	0	Epithelial	CFDP1
PPDPF	0	1.62821	0.929	0.69	0	Epithelial	PPDPF
ARL14	0	1.62546	0.445	0.085	0	Epithelial	ARL14
VSIG2	0	1.61358	0.583	0.089	0	Epithelial	VSIG2
CDHR2	0	1.60933	0.398	0.036	0	Epithelial	CDHR2
GIPC1	0	1.59866	0.609	0.173	0	Epithelial	GIPC1
SPATS2L	0	1.57734	0.58	0.212	0	Epithelial	SPATS2L
SULT1B1	0	1.57715	0.49	0.055	0	Epithelial	SULT1B1
HPGD	0	1.57601	0.485	0.085	0	Epithelial	HPGD
CLTB	0	1.56982	0.708	0.322	0	Epithelial	CLTB
CHP2	0	1.56505	0.461	0.029	0	Epithelial	CHP2
COX5B	0	1.56463	0.892	0.647	0	Epithelial	COX5B
HSD11B2	0	1.56177	0.591	0.12	0	Epithelial	HSD11B2
TDP2	0	1.55963	0.579	0.162	0	Epithelial	TDP2
GPRC5A	0	1.55766	0.575	0.135	0	Epithelial	GPRC5A
CEACAM6	0	1.55747	0.476	0.115	0	Epithelial	CEACAM6
TP53I3	0	1.55453	0.546	0.119	0	Epithelial	TP53I3
KRT18	0	1.54754	0.957	0.34	0	Epithelial	KRT18
PLCE1	0	1.54536	0.51	0.085	0	Epithelial	PLCE1
PDE9A	0	1.53895	0.385	0.036	0	Epithelial	PDE9A
LGALS2	0	1.53788	0.431	0.057	0	Epithelial	LGALS2
CDH1	0	1.52578	0.641	0.158	0	Epithelial	CDH1
BLOC1S1	0	1.52526	0.717	0.352	0	Epithelial	BLOC1S1
LMO7	0	1.52256	0.58	0.152	0	Epithelial	LMO7
PPP1R14D	0	1.51977	0.48	0.061	0	Epithelial	PPP1R14D
GGT6	0	1.51809	0.54	0.087	0	Epithelial	GGT6
MPST	0	1.5118	0.686	0.276	0	Epithelial	MPST
CYP3A5	0	1.50548	0.495	0.083	0	Epithelial	CYP3A5
PRDX6	0	1.50349	0.662	0.418	0	Epithelial	PRDX6
EMP1	0	1.49983	0.353	0.084	0	Epithelial	EMP1
ACADS	0	1.49232	0.542	0.115	0	Epithelial	ACADS
ENTPD8	0	1.49136	0.424	0.075	0	Epithelial	ENTPD8
MAOA	0	1.48856	0.506	0.082	0	Epithelial	MAOA
CCDC68	0	1.4859	0.484	0.068	0	Epithelial	CCDC68
B3GALT5	0	1.48339	0.412	0.037	0	Epithelial	B3GALT5
PDLIM1	0	1.47036	0.707	0.273	0	Epithelial	PDLIM1
CDX1	0	1.46541	0.605	0.145	0	Epithelial	CDX1
LSR	0	1.45894	0.619	0.194	0	Epithelial	LSR
TMEM45B	0	1.45716	0.509	0.079	0	Epithelial	TMEM45B
AC023157.3	0	1.45699	0.437	0.116	0	Epithelial	AC023157.3
TJP3	0	1.43975	0.491	0.071	0	Epithelial	TJP3
TRPM6	0	1.42828	0.335	0.008	0	Epithelial	TRPM6
HSD17B2	0	1.42628	0.373	0.021	0	Epithelial	HSD17B2
RETSAT	0	1.42513	0.487	0.099	0	Epithelial	RETSAT
DSG2	0	1.42405	0.631	0.168	0	Epithelial	DSG2
TMC5	0	1.42218	0.558	0.126	0	Epithelial	TMC5
UQCRQ	0	1.41769	0.772	0.508	0	Epithelial	UQCRQ
LIPH	0	1.41761	0.502	0.099	0	Epithelial	LIPH
CHCHD10	0	1.407	0.753	0.509	0	Epithelial	CHCHD10
SMPDL3A	0	1.40093	0.387	0.065	0	Epithelial	SMPDL3A
DHRS9	0	1.39649	0.343	0.03	0	Epithelial	DHRS9
TMEM37	0	1.39553	0.351	0.029	0	Epithelial	TMEM37
NEAT1	0	1.39441	0.995	0.953	0	Epithelial	NEAT1
CDA	0	1.38968	0.305	0.035	0	Epithelial	CDA
LINC02023	0	1.38691	0.345	0.016	0	Epithelial	LINC02023
CDKN2B	0	1.38687	0.421	0.048	0	Epithelial	CDKN2B
ATP8B1	0	1.38577	0.605	0.164	0	Epithelial	ATP8B1
RBM47	0	1.38183	0.615	0.225	0	Epithelial	RBM47
EPS8L3	0	1.38142	0.567	0.122	0	Epithelial	EPS8L3
SLC6A8	0	1.38069	0.435	0.096	0	Epithelial	SLC6A8
ASS1	0	1.37631	0.468	0.127	0	Epithelial	ASS1
HNF4A	0	1.37597	0.535	0.112	0	Epithelial	HNF4A
SGK1	0	1.37168	0.503	0.201	0	Epithelial	SGK1
KLF5	0	1.37009	0.696	0.211	0	Epithelial	KLF5
CHMP2A	0	1.36332	0.707	0.408	0	Epithelial	CHMP2A
BICDL2	0	1.36213	0.517	0.096	0	Epithelial	BICDL2
MAPK3	0	1.36082	0.573	0.17	0	Epithelial	MAPK3
ACAA2	0	1.36027	0.544	0.2	0	Epithelial	ACAA2
ADIRF	0	1.35158	0.516	0.133	0	Epithelial	ADIRF
TNFSF10	0	1.34825	0.567	0.227	0	Epithelial	TNFSF10
CTNND1	0	1.34255	0.632	0.21	0	Epithelial	CTNND1
PAPSS2	0	1.3414	0.486	0.102	0	Epithelial	PAPSS2
PTPRF	0	1.33837	0.609	0.164	0	Epithelial	PTPRF
SLC22A18	0	1.33826	0.503	0.117	0	Epithelial	SLC22A18
CTSA	0	1.33792	0.6	0.268	0	Epithelial	CTSA
EPS8L2	0	1.33613	0.552	0.155	0	Epithelial	EPS8L2
UQCRC1	0	1.33438	0.688	0.326	0	Epithelial	UQCRC1
CHP1	0	1.32973	0.558	0.228	0	Epithelial	CHP1
SULT1A1	0	1.32842	0.446	0.075	0	Epithelial	SULT1A1
MXI1	0	1.32692	0.469	0.148	0	Epithelial	MXI1
PADI2	0	1.32584	0.474	0.068	0	Epithelial	PADI2
HRCT1	0	1.32556	0.372	0.035	0	Epithelial	HRCT1
DGAT1	0	1.32497	0.605	0.213	0	Epithelial	DGAT1
MGAT4B	0	1.32236	0.601	0.2	0	Epithelial	MGAT4B
PLA2G10	0	1.32227	0.437	0.06	0	Epithelial	PLA2G10
TPRN	0	1.32058	0.459	0.095	0	Epithelial	TPRN
AKR1C3	0	1.29523	0.42	0.083	0	Epithelial	AKR1C3
MYL12B	0	1.28872	0.867	0.668	0	Epithelial	MYL12B
AHCYL2	0	1.28772	0.413	0.066	0	Epithelial	AHCYL2
NXPE4	0	1.28651	0.415	0.081	0	Epithelial	NXPE4
LLGL2	0	1.28371	0.613	0.185	0	Epithelial	LLGL2
GNA11	0	1.28326	0.45	0.081	0	Epithelial	GNA11
CLDN23	0	1.2824	0.293	0.031	0	Epithelial	CLDN23
C4orf48	0	1.28019	0.655	0.337	0	Epithelial	C4orf48
VILL	0	1.27013	0.449	0.083	0	Epithelial	VILL
DSP	0	1.26941	0.709	0.209	0	Epithelial	DSP
TFCP2L1	0	1.26937	0.471	0.101	0	Epithelial	TFCP2L1
LAMB3	0	1.26901	0.47	0.11	0	Epithelial	LAMB3
TMEM238	0	1.26167	0.708	0.337	0	Epithelial	TMEM238
EFHD2	0	1.25677	0.714	0.373	0	Epithelial	EFHD2
TLCD2	0	1.255	0.462	0.096	0	Epithelial	TLCD2
PKP3	0	1.25413	0.538	0.132	0	Epithelial	PKP3
EPS8	0	1.2514	0.509	0.144	0	Epithelial	EPS8
SCNN1B	0	1.25012	0.332	0.034	0	Epithelial	SCNN1B
APOBR	0	1.24964	0.487	0.102	0	Epithelial	APOBR
PLCD3	0	1.24637	0.412	0.055	0	Epithelial	PLCD3
NR2F6	0	1.24459	0.522	0.155	0	Epithelial	NR2F6
HK2	0	1.24106	0.42	0.091	0	Epithelial	HK2
SSFA2	0	1.23969	0.534	0.188	0	Epithelial	SSFA2
STAP2	0	1.2387	0.478	0.09	0	Epithelial	STAP2
MIER3	0	1.23636	0.377	0.076	0	Epithelial	MIER3
PRR13	0	1.23513	0.631	0.308	0	Epithelial	PRR13
HHLA2	0	1.23324	0.346	0.02	0	Epithelial	HHLA2
USP53	0	1.23304	0.538	0.18	0	Epithelial	USP53
C15orf48	0	1.23134	0.422	0.069	0	Epithelial	C15orf48
NXPE1	0	1.23021	0.417	0.083	0	Epithelial	NXPE1
FBLIM1	0	1.2266	0.453	0.092	0	Epithelial	FBLIM1
JUP	0	1.2258	0.562	0.165	0	Epithelial	JUP
AC254629.1	0	1.22566	0.405	0.047	0	Epithelial	AC254629.1
COL17A1	0	1.22433	0.375	0.042	0	Epithelial	COL17A1
MARCKS	0	1.22216	0.815	0.428	0	Epithelial	MARCKS
VAMP8	0	1.22209	0.732	0.462	0	Epithelial	VAMP8
PDCD6IP	0	1.21489	0.589	0.257	0	Epithelial	PDCD6IP
KLF3	0	1.21389	0.62	0.242	0	Epithelial	KLF3
MT1F	0	1.21054	0.342	0.094	0	Epithelial	MT1F
SLC20A1	0	1.20913	0.452	0.189	0	Epithelial	SLC20A1
MAL2	0	1.20811	0.505	0.13	0	Epithelial	MAL2
KLF4	0	1.20711	0.769	0.288	0	Epithelial	KLF4
C1orf21	0	1.20625	0.496	0.134	0	Epithelial	C1orf21
LRRC19	0	1.2047	0.383	0.034	0	Epithelial	LRRC19
ZBTB7B	0	1.20125	0.448	0.101	0	Epithelial	ZBTB7B
ABCC3	0	1.20097	0.478	0.116	0	Epithelial	ABCC3
PRR15	0	1.19875	0.411	0.07	0	Epithelial	PRR15
H2AFJ	0	1.19812	0.635	0.269	0	Epithelial	H2AFJ
CD2AP	0	1.19792	0.612	0.246	0	Epithelial	CD2AP
ATP5F1D	0	1.19107	0.784	0.618	0	Epithelial	ATP5F1D
RND3	0	1.19058	0.51	0.152	0	Epithelial	RND3
PARM1	0	1.18925	0.448	0.132	0	Epithelial	PARM1
APPL2	0	1.1886	0.405	0.108	0	Epithelial	APPL2
TXN	0	1.18459	0.823	0.612	0	Epithelial	TXN
SHROOM1	0	1.17976	0.391	0.068	0	Epithelial	SHROOM1
NBL1	0	1.17961	0.598	0.188	0	Epithelial	NBL1
GNG12	0	1.1779	0.466	0.121	0	Epithelial	GNG12
PDZD3	0	1.1772	0.328	0.019	0	Epithelial	PDZD3
ETNK1	0	1.17686	0.45	0.267	0	Epithelial	ETNK1
C19orf33	0	1.17488	0.383	0.048	0	Epithelial	C19orf33
AGR3	0	1.17006	0.514	0.126	0	Epithelial	AGR3
SCIN	0	1.16381	0.352	0.046	0	Epithelial	SCIN
SCNN1A	0	1.16141	0.461	0.13	0	Epithelial	SCNN1A
NET1	0	1.16009	0.559	0.191	0	Epithelial	NET1
EFNA1	0	1.15742	0.425	0.122	0	Epithelial	EFNA1
COMTD1	0	1.15406	0.533	0.214	0	Epithelial	COMTD1
HDHD3	0	1.15203	0.475	0.123	0	Epithelial	HDHD3
TMEM236	0	1.1516	0.375	0.042	0	Epithelial	TMEM236
HSD17B11	0	1.15088	0.562	0.245	0	Epithelial	HSD17B11
CAPN5	0	1.14544	0.454	0.092	0	Epithelial	CAPN5
HEXIM1	0	1.14514	0.692	0.465	0	Epithelial	HEXIM1
TMPRSS4	0	1.1441	0.505	0.131	0	Epithelial	TMPRSS4
RRBP1	0	1.14353	0.81	0.506	0	Epithelial	RRBP1
UGP2	0	1.14289	0.583	0.289	0	Epithelial	UGP2
CDX2	0	1.14192	0.547	0.152	0	Epithelial	CDX2
GPT	0	1.13954	0.348	0.035	0	Epithelial	GPT
CHMP4B	0	1.13803	0.595	0.285	0	Epithelial	CHMP4B
FBXW5	0	1.13486	0.628	0.307	0	Epithelial	FBXW5
FRMD1	0	1.13397	0.299	0.036	0	Epithelial	FRMD1
SULT1A2	0	1.13357	0.294	0.008	0	Epithelial	SULT1A2
MALAT1	0	1.13104	1	0.999	0	Epithelial	MALAT1
MXD1	0	1.12789	0.401	0.136	0	Epithelial	MXD1
RASSF7	0	1.12532	0.536	0.162	0	Epithelial	RASSF7
AKR1B10	0	1.12456	0.324	0.019	0	Epithelial	AKR1B10
INF2	0	1.12166	0.479	0.147	0	Epithelial	INF2
FAM162A	0	1.1201	0.586	0.319	0	Epithelial	FAM162A
FUT3	0	1.11913	0.443	0.105	0	Epithelial	FUT3
CD9	0	1.11834	0.767	0.353	0	Epithelial	CD9
CES3	0	1.11742	0.385	0.055	0	Epithelial	CES3
WASL	0	1.11475	0.534	0.186	0	Epithelial	WASL
NDUFB7	0	1.11444	0.773	0.565	0	Epithelial	NDUFB7
TMC4	0	1.11343	0.46	0.1	0	Epithelial	TMC4
MYO1D	0	1.11021	0.514	0.176	0	Epithelial	MYO1D
USH1C	0	1.10874	0.487	0.119	0	Epithelial	USH1C
C1QTNF12	0	1.10263	0.298	0.02	0	Epithelial	C1QTNF12
MYO7B	0	1.10254	0.438	0.098	0	Epithelial	MYO7B
TP53INP2	0	1.10223	0.342	0.089	0	Epithelial	TP53INP2
MUC3A	0	1.09979	0.418	0.092	0	Epithelial	MUC3A
POF1B	0	1.09799	0.487	0.127	0	Epithelial	POF1B
PTTG1IP	0	1.09716	0.558	0.258	0	Epithelial	PTTG1IP
NDUFA1	0	1.09442	0.805	0.642	0	Epithelial	NDUFA1
BTNL3	0	1.0905	0.323	0.018	0	Epithelial	BTNL3
MUC4	0	1.08784	0.441	0.125	0	Epithelial	MUC4
COX6B1	0	1.08641	0.835	0.674	0	Epithelial	COX6B1
SEMA6A	0	1.08405	0.369	0.05	0	Epithelial	SEMA6A
KIAA1522	0	1.08354	0.437	0.095	0	Epithelial	KIAA1522
ATP5ME	0	1.08262	0.824	0.661	0	Epithelial	ATP5ME
VIPR1	0	1.08194	0.367	0.057	0	Epithelial	VIPR1
FZD5	0	1.07996	0.468	0.128	0	Epithelial	FZD5
GRN	0	1.07502	0.729	0.357	0	Epithelial	GRN
HEPH	0	1.07363	0.454	0.115	0	Epithelial	HEPH
ACTN4	0	1.07222	0.676	0.325	0	Epithelial	ACTN4
VIL1	0	1.07143	0.521	0.148	0	Epithelial	VIL1
ELOB	0	1.07101	0.846	0.669	0	Epithelial	ELOB
COX7B	0	1.06681	0.785	0.602	0	Epithelial	COX7B
ACVRL1	0	1.06604	0.363	0.062	0	Epithelial	ACVRL1
FUCA1	0	1.06592	0.468	0.132	0	Epithelial	FUCA1
UGDH	0	1.06559	0.443	0.143	0	Epithelial	UGDH
ANKRD9	0	1.06351	0.425	0.108	0	Epithelial	ANKRD9
MYL6	0	1.06288	0.894	0.813	0	Epithelial	MYL6
TRPM4	0	1.06285	0.46	0.12	0	Epithelial	TRPM4
HIST1H2BG	0	1.06175	0.417	0.204	0	Epithelial	HIST1H2BG
RIOK3	0	1.0578	0.414	0.129	0	Epithelial	RIOK3
SHROOM3	0	1.05672	0.427	0.099	0	Epithelial	SHROOM3
PRR15L	0	1.05169	0.412	0.091	0	Epithelial	PRR15L
RFK	0	1.04993	0.371	0.137	0	Epithelial	RFK
NT5C	0	1.04867	0.613	0.276	0	Epithelial	NT5C
PDGFA	0	1.04496	0.397	0.088	0	Epithelial	PDGFA
ATP5MC3	0	1.0385	0.744	0.594	0	Epithelial	ATP5MC3
CTNNA1	0	1.03778	0.567	0.255	0	Epithelial	CTNNA1
LINC01133	0	1.03734	0.313	0.029	0	Epithelial	LINC01133
CISD3	0	1.037	0.533	0.22	0	Epithelial	CISD3
ACADVL	0	1.03529	0.673	0.405	0	Epithelial	ACADVL
TMBIM1	0	1.03101	0.427	0.153	0	Epithelial	TMBIM1
ABCA5	0	1.03038	0.417	0.14	0	Epithelial	ABCA5
UGT2A3	0	1.02929	0.307	0.03	0	Epithelial	UGT2A3
TMEM176A	0	1.02895	0.557	0.185	0	Epithelial	TMEM176A
EDN3	0	1.02823	0.309	0.015	0	Epithelial	EDN3
PFKL	0	1.02579	0.589	0.276	0	Epithelial	PFKL
PYGB	0	1.02506	0.483	0.167	0	Epithelial	PYGB
FABP2	0	1.02255	0.389	0.07	0	Epithelial	FABP2
PLXNB2	0	1.02209	0.472	0.174	0	Epithelial	PLXNB2
HIST1H2AC	0	1.01981	0.466	0.211	0	Epithelial	HIST1H2AC
CASP7	0	1.01729	0.425	0.14	0	Epithelial	CASP7
SYTL2	0	1.01324	0.506	0.167	0	Epithelial	SYTL2
MAST2	0	1.00928	0.344	0.065	0	Epithelial	MAST2
JPT1	0	1.00792	0.654	0.378	0	Epithelial	JPT1
SCP2	0	0.99994	0.657	0.376	0	Epithelial	SCP2
ABHD17C	0	0.996576	0.398	0.108	0	Epithelial	ABHD17C
SEMA3B	0	0.989505	0.363	0.082	0	Epithelial	SEMA3B
AC103702.2	0	0.98771	0.514	0.167	0	Epithelial	AC103702.2
NAAA	0	0.986023	0.361	0.109	0	Epithelial	NAAA
XDH	0	0.98506	0.251	0.017	0	Epithelial	XDH
NBEAL1	0	0.984976	0.372	0.091	0	Epithelial	NBEAL1
PTK6	0	0.984844	0.393	0.09	0	Epithelial	PTK6
SLC39A5	0	0.983876	0.349	0.062	0	Epithelial	SLC39A5
CCL28	0	0.980665	0.334	0.045	0	Epithelial	CCL28
B3GNT7	0	0.979016	0.277	0.058	0	Epithelial	B3GNT7
PLEC	0	0.97896	0.508	0.225	0	Epithelial	PLEC
H1F0	0	0.978066	0.488	0.174	0	Epithelial	H1F0
ANXA4	0	0.977021	0.545	0.219	0	Epithelial	ANXA4
SAMD9	0	0.97587	0.358	0.201	0	Epithelial	SAMD9
CLSTN1	0	0.973572	0.511	0.222	0	Epithelial	CLSTN1
VDR	0	0.973212	0.382	0.105	0	Epithelial	VDR
ACSS2	0	0.972311	0.437	0.128	0	Epithelial	ACSS2
SPTBN1	0	0.970869	0.684	0.316	0	Epithelial	SPTBN1
DDX60	0	0.969348	0.304	0.088	0	Epithelial	DDX60
SH3BGRL2	0	0.96881	0.418	0.109	0	Epithelial	SH3BGRL2
NAPRT	0	0.967148	0.409	0.124	0	Epithelial	NAPRT
SLC25A5	0	0.965141	0.755	0.583	0	Epithelial	SLC25A5
COX5A	0	0.963137	0.694	0.507	0	Epithelial	COX5A
DDAH2	0	0.962168	0.443	0.205	0	Epithelial	DDAH2
PKN2	0	0.962078	0.596	0.299	0	Epithelial	PKN2
COX6C	0	0.960916	0.85	0.737	0	Epithelial	COX6C
CDC42BPA	0	0.959435	0.401	0.123	0	Epithelial	CDC42BPA
MRPL41	0	0.957548	0.621	0.391	0	Epithelial	MRPL41
NR3C2	0	0.957398	0.367	0.07	0	Epithelial	NR3C2
PLEKHG6	0	0.954571	0.318	0.044	0	Epithelial	PLEKHG6
CLRN3	0	0.9527	0.376	0.084	0	Epithelial	CLRN3
SIRT6	0	0.952616	0.329	0.072	0	Epithelial	SIRT6
LGR4	0	0.952031	0.368	0.079	0	Epithelial	LGR4
CIB1	0	0.951398	0.749	0.527	0	Epithelial	CIB1
KIF13B	0	0.950951	0.471	0.195	0	Epithelial	KIF13B
AURKAIP1	0	0.950689	0.717	0.503	0	Epithelial	AURKAIP1
B4GALNT3	0	0.95017	0.318	0.044	0	Epithelial	B4GALNT3
GSDMD	0	0.949975	0.543	0.272	0	Epithelial	GSDMD
ZZEF1	0	0.948274	0.405	0.127	0	Epithelial	ZZEF1
MOGAT3	0	0.947619	0.317	0.049	0	Epithelial	MOGAT3
FRYL	0	0.947498	0.659	0.298	0	Epithelial	FRYL
A1CF	0	0.945483	0.348	0.064	0	Epithelial	A1CF
SQOR	0	0.94468	0.472	0.208	0	Epithelial	SQOR
MAGI3	0	0.942875	0.374	0.096	0	Epithelial	MAGI3
ATP5MD	0	0.942094	0.75	0.624	0	Epithelial	ATP5MD
TPM1	0	0.941789	0.688	0.271	0	Epithelial	TPM1
ZBTB7A	0	0.940652	0.663	0.369	0	Epithelial	ZBTB7A
S100A16	0	0.937618	0.497	0.171	0	Epithelial	S100A16
PPARG	0	0.935598	0.343	0.067	0	Epithelial	PPARG
IGSF9	0	0.935014	0.265	0.024	0	Epithelial	IGSF9
SOX4	0	0.934342	0.591	0.312	0	Epithelial	SOX4
ANXA11	0	0.934271	0.67	0.379	0	Epithelial	ANXA11
TSC22D1	0	0.932334	0.59	0.254	0	Epithelial	TSC22D1
TNFRSF1A	0	0.93143	0.414	0.148	0	Epithelial	TNFRSF1A
ALDH2	0	0.929654	0.553	0.254	0	Epithelial	ALDH2
TMEM176B	0	0.928911	0.598	0.204	0	Epithelial	TMEM176B
DYRK2	0	0.928734	0.444	0.172	0	Epithelial	DYRK2
COX7A2	0	0.920718	0.826	0.723	0	Epithelial	COX7A2
STX19	0	0.92055	0.308	0.049	0	Epithelial	STX19
ATP5PF	0	0.920151	0.736	0.573	0	Epithelial	ATP5PF
CAST	0	0.919348	0.7	0.431	0	Epithelial	CAST
PTPRH	0	0.918704	0.268	0.02	0	Epithelial	PTPRH
APLP2	0	0.918133	0.626	0.307	0	Epithelial	APLP2
RAPGEFL1	0	0.91479	0.34	0.069	0	Epithelial	RAPGEFL1
TM4SF5	0	0.914007	0.27	0.059	0	Epithelial	TM4SF5
C1orf115	0	0.912145	0.276	0.032	0	Epithelial	C1orf115
LRRC1	0	0.911363	0.299	0.056	0	Epithelial	LRRC1
ETFB	0	0.911117	0.638	0.399	0	Epithelial	ETFB
TXNDC17	0	0.910576	0.568	0.33	0	Epithelial	TXNDC17
CTTNBP2NL	0	0.909968	0.349	0.093	0	Epithelial	CTTNBP2NL
CTTN	0	0.909882	0.438	0.147	0	Epithelial	CTTN
EFNB2	0	0.909494	0.459	0.161	0	Epithelial	EFNB2
LAMA3	0	0.906181	0.257	0.047	0	Epithelial	LAMA3
PNPLA2	0	0.90598	0.458	0.232	0	Epithelial	PNPLA2
ROMO1	0	0.904815	0.591	0.365	0	Epithelial	ROMO1
ACSL5	0	0.903375	0.454	0.168	0	Epithelial	ACSL5
FTH1	0	0.903206	0.773	0.677	0	Epithelial	FTH1
HIST1H4C	0	0.902451	0.636	0.462	0	Epithelial	HIST1H4C
ALKBH7	0	0.900954	0.635	0.438	0	Epithelial	ALKBH7
BLVRB	0	0.900623	0.52	0.251	0	Epithelial	BLVRB
IL18	0	0.898148	0.357	0.099	0	Epithelial	IL18
NHSL1	0	0.89754	0.325	0.065	0	Epithelial	NHSL1
CAPN2	0	0.894181	0.516	0.264	0	Epithelial	CAPN2
FAT1	0	0.892497	0.49	0.173	0	Epithelial	FAT1
ATP5F1B	0	0.891886	0.704	0.513	0	Epithelial	ATP5F1B
TCEA3	0	0.891814	0.431	0.138	0	Epithelial	TCEA3
TRANK1	0	0.891675	0.298	0.108	0	Epithelial	TRANK1
LINC00483	0	0.887275	0.296	0.036	0	Epithelial	LINC00483
RAB11FIP1	0	0.884988	0.724	0.41	0	Epithelial	RAB11FIP1
DOK4	0	0.884943	0.313	0.056	0	Epithelial	DOK4
RHOU	0	0.88111	0.274	0.051	0	Epithelial	RHOU
DDR1	0	0.879573	0.421	0.131	0	Epithelial	DDR1
SGK2	0	0.879438	0.267	0.021	0	Epithelial	SGK2
SPPL2A	0	0.878125	0.517	0.264	0	Epithelial	SPPL2A
SLC9A3R1	0	0.874774	0.454	0.252	0	Epithelial	SLC9A3R1
PTP4A1	0	0.872798	0.571	0.336	0	Epithelial	PTP4A1
INAVA	0	0.87147	0.299	0.05	0	Epithelial	INAVA
PPP1R16A	0	0.870599	0.395	0.122	0	Epithelial	PPP1R16A
PCSK5	0	0.870265	0.26	0.021	0	Epithelial	PCSK5
PLPP2	0	0.868481	0.414	0.113	0	Epithelial	PLPP2
TMEM59	0	0.866284	0.773	0.652	0	Epithelial	TMEM59
BAIAP2L1	0	0.866232	0.353	0.104	0	Epithelial	BAIAP2L1
EDF1	0	0.866119	0.833	0.706	0	Epithelial	EDF1
GOLIM4	0	0.86537	0.542	0.268	0	Epithelial	GOLIM4
ATP10B	0	0.864881	0.331	0.081	0	Epithelial	ATP10B
ARHGEF16	0	0.86073	0.344	0.076	0	Epithelial	ARHGEF16
SEPHS2	0	0.856569	0.476	0.227	0	Epithelial	SEPHS2
VEGFA	0	0.856178	0.525	0.257	0	Epithelial	VEGFA
CYC1	0	0.854031	0.541	0.342	0	Epithelial	CYC1
HLA-A	0	0.852812	0.955	0.929	0	Epithelial	HLA-A
UQCR11	0	0.851661	0.68	0.522	0	Epithelial	UQCR11
COBL	0	0.848234	0.318	0.07	0	Epithelial	COBL
UACA	0	0.845856	0.374	0.128	0	Epithelial	UACA
LGALS9	0	0.84363	0.49	0.205	0	Epithelial	LGALS9
MYO1C	0	0.843549	0.465	0.2	0	Epithelial	MYO1C
PINK1	0	0.842162	0.354	0.132	0	Epithelial	PINK1
PLOD2	0	0.841256	0.268	0.064	0	Epithelial	PLOD2
VPS13A	0	0.840257	0.407	0.167	0	Epithelial	VPS13A
SH3RF1	0	0.837082	0.333	0.087	0	Epithelial	SH3RF1
SIAE	0	0.836666	0.323	0.083	0	Epithelial	SIAE
NDUFB3	0	0.836345	0.58	0.387	0	Epithelial	NDUFB3
NANS	0	0.834994	0.534	0.342	0	Epithelial	NANS
CEACAM5	0	0.834881	0.265	0.053	0	Epithelial	CEACAM5
SATB2	0	0.834631	0.358	0.098	0	Epithelial	SATB2
GDPD3	0	0.83091	0.254	0.034	0	Epithelial	GDPD3
MAP2K2	0	0.830316	0.628	0.436	0	Epithelial	MAP2K2
LPP	0	0.828742	0.583	0.283	0	Epithelial	LPP
ATP5IF1	0	0.828492	0.587	0.401	0	Epithelial	ATP5IF1
SLC25A25-AS1	0	0.827274	0.364	0.095	0	Epithelial	SLC25A25-AS1
MIR22HG	0	0.8271	0.353	0.136	0	Epithelial	MIR22HG
GAK	0	0.82501	0.436	0.188	0	Epithelial	GAK
SMIM31	0	0.824127	0.274	0.044	0	Epithelial	SMIM31
GALNT7	0	0.823676	0.451	0.172	0	Epithelial	GALNT7
UQCR10	0	0.821309	0.715	0.574	0	Epithelial	UQCR10
KTN1	0	0.821182	0.587	0.364	0	Epithelial	KTN1
SMIM14	0	0.818821	0.542	0.252	0	Epithelial	SMIM14
CLMN	0	0.817049	0.424	0.179	0	Epithelial	CLMN
TMEM171	0	0.815631	0.274	0.037	0	Epithelial	TMEM171
CNNM4	0	0.813835	0.333	0.093	0	Epithelial	CNNM4
ASL	0	0.813579	0.333	0.1	0	Epithelial	ASL
PBLD	0	0.812655	0.276	0.034	0	Epithelial	PBLD
TMEM8A	0	0.812057	0.386	0.159	0	Epithelial	TMEM8A
TMCC3	0	0.810552	0.264	0.068	0	Epithelial	TMCC3
ARL4A	0	0.810236	0.536	0.285	0	Epithelial	ARL4A
PANK3	0	0.808729	0.425	0.184	0	Epithelial	PANK3
SLC25A1	0	0.80838	0.441	0.193	0	Epithelial	SLC25A1
F2RL1	0	0.808148	0.284	0.057	0	Epithelial	F2RL1
BCAS1	0	0.807134	0.29	0.055	0	Epithelial	BCAS1
RASEF	0	0.803789	0.287	0.087	0	Epithelial	RASEF
BAIAP2L2	0	0.802977	0.315	0.075	0	Epithelial	BAIAP2L2
MTUS1	0	0.801533	0.394	0.151	0	Epithelial	MTUS1
AFDN	0	0.801339	0.506	0.222	0	Epithelial	AFDN
CBLC	0	0.797321	0.299	0.056	0	Epithelial	CBLC
IL17RE	0	0.796832	0.297	0.065	0	Epithelial	IL17RE
COX4I1	0	0.794053	0.707	0.554	0	Epithelial	COX4I1
ACOX1	0	0.793555	0.278	0.065	0	Epithelial	ACOX1
KIAA0232	0	0.793052	0.402	0.179	0	Epithelial	KIAA0232
ABHD3	0	0.792552	0.311	0.116	0	Epithelial	ABHD3
TSPO	0	0.791319	0.708	0.5	0	Epithelial	TSPO
VMP1	0	0.790716	0.759	0.509	0	Epithelial	VMP1
MIDN	0	0.790503	0.663	0.474	0	Epithelial	MIDN
RAB25	0	0.79022	0.409	0.134	0	Epithelial	RAB25
SDC4	0	0.788259	0.434	0.172	0	Epithelial	SDC4
B3GNT3	0	0.786973	0.294	0.06	0	Epithelial	B3GNT3
NDRG1	0	0.786108	0.408	0.195	0	Epithelial	NDRG1
CYB5A	0	0.785911	0.442	0.222	0	Epithelial	CYB5A
PLXNA2	0	0.782002	0.288	0.061	0	Epithelial	PLXNA2
ECI1	0	0.781827	0.507	0.301	0	Epithelial	ECI1
ADAP1	0	0.781693	0.356	0.116	0	Epithelial	ADAP1
GSDMB	0	0.781166	0.305	0.068	0	Epithelial	GSDMB
SLPI	0	0.780074	0.295	0.086	0	Epithelial	SLPI
BMP2	0	0.777577	0.261	0.044	0	Epithelial	BMP2
PCLO	0	0.777458	0.268	0.071	0	Epithelial	PCLO
ARHGAP27	0	0.776976	0.331	0.11	0	Epithelial	ARHGAP27
SLC22A5	0	0.776871	0.255	0.04	0	Epithelial	SLC22A5
RETREG1	0	0.776629	0.311	0.081	0	Epithelial	RETREG1
ATP8A1	0	0.774083	0.322	0.097	0	Epithelial	ATP8A1
TCIM	0	0.773841	0.282	0.137	0	Epithelial	TCIM
P2RX4	0	0.772848	0.318	0.121	0	Epithelial	P2RX4
TMBIM6	0	0.771906	0.847	0.734	0	Epithelial	TMBIM6
SIPA1L3	0	0.771448	0.303	0.083	0	Epithelial	SIPA1L3
PIGZ	0	0.771169	0.274	0.052	0	Epithelial	PIGZ
PRR5L	0	0.770615	0.277	0.056	0	Epithelial	PRR5L
PPARA	0	0.770246	0.354	0.132	0	Epithelial	PPARA
BCL10	0	0.769769	0.41	0.186	0	Epithelial	BCL10
GSKIP	0	0.769501	0.336	0.114	0	Epithelial	GSKIP
ARHGEF11	0	0.768329	0.314	0.095	0	Epithelial	ARHGEF11
ESRRA	0	0.768164	0.387	0.155	0	Epithelial	ESRRA
CEBPG	0	0.766425	0.41	0.185	0	Epithelial	CEBPG
NDUFB1	0	0.766004	0.618	0.443	0	Epithelial	NDUFB1
ECE1	0	0.764668	0.337	0.126	0	Epithelial	ECE1
MMP15	0	0.764368	0.285	0.062	0	Epithelial	MMP15
MTMR11	0	0.76105	0.28	0.057	0	Epithelial	MTMR11
RASSF6	0	0.760863	0.405	0.141	0	Epithelial	RASSF6
LCN2	0	0.760663	0.324	0.145	0	Epithelial	LCN2
LETM1	0	0.759484	0.327	0.113	0	Epithelial	LETM1
KIF16B	0	0.758693	0.344	0.121	0	Epithelial	KIF16B
CSTB	0	0.758162	0.743	0.529	0	Epithelial	CSTB
RABL6	0	0.758156	0.496	0.259	0	Epithelial	RABL6
GALNT12	0	0.757957	0.387	0.12	0	Epithelial	GALNT12
ERBIN	0	0.756271	0.447	0.271	0	Epithelial	ERBIN
ZNF326	0	0.755081	0.429	0.214	0	Epithelial	ZNF326
RILP	0	0.754827	0.284	0.073	0	Epithelial	RILP
IMPA1	0	0.753717	0.334	0.115	0	Epithelial	IMPA1
TTC22	0	0.752718	0.25	0.037	0	Epithelial	TTC22
ZFAND2B	0	0.748069	0.385	0.158	0	Epithelial	ZFAND2B
TTC39B	0	0.747433	0.306	0.095	0	Epithelial	TTC39B
CHMP1A	0	0.746075	0.382	0.161	0	Epithelial	CHMP1A
CRYL1	0	0.74495	0.347	0.138	0	Epithelial	CRYL1
CD63	0	0.744895	0.873	0.698	0	Epithelial	CD63
MAVS	0	0.743446	0.396	0.173	0	Epithelial	MAVS
FBXO32	0	0.742616	0.34	0.156	0	Epithelial	FBXO32
STAT6	0	0.742261	0.387	0.168	0	Epithelial	STAT6
TMEM184A	0	0.742181	0.283	0.063	0	Epithelial	TMEM184A
TMEM63B	0	0.739057	0.289	0.079	0	Epithelial	TMEM63B
PLIN3	0	0.738308	0.34	0.18	0	Epithelial	PLIN3
HOXB7	0	0.735357	0.336	0.112	0	Epithelial	HOXB7
AKAP9	0	0.734601	0.825	0.649	0	Epithelial	AKAP9
C1orf210	0	0.734526	0.263	0.037	0	Epithelial	C1orf210
RAC1	0	0.733219	0.735	0.52	0	Epithelial	RAC1
CEP170B	0	0.732403	0.302	0.084	0	Epithelial	CEP170B
BAD	0	0.731125	0.411	0.206	0	Epithelial	BAD
VPS28	0	0.730596	0.648	0.471	0	Epithelial	VPS28
BCL2L15	0	0.729585	0.27	0.061	0	Epithelial	BCL2L15
MYO1E	0	0.729528	0.323	0.106	0	Epithelial	MYO1E
PKP2	0	0.728577	0.328	0.119	0	Epithelial	PKP2
MTRNR2L8	0	0.728551	0.257	0.059	0	Epithelial	MTRNR2L8
CTSZ	0	0.728487	0.63	0.415	0	Epithelial	CTSZ
RNPEP	0	0.727914	0.374	0.157	0	Epithelial	RNPEP
ECHS1	0	0.726875	0.507	0.324	0	Epithelial	ECHS1
FCGBP	0	0.726332	0.66	0.189	0	Epithelial	FCGBP
KIF1C	0	0.72367	0.351	0.138	0	Epithelial	KIF1C
PDZK1IP1	0	0.72195	0.267	0.085	0	Epithelial	PDZK1IP1
NRARP	0	0.721213	0.404	0.224	0	Epithelial	NRARP
MYO6	0	0.720834	0.439	0.193	0	Epithelial	MYO6
SH3D19	0	0.72071	0.301	0.085	0	Epithelial	SH3D19
ERN2	0	0.71529	0.391	0.138	0	Epithelial	ERN2
GFPT1	0	0.711857	0.508	0.293	0	Epithelial	GFPT1
SLC25A24	0	0.709372	0.371	0.152	0	Epithelial	SLC25A24
GFER	0	0.708008	0.324	0.147	0	Epithelial	GFER
F11R	0	0.70608	0.34	0.141	0	Epithelial	F11R
KCNK1	0	0.705637	0.276	0.081	0	Epithelial	KCNK1
SCAND1	0	0.705513	0.613	0.439	0	Epithelial	SCAND1
PLSCR1	0	0.705312	0.386	0.185	0	Epithelial	PLSCR1
GNG5	0	0.702597	0.68	0.531	0	Epithelial	GNG5
PDCD4	0	0.701293	0.719	0.54	0	Epithelial	PDCD4
IRF6	0	0.699945	0.273	0.071	0	Epithelial	IRF6
ANXA2	0	0.699097	0.714	0.44	0	Epithelial	ANXA2
ASAP2	0	0.696055	0.317	0.104	0	Epithelial	ASAP2
CACFD1	0	0.6957	0.256	0.061	0	Epithelial	CACFD1
SRGAP1	0	0.695393	0.306	0.097	0	Epithelial	SRGAP1
DYNC1LI2	0	0.6953	0.466	0.256	0	Epithelial	DYNC1LI2
APP	0	0.695252	0.568	0.272	0	Epithelial	APP
PIP5K1B	0	0.694568	0.274	0.09	0	Epithelial	PIP5K1B
RAVER2	0	0.692519	0.265	0.06	0	Epithelial	RAVER2
OPTN	0	0.692481	0.451	0.26	0	Epithelial	OPTN
PMM1	0	0.691946	0.323	0.118	0	Epithelial	PMM1
NEDD4L	0	0.691898	0.348	0.124	0	Epithelial	NEDD4L
NDUFS6	0	0.691845	0.664	0.543	0	Epithelial	NDUFS6
HADHA	0	0.691283	0.579	0.385	0	Epithelial	HADHA
NDUFB10	0	0.689366	0.498	0.333	0	Epithelial	NDUFB10
ATP6V0D1	0	0.688142	0.451	0.26	0	Epithelial	ATP6V0D1
CORO1B	0	0.688032	0.556	0.323	0	Epithelial	CORO1B
HADH	0	0.687136	0.311	0.135	0	Epithelial	HADH
GBP3	0	0.68667	0.284	0.099	0	Epithelial	GBP3
SLC37A1	0	0.686564	0.296	0.099	0	Epithelial	SLC37A1
SIRT7	0	0.686064	0.32	0.12	0	Epithelial	SIRT7
ID3	0	0.685447	0.527	0.299	0	Epithelial	ID3
LASP1	0	0.683916	0.422	0.228	0	Epithelial	LASP1
MLXIP	0	0.683769	0.505	0.3	0	Epithelial	MLXIP
MKRN1	0	0.683534	0.412	0.201	0	Epithelial	MKRN1
GBA2	0	0.683124	0.3	0.105	0	Epithelial	GBA2
CEBPA	0	0.680735	0.284	0.087	0	Epithelial	CEBPA
UPP1	0	0.680594	0.32	0.165	0	Epithelial	UPP1
GUCY2C	0	0.680116	0.263	0.076	0	Epithelial	GUCY2C
ATP1A1	0	0.679642	0.332	0.135	0	Epithelial	ATP1A1
FAM83E	0	0.678426	0.278	0.07	0	Epithelial	FAM83E
LRRFIP2	0	0.678392	0.365	0.167	0	Epithelial	LRRFIP2
TJP1	0	0.675992	0.295	0.108	0	Epithelial	TJP1
PLEKHA6	0	0.675647	0.281	0.079	0	Epithelial	PLEKHA6
NDUFB2	0	0.675464	0.613	0.498	0	Epithelial	NDUFB2
NDFIP2	0	0.675259	0.384	0.166	0	Epithelial	NDFIP2
ABHD11	0	0.673502	0.352	0.138	0	Epithelial	ABHD11
PRELID1	0	0.673387	0.523	0.386	0	Epithelial	PRELID1
ELMO3	0	0.672517	0.29	0.085	0	Epithelial	ELMO3
GPX2	0	0.671547	0.426	0.201	0	Epithelial	GPX2
ANO9	0	0.669675	0.344	0.129	0	Epithelial	ANO9
CORO2A	0	0.668496	0.271	0.073	0	Epithelial	CORO2A
MAGI1	0	0.665594	0.279	0.089	0	Epithelial	MAGI1
RRAS	0	0.66494	0.325	0.14	0	Epithelial	RRAS
SUCLG1	0	0.664853	0.444	0.302	0	Epithelial	SUCLG1
CENPX	0	0.664714	0.502	0.274	0	Epithelial	CENPX
IGF2BP2	0	0.661663	0.319	0.114	0	Epithelial	IGF2BP2
POR	0	0.660895	0.338	0.149	0	Epithelial	POR
SIPA1L2	0	0.660747	0.316	0.12	0	Epithelial	SIPA1L2
LMTK2	0	0.659278	0.264	0.079	0	Epithelial	LMTK2
ADCY6	0	0.657997	0.27	0.074	0	Epithelial	ADCY6
CC2D1A	0	0.657842	0.287	0.09	0	Epithelial	CC2D1A
NDUFC1	0	0.657106	0.504	0.341	0	Epithelial	NDUFC1
ZRANB2	0	0.654109	0.579	0.428	0	Epithelial	ZRANB2
MPND	0	0.653812	0.288	0.097	0	Epithelial	MPND
SPIRE2	0	0.653517	0.29	0.087	0	Epithelial	SPIRE2
UBL5	0	0.653193	0.745	0.672	0	Epithelial	UBL5
MCRIP2	0	0.652618	0.393	0.203	0	Epithelial	MCRIP2
TMEM30B	0	0.652394	0.277	0.078	0	Epithelial	TMEM30B
PRDX5	0	0.651487	0.645	0.565	0	Epithelial	PRDX5
ANK3	0	0.65048	0.263	0.07	0	Epithelial	ANK3
CDKN1A	0	0.650231	0.525	0.364	0	Epithelial	CDKN1A
MAP2K6	0	0.649491	0.298	0.113	0	Epithelial	MAP2K6
PDE8A	0	0.648	0.283	0.089	0	Epithelial	PDE8A
TPMT	0	0.647748	0.329	0.143	0	Epithelial	TPMT
LPCAT4	0	0.647615	0.294	0.101	0	Epithelial	LPCAT4
C19orf70	0	0.645754	0.516	0.394	0	Epithelial	C19orf70
RPS6KA1	0	0.645662	0.326	0.129	0	Epithelial	RPS6KA1
CDCP1	0	0.645444	0.287	0.092	0	Epithelial	CDCP1
ATP5MPL	0	0.644633	0.675	0.585	0	Epithelial	ATP5MPL
ABR	0	0.643524	0.304	0.125	0	Epithelial	ABR
BDH1	0	0.642639	0.272	0.072	0	Epithelial	BDH1
ETFA	0	0.641441	0.421	0.255	0	Epithelial	ETFA
ESRP1	0	0.641438	0.342	0.127	0	Epithelial	ESRP1
SCAMP2	0	0.639063	0.43	0.249	0	Epithelial	SCAMP2
PRKCD	0	0.63851	0.282	0.105	0	Epithelial	PRKCD
SELENOW	0	0.63811	0.527	0.329	0	Epithelial	SELENOW
SOWAHC	0	0.637955	0.262	0.086	0	Epithelial	SOWAHC
CMAS	0	0.634852	0.372	0.174	0	Epithelial	CMAS
CNST	0	0.63338	0.298	0.115	0	Epithelial	CNST
ADM	0	0.632988	0.29	0.126	0	Epithelial	ADM
RAPGEF5	0	0.631077	0.269	0.092	0	Epithelial	RAPGEF5
INSR	0	0.630389	0.419	0.23	0	Epithelial	INSR
MOB3B	0	0.628943	0.262	0.073	0	Epithelial	MOB3B
PARP12	0	0.628781	0.253	0.091	0	Epithelial	PARP12
OAF	0	0.628268	0.297	0.115	0	Epithelial	OAF
MAPK13	0	0.626655	0.349	0.15	0	Epithelial	MAPK13
EGFR	0	0.625892	0.255	0.076	0	Epithelial	EGFR
SPINT1-AS1	0	0.62474	0.262	0.062	0	Epithelial	SPINT1-AS1
EXPH5	0	0.62472	0.26	0.091	0	Epithelial	EXPH5
ATG4D	0	0.623436	0.261	0.087	0	Epithelial	ATG4D
TMEM125	0	0.622374	0.252	0.064	0	Epithelial	TMEM125
DDT	0	0.621932	0.571	0.463	0	Epithelial	DDT
PCSK7	0	0.621606	0.312	0.115	0	Epithelial	PCSK7
DHCR24	0	0.620103	0.255	0.081	0	Epithelial	DHCR24
KCNK6	0	0.617896	0.369	0.217	0	Epithelial	KCNK6
DHRS3	0	0.617206	0.317	0.126	0	Epithelial	DHRS3
CLCN3	0	0.616795	0.368	0.187	0	Epithelial	CLCN3
CAPN1	0	0.615488	0.396	0.209	0	Epithelial	CAPN1
ACAA1	0	0.614015	0.252	0.08	0	Epithelial	ACAA1
FHL2	0	0.613113	0.285	0.114	0	Epithelial	FHL2
DBI	0	0.612693	0.682	0.551	0	Epithelial	DBI
LUZP1	0	0.612275	0.399	0.199	0	Epithelial	LUZP1
AGR2	0	0.607897	0.711	0.249	0	Epithelial	AGR2
TIMM8B	0	0.607856	0.451	0.293	0	Epithelial	TIMM8B
NEO1	0	0.606829	0.299	0.11	0	Epithelial	NEO1
GRAMD4	0	0.606385	0.272	0.091	0	Epithelial	GRAMD4
NDUFS7	0	0.603922	0.404	0.254	0	Epithelial	NDUFS7
TPI1	0	0.603444	0.796	0.622	0	Epithelial	TPI1
VSIG10	0	0.601505	0.255	0.077	0	Epithelial	VSIG10
POLR2H	0	0.600989	0.394	0.233	0	Epithelial	POLR2H
ANKS4B	0	0.600604	0.25	0.066	0	Epithelial	ANKS4B
ATP9A	0	0.600492	0.264	0.089	0	Epithelial	ATP9A
GALE	0	0.599394	0.291	0.113	0	Epithelial	GALE
TMEM127	0	0.598967	0.265	0.114	0	Epithelial	TMEM127
EPHX2	0	0.598867	0.26	0.078	0	Epithelial	EPHX2
KIAA2013	0	0.598552	0.341	0.179	0	Epithelial	KIAA2013
SDF4	0	0.595839	0.526	0.379	0	Epithelial	SDF4
CHMP5	0	0.595733	0.455	0.298	0	Epithelial	CHMP5
HSBP1L1	0	0.593297	0.291	0.106	0	Epithelial	HSBP1L1
FUT6	0	0.593115	0.268	0.086	0	Epithelial	FUT6
ENDOD1	0	0.591402	0.275	0.095	0	Epithelial	ENDOD1
NDUFA6	0	0.590479	0.51	0.365	0	Epithelial	NDUFA6
IMPA2	0	0.58957	0.292	0.108	0	Epithelial	IMPA2
ZDHHC12	0	0.589083	0.357	0.177	0	Epithelial	ZDHHC12
EHF	0	0.58886	0.387	0.153	0	Epithelial	EHF
WDR1	0	0.588357	0.511	0.328	0	Epithelial	WDR1
METTL7A	0	0.588246	0.295	0.179	0	Epithelial	METTL7A
SCAP	0	0.588033	0.257	0.091	0	Epithelial	SCAP
MAP3K11	0	0.588003	0.29	0.133	0	Epithelial	MAP3K11
EFNB1	0	0.586373	0.273	0.099	0	Epithelial	EFNB1
MAML2	0	0.585165	0.376	0.193	0	Epithelial	MAML2
RAB1B	0	0.585105	0.387	0.206	0	Epithelial	RAB1B
TMEM106C	0	0.582166	0.352	0.159	0	Epithelial	TMEM106C
CANT1	0	0.581013	0.34	0.147	0	Epithelial	CANT1
MARK2	0	0.580702	0.361	0.178	0	Epithelial	MARK2
SLC35D1	0	0.576905	0.272	0.097	0	Epithelial	SLC35D1
NDUFA2	0	0.575411	0.473	0.333	0	Epithelial	NDUFA2
SPPL2B	0	0.575024	0.317	0.137	0	Epithelial	SPPL2B
CD164	0	0.573392	0.556	0.394	0	Epithelial	CD164
HEBP2	0	0.572087	0.487	0.312	0	Epithelial	HEBP2
ABCD3	0	0.571644	0.285	0.115	0	Epithelial	ABCD3
MRPL14	0	0.571253	0.435	0.266	0	Epithelial	MRPL14
TINAGL1	0	0.568339	0.312	0.118	0	Epithelial	TINAGL1
RARRES1	0	0.567098	0.284	0.091	0	Epithelial	RARRES1
WDR60	0	0.565783	0.314	0.16	0	Epithelial	WDR60
VDAC2	0	0.563916	0.481	0.338	0	Epithelial	VDAC2
GK5	0	0.562998	0.294	0.121	0	Epithelial	GK5
RNPEPL1	0	0.562796	0.44	0.281	0	Epithelial	RNPEPL1
EIF4EBP2	0	0.559728	0.372	0.216	0	Epithelial	EIF4EBP2
ALDH18A1	0	0.559335	0.277	0.141	0	Epithelial	ALDH18A1
LTBR	0	0.558879	0.3	0.14	0	Epithelial	LTBR
PDK4	0	0.558818	0.307	0.107	0	Epithelial	PDK4
MGST2	0	0.558583	0.336	0.164	0	Epithelial	MGST2
PHLDA2	0	0.558068	0.414	0.211	0	Epithelial	PHLDA2
GCC2	0	0.557529	0.677	0.499	0	Epithelial	GCC2
CAB39	0	0.556507	0.375	0.234	0	Epithelial	CAB39
ARHGAP21	0	0.554631	0.317	0.157	0	Epithelial	ARHGAP21
VAPA	0	0.551928	0.559	0.431	0	Epithelial	VAPA
WIPF2	0	0.550785	0.343	0.178	0	Epithelial	WIPF2
ECHDC2	0	0.549134	0.31	0.124	0	Epithelial	ECHDC2
NAA60	0	0.548772	0.268	0.113	0	Epithelial	NAA60
GHITM	0	0.548364	0.532	0.423	0	Epithelial	GHITM
ACO2	0	0.546302	0.344	0.192	0	Epithelial	ACO2
NT5C2	0	0.543185	0.253	0.121	0	Epithelial	NT5C2
GPR35	0	0.542586	0.255	0.099	0	Epithelial	GPR35
SDHB	0	0.542583	0.385	0.235	0	Epithelial	SDHB
ARHGAP32	0	0.54221	0.286	0.118	0	Epithelial	ARHGAP32
EMP2	0	0.542136	0.373	0.194	0	Epithelial	EMP2
PLPP1	0	0.542041	0.274	0.094	0	Epithelial	PLPP1
TM9SF3	0	0.540127	0.582	0.431	0	Epithelial	TM9SF3
FAM120AOS	0	0.539792	0.316	0.166	0	Epithelial	FAM120AOS
ITPR3	0	0.539743	0.299	0.142	0	Epithelial	ITPR3
AFG3L2	0	0.539592	0.342	0.186	0	Epithelial	AFG3L2
FAM213A	0	0.539534	0.272	0.138	0	Epithelial	FAM213A
TTC38	0	0.539084	0.258	0.097	0	Epithelial	TTC38
TPCN1	0	0.538149	0.267	0.112	0	Epithelial	TPCN1
HADHB	0	0.536599	0.38	0.241	0	Epithelial	HADHB
ZNHIT1	0	0.536207	0.5	0.36	0	Epithelial	ZNHIT1
NPTN	0	0.534935	0.337	0.175	0	Epithelial	NPTN
ELOVL1	0	0.533612	0.302	0.151	0	Epithelial	ELOVL1
UBXN6	0	0.532414	0.324	0.174	0	Epithelial	UBXN6
PON2	0	0.531769	0.317	0.145	0	Epithelial	PON2
EIF4G3	0	0.531561	0.331	0.189	0	Epithelial	EIF4G3
ARHGAP35	0	0.52911	0.275	0.119	0	Epithelial	ARHGAP35
AVPI1	0	0.528792	0.257	0.101	0	Epithelial	AVPI1
FGD4	0	0.527232	0.264	0.118	0	Epithelial	FGD4
IER3	0	0.527128	0.73	0.449	0	Epithelial	IER3
EXT1	0	0.526464	0.253	0.106	0	Epithelial	EXT1
EHBP1L1	0	0.526446	0.312	0.181	0	Epithelial	EHBP1L1
HOOK1	0	0.526168	0.276	0.122	0	Epithelial	HOOK1
NBR1	0	0.526096	0.34	0.195	0	Epithelial	NBR1
CTDSP2	0	0.525745	0.319	0.187	0	Epithelial	CTDSP2
FEM1C	0	0.525336	0.254	0.122	0	Epithelial	FEM1C
CHMP2B	0	0.524705	0.391	0.249	0	Epithelial	CHMP2B
AP2S1	0	0.523435	0.539	0.376	0	Epithelial	AP2S1
ZSWIM6	0	0.523074	0.285	0.134	0	Epithelial	ZSWIM6
FNBP1L	0	0.522918	0.275	0.118	0	Epithelial	FNBP1L
COX17	0	0.522738	0.499	0.38	0	Epithelial	COX17
TOX3	0	0.521327	0.253	0.088	0	Epithelial	TOX3
PAWR	0	0.520239	0.269	0.112	0	Epithelial	PAWR
RHOB	0	0.520203	0.556	0.381	0	Epithelial	RHOB
RAB11A	0	0.520076	0.429	0.259	0	Epithelial	RAB11A
ENTPD6	0	0.520019	0.297	0.142	0	Epithelial	ENTPD6
TAOK3	0	0.519863	0.427	0.263	0	Epithelial	TAOK3
STXBP2	0	0.519617	0.296	0.143	0	Epithelial	STXBP2
GPBP1L1	0	0.519596	0.374	0.217	0	Epithelial	GPBP1L1
MSRB2	0	0.51859	0.332	0.181	0	Epithelial	MSRB2
GDE1	0	0.518119	0.323	0.175	0	Epithelial	GDE1
STK24	0	0.517852	0.419	0.264	0	Epithelial	STK24
CST3	0	0.517421	0.325	0.157	0	Epithelial	CST3
PPP1R1B	0	0.516509	0.271	0.142	0	Epithelial	PPP1R1B
FNIP2	0	0.515536	0.268	0.126	0	Epithelial	FNIP2
SERPINB6	0	0.513718	0.43	0.262	0	Epithelial	SERPINB6
PGRMC1	0	0.513056	0.392	0.217	0	Epithelial	PGRMC1
CTSS	0	0.510381	0.518	0.301	0	Epithelial	CTSS
ENDOG	0	0.509244	0.286	0.149	0	Epithelial	ENDOG
MYO10	0	0.508789	0.292	0.135	0	Epithelial	MYO10
VPS4B	0	0.507379	0.451	0.281	0	Epithelial	VPS4B
SIGIRR	0	0.506659	0.438	0.277	0	Epithelial	SIGIRR
CDK11A	0	0.505138	0.309	0.167	0	Epithelial	CDK11A
PHYKPL	0	0.503791	0.257	0.108	0	Epithelial	PHYKPL
NDUFS2	0	0.501091	0.402	0.268	0	Epithelial	NDUFS2
TUBA1C	0	0.500192	0.314	0.162	0	Epithelial	TUBA1C
HTATIP2	0	0.500163	0.325	0.172	0	Epithelial	HTATIP2
MINK1	0	0.498915	0.264	0.115	0	Epithelial	MINK1
CMPK1	0	0.498611	0.539	0.405	0	Epithelial	CMPK1
UQCC3	0	0.498431	0.339	0.198	0	Epithelial	UQCC3
PARP4	0	0.497387	0.304	0.162	0	Epithelial	PARP4
WDR13	0	0.496025	0.313	0.174	0	Epithelial	WDR13
PLGRKT	0	0.495877	0.347	0.194	0	Epithelial	PLGRKT
GNAQ	0	0.495093	0.371	0.197	0	Epithelial	GNAQ
IVNS1ABP	0	0.492996	0.532	0.363	0	Epithelial	IVNS1ABP
SLK	0	0.490128	0.426	0.267	0	Epithelial	SLK
CYFIP1	0	0.489426	0.3	0.154	0	Epithelial	CYFIP1
GNB2	0	0.486895	0.534	0.388	0	Epithelial	GNB2
TRIOBP	0	0.482648	0.314	0.156	0	Epithelial	TRIOBP
PPP6R2	0	0.481684	0.308	0.175	0	Epithelial	PPP6R2
NCOR1	0	0.480091	0.59	0.446	0	Epithelial	NCOR1
PERP	0	0.477057	0.521	0.242	0	Epithelial	PERP
MRPS36	0	0.475998	0.403	0.272	0	Epithelial	MRPS36
CALCOCO2	0	0.47576	0.406	0.263	0	Epithelial	CALCOCO2
HNRNPAB	0	0.473569	0.625	0.469	0	Epithelial	HNRNPAB
FAM102A	0	0.472386	0.312	0.159	0	Epithelial	FAM102A
SEC23A	0	0.472068	0.253	0.134	0	Epithelial	SEC23A
HRAS	0	0.471507	0.262	0.128	0	Epithelial	HRAS
MAP7	0	0.471228	0.335	0.148	0	Epithelial	MAP7
CCDC186	0	0.469646	0.483	0.349	0	Epithelial	CCDC186
TRIM2	0	0.469031	0.302	0.144	0	Epithelial	TRIM2
ARHGAP26	0	0.468764	0.309	0.157	0	Epithelial	ARHGAP26
PAK1	0	0.468092	0.257	0.125	0	Epithelial	PAK1
PPM1A	0	0.467419	0.264	0.131	0	Epithelial	PPM1A
NPEPPS	0	0.466389	0.341	0.202	0	Epithelial	NPEPPS
MLX	0	0.465894	0.268	0.137	0	Epithelial	MLX
PPP2R1A	0	0.464224	0.397	0.26	0	Epithelial	PPP2R1A
SMIM15	0	0.463001	0.347	0.21	0	Epithelial	SMIM15
DSTN	0	0.458094	0.71	0.498	0	Epithelial	DSTN
CDC42BPB	0	0.457746	0.255	0.132	0	Epithelial	CDC42BPB
CNPPD1	0	0.457343	0.288	0.156	0	Epithelial	CNPPD1
PPIC	0	0.456025	0.298	0.127	0	Epithelial	PPIC
ARRDC1	0	0.452619	0.272	0.139	0	Epithelial	ARRDC1
ARF1	0	0.447946	0.687	0.582	0	Epithelial	ARF1
VASP	0	0.44717	0.472	0.306	0	Epithelial	VASP
SLC40A1	0	0.446146	0.292	0.127	0	Epithelial	SLC40A1
TMEM87B	0	0.445733	0.289	0.158	0	Epithelial	TMEM87B
IDH1	0	0.443722	0.251	0.132	0	Epithelial	IDH1
PXN	0	0.442133	0.25	0.116	0	Epithelial	PXN
PPP4C	0	0.439473	0.419	0.28	0	Epithelial	PPP4C
AES	0	0.438893	0.624	0.485	0	Epithelial	AES
ROCK2	0	0.43764	0.432	0.269	0	Epithelial	ROCK2
GLTP	0	0.437567	0.293	0.153	0	Epithelial	GLTP
HDAC1	0	0.436265	0.409	0.255	0	Epithelial	HDAC1
RREB1	0	0.43589	0.263	0.143	0	Epithelial	RREB1
CAMK2D	0	0.433106	0.345	0.197	0	Epithelial	CAMK2D
RETREG2	0	0.432494	0.292	0.168	0	Epithelial	RETREG2
ZDHHC21	0	0.430328	0.253	0.134	0	Epithelial	ZDHHC21
MIEN1	0	0.426671	0.353	0.218	0	Epithelial	MIEN1
DIAPH2	0	0.425315	0.316	0.183	0	Epithelial	DIAPH2
EPAS1	0	0.422921	0.287	0.107	0	Epithelial	EPAS1
ARHGEF12	0	0.42255	0.285	0.161	0	Epithelial	ARHGEF12
KRCC1	0	0.417267	0.311	0.179	0	Epithelial	KRCC1
LCOR	0	0.417238	0.261	0.139	0	Epithelial	LCOR
MYH9	0	0.417032	0.663	0.475	0	Epithelial	MYH9
GOLGB1	0	0.416273	0.764	0.656	0	Epithelial	GOLGB1
LRP1	0	0.413022	0.263	0.123	0	Epithelial	LRP1
ITGA6	0	0.408844	0.471	0.303	0	Epithelial	ITGA6
LAMP1	0	0.408508	0.505	0.338	0	Epithelial	LAMP1
GALNT3	0	0.407832	0.306	0.166	0	Epithelial	GALNT3
VAV3	0	0.40354	0.256	0.11	0	Epithelial	VAV3
ACOT13	0	0.401882	0.356	0.223	0	Epithelial	ACOT13
MYL12A	0	0.401678	0.787	0.702	0	Epithelial	MYL12A
EZR	0	0.39719	0.792	0.67	0	Epithelial	EZR
SORL1	0	0.395875	0.288	0.144	0	Epithelial	SORL1
SH3BGRL3	0	0.393202	0.855	0.754	0	Epithelial	SH3BGRL3
TOB1	0	0.388743	0.544	0.378	0	Epithelial	TOB1
RNF5	0	0.388334	0.268	0.144	0	Epithelial	RNF5
CTBP2	0	0.384773	0.317	0.176	0	Epithelial	CTBP2
ETS2	0	0.369044	0.441	0.27	0	Epithelial	ETS2
UBB	0	0.348656	0.925	0.909	0	Epithelial	UBB
TUBB4B	0	0.335864	0.755	0.666	0	Epithelial	TUBB4B
SAT1	0	0.303077	0.863	0.687	0	Epithelial	SAT1
JUN	0	0.301644	0.947	0.857	0	Epithelial	JUN
HSPG2	0	0.287714	0.255	0.097	0	Epithelial	HSPG2
METRNL	0	0.284639	0.374	0.204	0	Epithelial	METRNL
S100A13	0	0.284069	0.337	0.193	0	Epithelial	S100A13
THBS1	0	0.267262	0.359	0.13	0	Epithelial	THBS1
KDM7A	8.60881e-308	0.423628	0.291	0.164	1.88137e-303	Epithelial	KDM7A
CBR1	1.73376e-304	0.497227	0.291	0.172	3.78896e-300	Epithelial	CBR1
SH3KBP1	5.16532e-303	0.396996	0.481	0.338	1.12883e-298	Epithelial	SH3KBP1
NDUFS1	1.28027e-300	0.495685	0.368	0.24	2.79791e-296	Epithelial	NDUFS1
ZMYND8	1.02127e-299	0.476882	0.381	0.249	2.23188e-295	Epithelial	ZMYND8
HSPB1	1.2209e-297	0.341389	0.51	0.365	2.66815e-293	Epithelial	HSPB1
MRPL27	4.86639e-297	0.431019	0.365	0.237	1.0635e-292	Epithelial	MRPL27
ACAT1	2.96466e-296	0.478328	0.27	0.158	6.47896e-292	Epithelial	ACAT1
SOS2	8.05304e-294	0.417495	0.278	0.158	1.75991e-289	Epithelial	SOS2
IST1	4.67687e-293	0.439711	0.368	0.238	1.02208e-288	Epithelial	IST1
KIF3B	1.27895e-292	0.408745	0.265	0.148	2.79501e-288	Epithelial	KIF3B
CRIM1	7.5372e-291	0.333255	0.253	0.135	1.64718e-286	Epithelial	CRIM1
TC2N	1.12474e-290	0.331706	0.252	0.131	2.45801e-286	Epithelial	TC2N
TMOD3	1.16952e-290	0.36937	0.288	0.164	2.55588e-286	Epithelial	TMOD3
HBEGF	7.64371e-289	0.398114	0.304	0.176	1.67046e-284	Epithelial	HBEGF
AK3	1.20586e-286	0.422596	0.364	0.238	2.63529e-282	Epithelial	AK3
SPAG9	5.31454e-286	0.493607	0.432	0.303	1.16144e-281	Epithelial	SPAG9
TMEM131	1.28056e-285	0.462821	0.36	0.236	2.79854e-281	Epithelial	TMEM131
NCKAP1	4.23323e-281	0.354736	0.271	0.151	9.2513e-277	Epithelial	NCKAP1
KIAA1109	8.78865e-279	0.426484	0.365	0.233	1.92067e-274	Epithelial	KIAA1109
SREBF2	4.34815e-276	0.373863	0.252	0.14	9.50244e-272	Epithelial	SREBF2
SERPINB1	9.48496e-276	0.316688	0.463	0.315	2.07284e-271	Epithelial	SERPINB1
ATG4B	2.78487e-275	0.414584	0.262	0.15	6.08606e-271	Epithelial	ATG4B
ZKSCAN1	9.00513e-275	0.413593	0.434	0.294	1.96798e-270	Epithelial	ZKSCAN1
STK38	4.70798e-274	0.363146	0.289	0.169	1.02888e-269	Epithelial	STK38
CTDSP1	5.75298e-274	0.401341	0.291	0.172	1.25726e-269	Epithelial	CTDSP1
IER2	1.65076e-273	0.29208	0.84	0.778	3.60757e-269	Epithelial	IER2
SPTAN1	3.16946e-273	0.381042	0.395	0.258	6.92654e-269	Epithelial	SPTAN1
PRELID3B	9.51115e-272	0.393538	0.358	0.232	2.07857e-267	Epithelial	PRELID3B
NUPR1	7.46874e-271	0.754941	0.267	0.15	1.63222e-266	Epithelial	NUPR1
NOSIP	1.01367e-270	0.420124	0.331	0.211	2.21528e-266	Epithelial	NOSIP
SELENOS	1.20031e-268	0.521931	0.461	0.36	2.62315e-264	Epithelial	SELENOS
CHMP3	4.31429e-267	0.367157	0.326	0.204	9.42846e-263	Epithelial	CHMP3
TGOLN2	1.16284e-266	0.396893	0.577	0.45	2.54127e-262	Epithelial	TGOLN2
TMUB1	1.83375e-266	0.432301	0.318	0.201	4.00749e-262	Epithelial	TMUB1
PRKACB	1.51507e-262	0.337431	0.297	0.175	3.31103e-258	Epithelial	PRKACB
FAR1	6.567e-262	0.445748	0.281	0.169	1.43515e-257	Epithelial	FAR1
ORMDL2	1.29967e-261	0.413444	0.303	0.19	2.84031e-257	Epithelial	ORMDL2
MGST3	7.70227e-261	0.539705	0.412	0.309	1.68325e-256	Epithelial	MGST3
COX8A	5.06507e-258	0.372086	0.291	0.179	1.10692e-253	Epithelial	COX8A
RPS6KA5	2.06271e-256	0.391266	0.301	0.181	4.50784e-252	Epithelial	RPS6KA5
XIAP	8.6538e-255	0.428963	0.38	0.261	1.8912e-250	Epithelial	XIAP
NT5C3A	9.40319e-255	0.4321	0.34	0.224	2.05497e-250	Epithelial	NT5C3A
SCARB2	3.31553e-253	0.455132	0.327	0.216	7.24575e-249	Epithelial	SCARB2
BRMS1	2.05637e-251	0.410056	0.291	0.18	4.49398e-247	Epithelial	BRMS1
RALBP1	3.4934e-251	0.424696	0.409	0.289	7.63448e-247	Epithelial	RALBP1
DLG1	1.18089e-248	0.425434	0.274	0.167	2.58071e-244	Epithelial	DLG1
DYNC1I2	2.30086e-247	0.377452	0.289	0.176	5.0283e-243	Epithelial	DYNC1I2
NDUFA3	1.36018e-245	0.487148	0.398	0.294	2.97253e-241	Epithelial	NDUFA3
MPC1	1.50321e-245	0.47082	0.386	0.284	3.28511e-241	Epithelial	MPC1
POLR2J	1.97935e-245	0.441236	0.469	0.364	4.32566e-241	Epithelial	POLR2J
KMT5B	6.62764e-245	0.361581	0.25	0.145	1.4484e-240	Epithelial	KMT5B
SH3PXD2A	7.96007e-245	0.371697	0.301	0.186	1.73959e-240	Epithelial	SH3PXD2A
QSOX1	1.44104e-244	0.477376	0.305	0.19	3.14925e-240	Epithelial	QSOX1
CALM3	1.88323e-244	0.381608	0.468	0.344	4.11561e-240	Epithelial	CALM3
MGAT4A	6.986e-244	0.264542	0.289	0.169	1.52672e-239	Epithelial	MGAT4A
ZNF217	1.68169e-243	0.414516	0.347	0.228	3.67517e-239	Epithelial	ZNF217
JOSD2	2.60743e-243	0.408344	0.27	0.165	5.69828e-239	Epithelial	JOSD2
MARCKSL1	1.26277e-242	0.297431	0.522	0.382	2.75966e-238	Epithelial	MARCKSL1
HINT1	1.25776e-241	0.354421	0.782	0.783	2.7487e-237	Epithelial	HINT1
VDAC1	1.31944e-241	0.372867	0.508	0.386	2.88351e-237	Epithelial	VDAC1
UBR2	2.02051e-241	0.469902	0.348	0.236	4.41562e-237	Epithelial	UBR2
RMND5A	1.70925e-240	0.425118	0.273	0.166	3.73539e-236	Epithelial	RMND5A
ADIPOR2	4.4118e-238	0.362374	0.252	0.147	9.64156e-234	Epithelial	ADIPOR2
GPR160	1.38374e-237	0.431438	0.281	0.18	3.02403e-233	Epithelial	GPR160
KRAS	6.02832e-237	0.34686	0.406	0.283	1.31743e-232	Epithelial	KRAS
SDHA	1.96707e-236	0.434764	0.324	0.218	4.29884e-232	Epithelial	SDHA
ARHGDIA	4.52349e-236	0.395939	0.293	0.185	9.88563e-232	Epithelial	ARHGDIA
PRKCSH	7.67863e-236	0.436927	0.417	0.305	1.67809e-231	Epithelial	PRKCSH
GNPTAB	1.69023e-235	0.491029	0.322	0.215	3.69383e-231	Epithelial	GNPTAB
CRK	5.4815e-235	0.394417	0.344	0.23	1.19793e-230	Epithelial	CRK
TIMM13	8.49189e-235	0.446469	0.441	0.33	1.85582e-230	Epithelial	TIMM13
RPS27L	1.36584e-234	0.412204	0.577	0.501	2.98492e-230	Epithelial	RPS27L
EIF4E	2.67794e-234	0.515423	0.268	0.165	5.85237e-230	Epithelial	EIF4E
ZNF622	4.57117e-234	0.451693	0.32	0.212	9.98983e-230	Epithelial	ZNF622
TSTD1	6.66718e-234	0.449148	0.422	0.314	1.45705e-229	Epithelial	TSTD1
SLC16A1	2.04847e-232	0.437306	0.284	0.179	4.47672e-228	Epithelial	SLC16A1
NDUFS3	1.21287e-229	0.437404	0.364	0.261	2.6506e-225	Epithelial	NDUFS3
NCOA4	4.09023e-229	0.374018	0.339	0.225	8.93879e-225	Epithelial	NCOA4
SQSTM1	6.38806e-229	0.587795	0.589	0.496	1.39605e-224	Epithelial	SQSTM1
CALM2	8.33158e-229	0.319121	0.265	0.158	1.82078e-224	Epithelial	CALM2
ATP5PD	3.21305e-226	0.463785	0.539	0.458	7.0218e-222	Epithelial	ATP5PD
FAM120A	1.5112e-223	0.423483	0.476	0.367	3.30257e-219	Epithelial	FAM120A
RER1	1.62455e-223	0.44199	0.47	0.379	3.55028e-219	Epithelial	RER1
TMEM219	2.46116e-222	0.421731	0.449	0.35	5.37861e-218	Epithelial	TMEM219
S100P	2.62069e-222	0.492227	0.272	0.159	5.72725e-218	Epithelial	S100P
ZCCHC10	6.90244e-221	0.337076	0.288	0.18	1.50846e-216	Epithelial	ZCCHC10
CLPTM1	3.78034e-220	0.411937	0.277	0.178	8.26156e-216	Epithelial	CLPTM1
ATP5MF	2.05778e-219	0.423746	0.523	0.433	4.49707e-215	Epithelial	ATP5MF
OCIAD2	1.50757e-218	0.353625	0.436	0.313	3.29464e-214	Epithelial	OCIAD2
CLTC	3.44988e-218	0.399333	0.44	0.327	7.53937e-214	Epithelial	CLTC
CYCS	6.33861e-217	0.400824	0.669	0.625	1.38524e-212	Epithelial	CYCS
PPP1CA	1.94751e-216	0.376862	0.54	0.445	4.25608e-212	Epithelial	PPP1CA
TMEM87A	1.09214e-215	0.377772	0.376	0.263	2.38677e-211	Epithelial	TMEM87A
DYNLT1	1.7982e-215	0.341226	0.458	0.339	3.92978e-211	Epithelial	DYNLT1
RTN4	4.02931e-213	0.310836	0.529	0.398	8.80565e-209	Epithelial	RTN4
PNRC2	5.29931e-213	0.330983	0.406	0.286	1.15811e-208	Epithelial	PNRC2
FAM177A1	1.90367e-209	0.321129	0.337	0.229	4.16028e-205	Epithelial	FAM177A1
ATP2A3	1.33069e-201	0.327398	0.363	0.252	2.90808e-197	Epithelial	ATP2A3
NDUFV1	1.24786e-200	0.545113	0.39	0.306	2.72708e-196	Epithelial	NDUFV1
GOLGA3	4.23776e-200	0.405744	0.347	0.248	9.2612e-196	Epithelial	GOLGA3
CLIC1	7.01674e-200	0.257046	0.751	0.693	1.53344e-195	Epithelial	CLIC1
VPS51	2.29202e-199	0.417142	0.407	0.31	5.00898e-195	Epithelial	VPS51
PDHA1	8.14782e-199	0.407938	0.314	0.215	1.78063e-194	Epithelial	PDHA1
IDH3G	3.96787e-196	0.371816	0.355	0.255	8.67139e-192	Epithelial	IDH3G
USP12	7.77474e-196	0.362341	0.294	0.193	1.69909e-191	Epithelial	USP12
NDUFB9	1.84299e-195	0.375326	0.333	0.234	4.02768e-191	Epithelial	NDUFB9
SMAP1	6.46791e-194	0.34018	0.379	0.274	1.4135e-189	Epithelial	SMAP1
PPP1R11	4.83522e-190	0.319709	0.253	0.16	1.05669e-185	Epithelial	PPP1R11
NCBP2-AS2	2.8853e-189	0.312964	0.258	0.163	6.30553e-185	Epithelial	NCBP2-AS2
RASD1	1.63994e-188	0.393568	0.281	0.179	3.58392e-184	Epithelial	RASD1
PSMB8	4.12632e-188	0.333352	0.54	0.442	9.01765e-184	Epithelial	PSMB8
Z93241.1	1.78214e-186	0.677148	0.253	0.165	3.89468e-182	Epithelial	Z93241.1
H2AFY	3.4854e-186	0.278622	0.491	0.357	7.617e-182	Epithelial	H2AFY
DCTPP1	6.79726e-186	0.31606	0.28	0.181	1.48547e-181	Epithelial	DCTPP1
TMCO1	2.6074e-184	0.444329	0.394	0.308	5.6982e-180	Epithelial	TMCO1
GUK1	4.88816e-183	0.340617	0.696	0.657	1.06826e-178	Epithelial	GUK1
RAB11B	1.44277e-182	0.350427	0.322	0.225	3.15304e-178	Epithelial	RAB11B
EAPP	2.72013e-181	0.32939	0.369	0.27	5.94458e-177	Epithelial	EAPP
SMG1	4.48441e-181	0.328583	0.4	0.289	9.80024e-177	Epithelial	SMG1
UBA1	5.82206e-181	0.387662	0.329	0.233	1.27235e-176	Epithelial	UBA1
RERE	3.9009e-180	0.338491	0.35	0.245	8.52503e-176	Epithelial	RERE
SNX9	4.06106e-179	0.28007	0.301	0.197	8.87504e-175	Epithelial	SNX9
HLA-F	3.41176e-178	0.368496	0.421	0.317	7.45605e-174	Epithelial	HLA-F
RNF7	4.71186e-178	0.355853	0.466	0.375	1.02973e-173	Epithelial	RNF7
LRRC75A	1.97423e-177	0.294813	0.302	0.201	4.31449e-173	Epithelial	LRRC75A
SPSB3	2.20434e-177	0.335047	0.332	0.233	4.81736e-173	Epithelial	SPSB3
SLC25A3	2.617e-177	0.313131	0.715	0.679	5.71919e-173	Epithelial	SLC25A3
RSRP1	4.7935e-177	0.333808	0.322	0.221	1.04757e-172	Epithelial	RSRP1
GAS6	2.97172e-175	0.427067	0.288	0.202	6.49439e-171	Epithelial	GAS6
RAB10	3.10878e-175	0.333616	0.414	0.314	6.79393e-171	Epithelial	RAB10
UVSSA	1.31655e-174	0.340155	0.25	0.16	2.87719e-170	Epithelial	UVSSA
TAPBP	8.71075e-171	0.357525	0.628	0.561	1.90365e-166	Epithelial	TAPBP
UQCRC2	9.46965e-171	0.38422	0.421	0.331	2.0695e-166	Epithelial	UQCRC2
APOL6	3.63465e-169	0.375273	0.359	0.261	7.94316e-165	Epithelial	APOL6
FLII	1.43426e-167	0.332756	0.273	0.183	3.13443e-163	Epithelial	FLII
ELMSAN1	1.60902e-167	0.283698	0.264	0.171	3.51635e-163	Epithelial	ELMSAN1
CERS6	6.36634e-166	0.301922	0.26	0.168	1.3913e-161	Epithelial	CERS6
TAF10	1.92122e-164	0.357545	0.447	0.361	4.19863e-160	Epithelial	TAF10
FLOT1	4.16327e-163	0.310553	0.336	0.241	9.09841e-159	Epithelial	FLOT1
UQCRFS1	7.59487e-162	0.405831	0.383	0.303	1.65978e-157	Epithelial	UQCRFS1
AAK1	8.10919e-162	0.26898	0.261	0.167	1.77218e-157	Epithelial	AAK1
PPP1R10	3.35957e-160	0.377355	0.66	0.606	7.342e-156	Epithelial	PPP1R10
UBE2K	6.96617e-158	0.318983	0.406	0.313	1.52239e-153	Epithelial	UBE2K
YIPF3	1.97983e-157	0.407817	0.359	0.28	4.32672e-153	Epithelial	YIPF3
FBXL15	3.71256e-156	0.3134	0.263	0.179	8.11342e-152	Epithelial	FBXL15
ECH1	9.84946e-156	0.378281	0.445	0.37	2.1525e-151	Epithelial	ECH1
MIER1	4.90167e-155	0.255355	0.37	0.27	1.07121e-150	Epithelial	MIER1
NDUFV3	1.33659e-154	0.365476	0.284	0.202	2.92099e-150	Epithelial	NDUFV3
FAM32A	5.38351e-153	0.30855	0.291	0.203	1.17651e-148	Epithelial	FAM32A
REEP3	2.75429e-150	0.328033	0.278	0.194	6.01922e-146	Epithelial	REEP3
SH3GLB1	3.26461e-149	0.375329	0.469	0.397	7.13449e-145	Epithelial	SH3GLB1
HINT2	3.61543e-148	0.345017	0.281	0.201	7.90116e-144	Epithelial	HINT2
MUC2	7.10722e-148	1.02685	0.286	0.187	1.55321e-143	Epithelial	MUC2
TRIM56	8.36046e-148	0.283358	0.275	0.186	1.8271e-143	Epithelial	TRIM56
RALGPS2	1.12378e-147	0.368661	0.327	0.245	2.4559e-143	Epithelial	RALGPS2
GSTK1	3.10955e-147	0.290998	0.269	0.183	6.79561e-143	Epithelial	GSTK1
RTCB	2.31729e-146	0.317633	0.291	0.207	5.06421e-142	Epithelial	RTCB
LAMTOR3	1.67592e-145	0.301276	0.254	0.172	3.66256e-141	Epithelial	LAMTOR3
LPIN2	1.52343e-144	0.371242	0.313	0.22	3.32931e-140	Epithelial	LPIN2
MPC2	3.00383e-144	0.364192	0.448	0.376	6.56458e-140	Epithelial	MPC2
IFI35	1.64614e-143	0.383486	0.271	0.193	3.59748e-139	Epithelial	IFI35
PGLS	2.16235e-143	0.308463	0.411	0.32	4.7256e-139	Epithelial	PGLS
VPS36	5.10183e-140	0.295469	0.343	0.255	1.11495e-135	Epithelial	VPS36
IQGAP2	8.64724e-140	0.251742	0.389	0.296	1.88977e-135	Epithelial	IQGAP2
MTCH1	1.40477e-139	0.262411	0.449	0.348	3.06999e-135	Epithelial	MTCH1
SUSD6	1.57797e-135	0.32619	0.252	0.172	3.44849e-131	Epithelial	SUSD6
DYNLRB1	6.07139e-135	0.360258	0.485	0.414	1.32684e-130	Epithelial	DYNLRB1
DNPEP	8.56779e-135	0.289765	0.251	0.173	1.87241e-130	Epithelial	DNPEP
GPAA1	2.85745e-134	0.335781	0.292	0.215	6.24467e-130	Epithelial	GPAA1
CCNL2	5.0269e-134	0.317836	0.32	0.235	1.09858e-129	Epithelial	CCNL2
PHB	9.99257e-133	0.297358	0.28	0.198	2.18378e-128	Epithelial	PHB
NEDD9	1.35451e-132	0.294672	0.279	0.196	2.96014e-128	Epithelial	NEDD9
KLHDC2	4.96468e-132	0.34952	0.293	0.216	1.08498e-127	Epithelial	KLHDC2
NDUFB4	4.78242e-131	0.343336	0.49	0.432	1.04515e-126	Epithelial	NDUFB4
CAT	1.55216e-129	0.304667	0.28	0.199	3.39209e-125	Epithelial	CAT
LAMTOR2	1.20806e-128	0.316016	0.361	0.282	2.64009e-124	Epithelial	LAMTOR2
TUBB2A	1.9148e-126	0.341242	0.255	0.176	4.1846e-122	Epithelial	TUBB2A
SSNA1	1.20923e-124	0.316559	0.378	0.302	2.64266e-120	Epithelial	SSNA1
DGKD	1.48625e-124	0.264116	0.259	0.18	3.24805e-120	Epithelial	DGKD
EBP	3.63457e-123	0.274214	0.308	0.227	7.94299e-119	Epithelial	EBP
AFF1	1.93866e-122	0.319275	0.261	0.188	4.23675e-118	Epithelial	AFF1
PYCARD	1.704e-120	0.458738	0.363	0.299	3.72392e-116	Epithelial	PYCARD
FIS1	1.76463e-120	0.339543	0.527	0.483	3.85642e-116	Epithelial	FIS1
TLE4	6.62694e-119	0.306002	0.412	0.328	1.44825e-114	Epithelial	TLE4
CHCHD5	1.74812e-118	0.307028	0.288	0.215	3.82033e-114	Epithelial	CHCHD5
CARHSP1	6.92306e-118	0.326681	0.291	0.214	1.51297e-113	Epithelial	CARHSP1
C1orf122	7.15167e-118	0.327952	0.328	0.258	1.56293e-113	Epithelial	C1orf122
PRPF4B	9.79373e-118	0.273669	0.479	0.395	2.14032e-113	Epithelial	PRPF4B
SLC52A2	1.10673e-117	0.297019	0.27	0.198	2.41864e-113	Epithelial	SLC52A2
IER5L	1.65982e-117	0.380036	0.362	0.277	3.62736e-113	Epithelial	IER5L
SDC1	8.29171e-114	0.350778	0.318	0.25	1.81207e-109	Epithelial	SDC1
GOLGA2	1.19609e-112	0.299294	0.323	0.249	2.61394e-108	Epithelial	GOLGA2
XAF1	1.40451e-112	0.497426	0.257	0.185	3.06943e-108	Epithelial	XAF1
AFF4	9.18764e-111	0.300104	0.347	0.272	2.00787e-106	Epithelial	AFF4
ARFGEF1	6.1696e-110	0.252874	0.251	0.177	1.34831e-105	Epithelial	ARFGEF1
SRRM2	1.08973e-108	0.3141	0.629	0.591	2.3815e-104	Epithelial	SRRM2
BIRC6	4.63918e-107	0.284128	0.387	0.31	1.01385e-102	Epithelial	BIRC6
AUP1	8.95864e-106	0.347123	0.415	0.358	1.95782e-101	Epithelial	AUP1
ASH1L	5.4763e-105	0.270843	0.533	0.466	1.19679e-100	Epithelial	ASH1L
TUFM	2.96329e-104	0.346846	0.502	0.461	6.47597e-100	Epithelial	TUFM
ISOC2	1.00859e-103	0.339545	0.301	0.236	2.20418e-99	Epithelial	ISOC2
SLIRP	5.23359e-103	0.286612	0.315	0.246	1.14375e-98	Epithelial	SLIRP
BAG6	4.87225e-102	0.279296	0.255	0.188	1.06478e-97	Epithelial	BAG6
GTF2F1	1.78578e-99	0.279711	0.253	0.186	3.90265e-95	Epithelial	GTF2F1
BRWD1	6.24217e-99	0.25363	0.253	0.183	1.36416e-94	Epithelial	BRWD1
PDXK	1.16292e-98	0.31598	0.377	0.317	2.54145e-94	Epithelial	PDXK
YIPF4	1.5068e-98	0.252676	0.252	0.183	3.29295e-94	Epithelial	YIPF4
COPE	4.09383e-97	0.311275	0.49	0.447	8.94666e-93	Epithelial	COPE
GALNT1	4.95784e-97	0.254495	0.323	0.252	1.08349e-92	Epithelial	GALNT1
CLINT1	6.33443e-97	0.346773	0.44	0.389	1.38433e-92	Epithelial	CLINT1
DECR1	4.27286e-96	0.254518	0.274	0.21	9.3379e-92	Epithelial	DECR1
TXN2	2.70779e-95	0.312436	0.339	0.275	5.91761e-91	Epithelial	TXN2
SNF8	3.2379e-95	0.276447	0.338	0.272	7.07611e-91	Epithelial	SNF8
ACIN1	2.0987e-94	0.269347	0.38	0.307	4.58651e-90	Epithelial	ACIN1
MDH2	2.11666e-94	0.294141	0.412	0.35	4.62574e-90	Epithelial	MDH2
CHCHD1	5.43434e-93	0.257005	0.335	0.271	1.18762e-88	Epithelial	CHCHD1
TCF25	1.21323e-92	0.268354	0.595	0.552	2.65139e-88	Epithelial	TCF25
AKR7A2	4.34046e-90	0.270743	0.288	0.226	9.48565e-86	Epithelial	AKR7A2
ADI1	6.38281e-90	0.316417	0.361	0.304	1.3949e-85	Epithelial	ADI1
DCTN2	7.16016e-89	0.264577	0.311	0.249	1.56478e-84	Epithelial	DCTN2
PTGES2	5.09738e-87	0.282529	0.253	0.192	1.11398e-82	Epithelial	PTGES2
P4HB	1.52697e-86	0.25361	0.575	0.531	3.33705e-82	Epithelial	P4HB
RTN3	1.94073e-84	0.295964	0.345	0.288	4.24127e-80	Epithelial	RTN3
DDRGK1	1.2025e-81	0.255427	0.303	0.243	2.62795e-77	Epithelial	DDRGK1
AP3B1	1.54278e-80	0.27399	0.305	0.244	3.37159e-76	Epithelial	AP3B1
MED29	1.44684e-79	0.315917	0.279	0.219	3.16193e-75	Epithelial	MED29
MRPL34	2.16899e-79	0.272787	0.334	0.279	4.74011e-75	Epithelial	MRPL34
ATP5F1C	4.95689e-76	0.29992	0.453	0.411	1.08328e-71	Epithelial	ATP5F1C
TMEM160	1.3651e-75	0.275804	0.401	0.351	2.98328e-71	Epithelial	TMEM160
BAZ2A	1.08448e-74	0.254876	0.316	0.258	2.37002e-70	Epithelial	BAZ2A
OS9	5.92058e-73	0.298522	0.408	0.367	1.29388e-68	Epithelial	OS9
XRN1	3.02724e-71	0.350324	0.369	0.323	6.61573e-67	Epithelial	XRN1
LMBRD1	1.86671e-70	0.262635	0.269	0.216	4.07951e-66	Epithelial	LMBRD1
DPM3	3.14003e-70	0.252932	0.322	0.27	6.86223e-66	Epithelial	DPM3
PHPT1	3.10437e-68	0.251783	0.507	0.474	6.78429e-64	Epithelial	PHPT1
SURF1	6.43884e-62	0.273431	0.322	0.28	1.40714e-57	Epithelial	SURF1
TMSB10	1.38649e-61	0.432285	0.907	0.974	3.03002e-57	Epithelial	TMSB10
ATP5PB	8.18343e-60	0.299944	0.404	0.368	1.78841e-55	Epithelial	ATP5PB
DAP	1.08156e-59	0.259026	0.269	0.222	2.36364e-55	Epithelial	DAP
CPEB4	1.26551e-59	0.28812	0.333	0.287	2.76565e-55	Epithelial	CPEB4
ATP5MC1	7.13357e-58	0.493353	0.428	0.429	1.55897e-53	Epithelial	ATP5MC1
FAM173A	1.31531e-57	0.25183	0.278	0.235	2.87447e-53	Epithelial	FAM173A
PTK2B	1.15208e-55	0.261138	0.267	0.22	2.51775e-51	Epithelial	PTK2B
ATP5F1A	7.00278e-36	0.326504	0.48	0.493	1.53039e-31	Epithelial	ATP5F1A
NOTCH4	0	4.60028	0.408	0.06	0	Malignant	NOTCH4
CLCA1	0	4.31353	0.314	0.041	0	Malignant	CLCA1
ITLN1	0	3.94771	0.383	0.04	0	Malignant	ITLN1
TFF3	0	3.54736	0.86	0.255	0	Malignant	TFF3
FCGBP1	0	2.71867	0.562	0.255	0	Malignant	FCGBP
ACADS	0	2.60387	0.304	0.029	0	Malignant	ACADS
AGR21	0	2.55694	0.843	0.261	0	Malignant	AGR2
WFDC2	0	2.48023	0.445	0.068	0	Malignant	WFDC2
KLK1	0	2.45112	0.526	0.075	0	Malignant	KLK1
MUC21	0	2.40027	0.587	0.128	0	Malignant	MUC2
SPINK1	0	2.36009	0.637	0.121	0	Malignant	SPINK1
SLC12A2	0	2.27667	0.764	0.157	0	Malignant	SLC12A2
REP15	0	2.26932	0.366	0.042	0	Malignant	REP15
ST6GALNAC1	0	2.11756	0.512	0.118	0	Malignant	ST6GALNAC1
LCN21	0	1.95559	0.462	0.13	0	Malignant	LCN2
SERPINA1	0	1.88774	0.5	0.102	0	Malignant	SERPINA1
CENPF	0	1.83497	0.268	0.038	0	Malignant	CENPF
GPX21	0	1.82931	0.71	0.157	0	Malignant	GPX2
ALDH6A1	0	1.77072	0.968	0.395	0	Malignant	ALDH6A1
SOX9	0	1.72528	0.619	0.095	0	Malignant	SOX9
IGFBP2	0	1.7179	0.56	0.086	0	Malignant	IGFBP2
S100P1	0	1.68528	0.561	0.103	0	Malignant	S100P
MKI67	0	1.65954	0.278	0.026	0	Malignant	MKI67
SOX41	0	1.64395	0.802	0.29	0	Malignant	SOX4
GDF15	0	1.57106	0.468	0.082	0	Malignant	GDF15
PERP1	0	1.45376	0.62	0.245	0	Malignant	PERP
PCCA	0	1.43445	0.341	0.075	0	Malignant	PCCA
IVD	0	1.32805	0.6	0.155	0	Malignant	IVD
SCD	0	1.32455	0.33	0.057	0	Malignant	SCD
RNF43	0	1.31358	0.415	0.054	0	Malignant	RNF43
DSP1	0	1.30309	0.756	0.245	0	Malignant	DSP
HEPACAM2	0	1.28368	0.28	0.049	0	Malignant	HEPACAM2
GSTP1	0	1.27968	0.863	0.629	0	Malignant	GSTP1
ELF31	0	1.26042	0.929	0.336	0	Malignant	ELF3
FERMT1	0	1.23048	0.496	0.08	0	Malignant	FERMT1
EHF1	0	1.22907	0.586	0.13	0	Malignant	EHF
TCIM1	0	1.22141	0.412	0.12	0	Malignant	TCIM
SPDEF	0	1.20779	0.324	0.05	0	Malignant	SPDEF
ERN21	0	1.2068	0.525	0.131	0	Malignant	ERN2
ITGA61	0	1.20189	0.663	0.275	0	Malignant	ITGA6
PLCB4	0	1.19603	0.446	0.075	0	Malignant	PLCB4
ZKSCAN11	0	1.18278	0.657	0.256	0	Malignant	ZKSCAN1
AC103702.21	0	1.17912	0.624	0.174	0	Malignant	AC103702.2
MUC41	0	1.17434	0.464	0.149	0	Malignant	MUC4
MARCKSL11	0	1.17404	0.743	0.345	0	Malignant	MARCKSL1
ZG161	0	1.15771	0.371	0.187	0	Malignant	ZG16
ARFGEF3	0	1.15021	0.413	0.039	0	Malignant	ARFGEF3
PPP1R1B1	0	1.14976	0.543	0.092	0	Malignant	PPP1R1B
NOTCH3	0	1.13837	0.787	0.54	0	Malignant	NOTCH3
KIAA1324	0	1.13664	0.327	0.035	0	Malignant	KIAA1324
TPM11	0	1.13061	0.767	0.292	0	Malignant	TPM1
KLF51	0	1.12754	0.723	0.249	0	Malignant	KLF5
HMGA1	0	1.11105	0.573	0.228	0	Malignant	HMGA1
MAP71	0	1.09845	0.528	0.121	0	Malignant	MAP7
ETS21	0	1.09233	0.657	0.237	0	Malignant	ETS2
DPEP1	0	1.06446	0.266	0.029	0	Malignant	DPEP1
PHLDA21	0	1.06213	0.518	0.206	0	Malignant	PHLDA2
RASD11	0	1.0572	0.399	0.162	0	Malignant	RASD1
FAT11	0	1.04858	0.582	0.181	0	Malignant	FAT1
CDC42EP51	0	1.04621	0.735	0.293	0	Malignant	CDC42EP5
MLPH	0	1.04581	0.386	0.065	0	Malignant	MLPH
FAM3D1	0	1.04564	0.705	0.289	0	Malignant	FAM3D
RPL36	0	1.0422	0.974	0.952	0	Malignant	RPL36
PTMS	0	1.04078	0.547	0.197	0	Malignant	PTMS
CD91	0	1.01711	0.775	0.389	0	Malignant	CD9
CRACR2B	0	1.01512	0.435	0.109	0	Malignant	CRACR2B
FRYL1	0	1.00452	0.658	0.331	0	Malignant	FRYL
ACAT1	0	0.99868	0.376	0.068	0	Malignant	ACAT1
TRIM21	0	0.996038	0.504	0.112	0	Malignant	TRIM2
GALNT31	0	0.982584	0.506	0.134	0	Malignant	GALNT3
WNK4	0	0.976857	0.341	0.049	0	Malignant	WNK4
ARGLU1	0	0.971241	0.839	0.612	0	Malignant	ARGLU1
CREB3L1	0	0.968394	0.355	0.083	0	Malignant	CREB3L1
TCEA31	0	0.968101	0.475	0.155	0	Malignant	TCEA3
CD241	0	0.962124	0.653	0.239	0	Malignant	CD24
SLC7A8	0	0.957257	0.404	0.082	0	Malignant	SLC7A8
EMP21	0	0.956931	0.563	0.167	0	Malignant	EMP2
TSTA3	0	0.951851	0.523	0.196	0	Malignant	TSTA3
APP1	0	0.950814	0.676	0.274	0	Malignant	APP
GALNT5	0	0.947248	0.372	0.08	0	Malignant	GALNT5
CDX21	0	0.943272	0.577	0.182	0	Malignant	CDX2
EPHB3	0	0.940213	0.279	0.019	0	Malignant	EPHB3
GFPT11	0	0.938653	0.616	0.288	0	Malignant	GFPT1
KCNQ1OT1	0	0.938551	0.678	0.428	0	Malignant	KCNQ1OT1
CKAP4	0	0.925742	0.452	0.177	0	Malignant	CKAP4
S100A11	0	0.919608	0.738	0.513	0	Malignant	S100A11
SLC7A5	0	0.916856	0.472	0.118	0	Malignant	SLC7A5
HMGB1	0	0.916706	0.841	0.721	0	Malignant	HMGB1
BACE2	0	0.914847	0.431	0.091	0	Malignant	BACE2
CTBP21	0	0.91177	0.495	0.148	0	Malignant	CTBP2
TM9SF31	0	0.909442	0.715	0.415	0	Malignant	TM9SF3
IER31	0	0.907058	0.783	0.463	0	Malignant	IER3
ROCK21	0	0.903062	0.591	0.247	0	Malignant	ROCK2
MLEC	0	0.900637	0.565	0.273	0	Malignant	MLEC
ASCL2	0	0.899576	0.255	0.019	0	Malignant	ASCL2
MACC1	0	0.899333	0.352	0.067	0	Malignant	MACC1
MYO61	0	0.898869	0.548	0.191	0	Malignant	MYO6
ESRP11	0	0.895283	0.485	0.114	0	Malignant	ESRP1
VEGFA1	0	0.892662	0.603	0.264	0	Malignant	VEGFA
AFDN1	0	0.891471	0.603	0.227	0	Malignant	AFDN
HMGCL	0	0.880296	0.465	0.148	0	Malignant	HMGCL
S100A141	0	0.879594	0.684	0.25	0	Malignant	S100A14
ENC1	0	0.877636	0.377	0.08	0	Malignant	ENC1
H1F01	0	0.877473	0.528	0.194	0	Malignant	H1F0
S100A161	0	0.87696	0.54	0.191	0	Malignant	S100A16
CEACAM61	0	0.875671	0.406	0.165	0	Malignant	CEACAM6
KNOP1	0	0.872662	0.455	0.14	0	Malignant	KNOP1
TGFBI	0	0.866986	0.336	0.078	0	Malignant	TGFBI
CCND1	0	0.866712	0.418	0.117	0	Malignant	CCND1
RPL35	0	0.862935	0.971	0.933	0	Malignant	RPL35
SNORC	0	0.861863	0.347	0.069	0	Malignant	SNORC
NORAD	0	0.86113	0.624	0.341	0	Malignant	NORAD
ITGA2	0	0.857417	0.35	0.049	0	Malignant	ITGA2
RAB251	0	0.855257	0.505	0.137	0	Malignant	RAB25
CD46	0	0.854423	0.583	0.297	0	Malignant	CD46
TMEM2381	0	0.852971	0.717	0.369	0	Malignant	TMEM238
HDLBP	0	0.852763	0.704	0.443	0	Malignant	HDLBP
GGH	0	0.851507	0.356	0.1	0	Malignant	GGH
RPL12	0	0.85104	0.976	0.949	0	Malignant	RPL12
CHDH	0	0.844555	0.35	0.058	0	Malignant	CHDH
KLF41	0	0.844262	0.65	0.359	0	Malignant	KLF4
NEDD4L1	0	0.843129	0.403	0.132	0	Malignant	NEDD4L
TSPAN13	0	0.837294	0.411	0.147	0	Malignant	TSPAN13
SYTL21	0	0.835317	0.447	0.211	0	Malignant	SYTL2
GOLIM41	0	0.830872	0.597	0.281	0	Malignant	GOLIM4
AGR31	0	0.829687	0.476	0.17	0	Malignant	AGR3
IL13RA1	0	0.827961	0.436	0.152	0	Malignant	IL13RA1
RNASE1	0	0.826864	0.386	0.105	0	Malignant	RNASE1
EIF3B	0	0.825158	0.487	0.192	0	Malignant	EIF3B
MYC	0	0.822701	0.373	0.107	0	Malignant	MYC
MYO101	0	0.822283	0.455	0.112	0	Malignant	MYO10
GAPDH	0	0.820663	0.934	0.872	0	Malignant	GAPDH
ITPR2	0	0.813323	0.385	0.199	0	Malignant	ITPR2
ACTN1	0	0.813098	0.477	0.118	0	Malignant	ACTN1
TIMM131	0	0.807715	0.61	0.301	0	Malignant	TIMM13
TXN1	0	0.805432	0.816	0.633	0	Malignant	TXN
ABHD2	0	0.804205	0.406	0.164	0	Malignant	ABHD2
MET	0	0.800098	0.325	0.037	0	Malignant	MET
PMEPA1	0	0.800049	0.379	0.209	0	Malignant	PMEPA1
RPS18	0	0.79813	0.981	0.961	0	Malignant	RPS18
TRAP1	0	0.798083	0.383	0.089	0	Malignant	TRAP1
DSG21	0	0.797703	0.607	0.216	0	Malignant	DSG2
AKAP91	0	0.796783	0.859	0.657	0	Malignant	AKAP9
ANXA21	0	0.794001	0.716	0.465	0	Malignant	ANXA2
TKT	0	0.793827	0.527	0.247	0	Malignant	TKT
GALNT121	0	0.792962	0.418	0.138	0	Malignant	GALNT12
VIL11	0	0.792311	0.541	0.178	0	Malignant	VIL1
CYC11	0	0.79194	0.642	0.337	0	Malignant	CYC1
SPTBN11	0	0.791136	0.692	0.348	0	Malignant	SPTBN1
RPL8	0	0.789647	0.979	0.96	0	Malignant	RPL8
PPA1	0	0.782307	0.587	0.411	0	Malignant	PPA1
NUPR11	0	0.780909	0.376	0.136	0	Malignant	NUPR1
ATP1B11	0	0.780859	0.712	0.363	0	Malignant	ATP1B1
SLPI1	0	0.770946	0.308	0.102	0	Malignant	SLPI
MCF2L	0	0.76859	0.281	0.043	0	Malignant	MCF2L
DNAJC10	0	0.767096	0.427	0.158	0	Malignant	DNAJC10
EPCAM1	0	0.76476	0.819	0.308	0	Malignant	EPCAM
PHB1	0	0.760605	0.47	0.162	0	Malignant	PHB
EPHB2	0	0.75982	0.32	0.037	0	Malignant	EPHB2
SCNN1A1	0	0.759368	0.489	0.154	0	Malignant	SCNN1A
CLDN41	0	0.753347	0.888	0.336	0	Malignant	CLDN4
RPS2	0	0.751491	0.978	0.928	0	Malignant	RPS2
MLXIP1	0	0.748902	0.59	0.3	0	Malignant	MLXIP
KIF5B	0	0.743829	0.688	0.421	0	Malignant	KIF5B
FDFT1	0	0.743512	0.442	0.176	0	Malignant	FDFT1
GNE	0	0.742032	0.287	0.08	0	Malignant	GNE
CERS61	0	0.740546	0.435	0.137	0	Malignant	CERS6
ADGRG1	0	0.737958	0.376	0.061	0	Malignant	ADGRG1
PTPRF1	0	0.737695	0.593	0.208	0	Malignant	PTPRF
FASN	0	0.732539	0.309	0.064	0	Malignant	FASN
MUC5B	0	0.73233	0.25	0.049	0	Malignant	MUC5B
RPL31	0	0.729514	0.882	0.762	0	Malignant	RPL31
HMGCS1	0	0.72753	0.366	0.159	0	Malignant	HMGCS1
ARHGAP321	0	0.72563	0.412	0.105	0	Malignant	ARHGAP32
GOLGB11	0	0.725133	0.833	0.65	0	Malignant	GOLGB1
IMPDH2	0	0.725052	0.439	0.17	0	Malignant	IMPDH2
BAZ2B	0	0.724091	0.476	0.232	0	Malignant	BAZ2B
EEF2	0	0.724071	0.821	0.672	0	Malignant	EEF2
ADAM15	0	0.723458	0.41	0.113	0	Malignant	ADAM15
GALNT71	0	0.722619	0.473	0.193	0	Malignant	GALNT7
PKM	0	0.722336	0.591	0.378	0	Malignant	PKM
CDCA7	0	0.718787	0.261	0.027	0	Malignant	CDCA7
TMSB101	0	0.718681	0.991	0.949	0	Malignant	TMSB10
RPL37A	0	0.718341	0.954	0.922	0	Malignant	RPL37A
CHD7	0	0.716177	0.412	0.123	0	Malignant	CHD7
RPS24	0	0.716082	0.961	0.929	0	Malignant	RPS24
TTC3	0	0.715395	0.655	0.411	0	Malignant	TTC3
PTBP3	0	0.714939	0.594	0.332	0	Malignant	PTBP3
SH3PXD2A1	0	0.714478	0.41	0.172	0	Malignant	SH3PXD2A
DSTN1	0	0.713827	0.765	0.505	0	Malignant	DSTN
IRF2BP2	0	0.713443	0.623	0.35	0	Malignant	IRF2BP2
AHCY	0	0.713416	0.393	0.127	0	Malignant	AHCY
QSOX11	0	0.708734	0.443	0.169	0	Malignant	QSOX1
GPRC5A1	0	0.70574	0.473	0.198	0	Malignant	GPRC5A
NUCKS1	0	0.705177	0.707	0.49	0	Malignant	NUCKS1
MYO5C	0	0.70451	0.343	0.081	0	Malignant	MYO5C
HDGF	0	0.704454	0.538	0.273	0	Malignant	HDGF
PDZD8	0	0.702227	0.44	0.147	0	Malignant	PDZD8
ABLIM1	0	0.702025	0.489	0.17	0	Malignant	ABLIM1
TRIM44	0	0.698999	0.556	0.309	0	Malignant	TRIM44
ANXA41	0	0.697672	0.532	0.252	0	Malignant	ANXA4
RAB11FIP11	0	0.696262	0.711	0.441	0	Malignant	RAB11FIP1
DIAPH21	0	0.696205	0.446	0.166	0	Malignant	DIAPH2
AHI1	0	0.69535	0.505	0.24	0	Malignant	AHI1
DDR11	0	0.694024	0.469	0.147	0	Malignant	DDR1
SNHG19	0	0.693579	0.347	0.1	0	Malignant	SNHG19
LRPPRC	0	0.693289	0.455	0.163	0	Malignant	LRPPRC
HPCAL1	0	0.692007	0.362	0.141	0	Malignant	HPCAL1
CENPX1	0	0.691604	0.551	0.283	0	Malignant	CENPX
SDC41	0	0.691401	0.484	0.184	0	Malignant	SDC4
ABHD111	0	0.688667	0.432	0.139	0	Malignant	ABHD11
EFNB21	0	0.686894	0.487	0.182	0	Malignant	EFNB2
FUT61	0	0.68404	0.328	0.089	0	Malignant	FUT6
ASPH	0	0.683838	0.376	0.106	0	Malignant	ASPH
MECOM	0	0.680175	0.366	0.079	0	Malignant	MECOM
HSPD1	0	0.680089	0.698	0.52	0	Malignant	HSPD1
FOXA3	0	0.679245	0.3	0.057	0	Malignant	FOXA3
LGALS41	0	0.678925	0.906	0.36	0	Malignant	LGALS4
C19orf48	0	0.678874	0.313	0.066	0	Malignant	C19orf48
AL390719.2	0	0.678748	0.26	0.056	0	Malignant	AL390719.2
ACTG1	0	0.675457	0.952	0.895	0	Malignant	ACTG1
TFF11	0	0.674524	0.302	0.109	0	Malignant	TFF1
LEFTY1	0	0.673901	0.266	0.058	0	Malignant	LEFTY1
SURF6	0	0.673745	0.38	0.113	0	Malignant	SURF6
CANX	0	0.673692	0.612	0.42	0	Malignant	CANX
ATP5MC11	0	0.672238	0.593	0.391	0	Malignant	ATP5MC1
MCM7	0	0.671839	0.311	0.083	0	Malignant	MCM7
NKTR	0	0.671128	0.639	0.398	0	Malignant	NKTR
SRPK1	0	0.670344	0.445	0.177	0	Malignant	SRPK1
ANO91	0	0.669638	0.397	0.137	0	Malignant	ANO9
NCKAP11	0	0.669261	0.435	0.125	0	Malignant	NCKAP1
RRBP11	0	0.66809	0.81	0.534	0	Malignant	RRBP1
POF1B1	0	0.667242	0.482	0.161	0	Malignant	POF1B
JUP1	0	0.666327	0.536	0.208	0	Malignant	JUP
DKC1	0	0.665653	0.376	0.132	0	Malignant	DKC1
DEK	0	0.664851	0.642	0.387	0	Malignant	DEK
KDELR1	0	0.66437	0.616	0.404	0	Malignant	KDELR1
PAICS	0	0.663892	0.355	0.101	0	Malignant	PAICS
CHD6	0	0.662852	0.426	0.188	0	Malignant	CHD6
FBL	0	0.662364	0.519	0.259	0	Malignant	FBL
S100A131	0	0.659737	0.463	0.178	0	Malignant	S100A13
EIF4G1	0	0.659214	0.537	0.28	0	Malignant	EIF4G1
CDK10	0	0.658962	0.369	0.116	0	Malignant	CDK10
TMPRSS41	0	0.658788	0.5	0.166	0	Malignant	TMPRSS4
ATP8B11	0	0.658596	0.565	0.214	0	Malignant	ATP8B1
CANT11	0	0.658518	0.426	0.145	0	Malignant	CANT1
S100A61	0	0.658071	0.987	0.812	0	Malignant	S100A6
CDH11	0	0.65646	0.591	0.214	0	Malignant	CDH1
DOPEY2	0	0.652291	0.304	0.082	0	Malignant	DOPEY2
HES11	0	0.652079	0.644	0.315	0	Malignant	HES1
PLPP21	0	0.651011	0.412	0.141	0	Malignant	PLPP2
EIF3A	0	0.650279	0.681	0.483	0	Malignant	EIF3A
RPLP0	0	0.649688	0.886	0.816	0	Malignant	RPLP0
MRPS35	0	0.648193	0.419	0.13	0	Malignant	MRPS35
ILF3	0	0.647156	0.52	0.257	0	Malignant	ILF3
EIF4EBP1	0	0.646939	0.371	0.122	0	Malignant	EIF4EBP1
SMARCC1	0	0.646876	0.491	0.213	0	Malignant	SMARCC1
TSPAN81	0	0.645468	0.758	0.32	0	Malignant	TSPAN8
SERPINB61	0	0.64485	0.527	0.256	0	Malignant	SERPINB6
EPPK1	0	0.644107	0.319	0.075	0	Malignant	EPPK1
HSD11B21	0	0.642799	0.447	0.196	0	Malignant	HSD11B2
SNHG18	0	0.64262	0.349	0.091	0	Malignant	SNHG18
SPRY2	0	0.642548	0.326	0.091	0	Malignant	SPRY2
FAM120A1	0	0.642381	0.609	0.346	0	Malignant	FAM120A
HDAC2	0	0.641826	0.421	0.162	0	Malignant	HDAC2
KRTCAP3	0	0.641085	0.355	0.065	0	Malignant	KRTCAP3
LGALS3BP1	0	0.640586	0.735	0.321	0	Malignant	LGALS3BP
EIF5B	0	0.639762	0.675	0.461	0	Malignant	EIF5B
LYZ	0	0.639374	0.384	0.123	0	Malignant	LYZ
MBOAT2	0	0.637431	0.31	0.071	0	Malignant	MBOAT2
TAF1D	0	0.637193	0.512	0.25	0	Malignant	TAF1D
NRARP1	0	0.636629	0.467	0.227	0	Malignant	NRARP
RHOB1	0	0.636505	0.607	0.386	0	Malignant	RHOB
ZFHX3	0	0.636327	0.318	0.102	0	Malignant	ZFHX3
WDR34	0	0.635839	0.305	0.093	0	Malignant	WDR34
RABL61	0	0.634811	0.54	0.271	0	Malignant	RABL6
ENO1	0	0.63454	0.683	0.53	0	Malignant	ENO1
YWHAE	0	0.634462	0.7	0.53	0	Malignant	YWHAE
NOXO1	0	0.634254	0.3	0.061	0	Malignant	NOXO1
ANXA3	0	0.633343	0.293	0.059	0	Malignant	ANXA3
HMGB3	0	0.633107	0.309	0.078	0	Malignant	HMGB3
EFNA11	0	0.632987	0.406	0.154	0	Malignant	EFNA1
FAM13A	0	0.632213	0.337	0.126	0	Malignant	FAM13A
LLGL21	0	0.630501	0.573	0.233	0	Malignant	LLGL2
NANS1	0	0.630408	0.563	0.354	0	Malignant	NANS
POLD2	0	0.628811	0.33	0.09	0	Malignant	POLD2
PCLO1	0	0.627403	0.269	0.089	0	Malignant	PCLO
ATP5ME1	0	0.626885	0.846	0.671	0	Malignant	ATP5ME
CBFA2T2	0	0.624676	0.296	0.082	0	Malignant	CBFA2T2
GGCT	0	0.623198	0.366	0.117	0	Malignant	GGCT
NOP56	0	0.622202	0.501	0.278	0	Malignant	NOP56
SLC25A6	0	0.622175	0.836	0.714	0	Malignant	SLC25A6
LSM7	0	0.620311	0.669	0.458	0	Malignant	LSM7
P4HB1	0	0.619176	0.682	0.511	0	Malignant	P4HB
MRPS34	0	0.618391	0.555	0.339	0	Malignant	MRPS34
VMP11	0	0.616982	0.746	0.535	0	Malignant	VMP1
ATP5F1B1	0	0.616841	0.731	0.525	0	Malignant	ATP5F1B
MRPL57	0	0.616717	0.598	0.377	0	Malignant	MRPL57
UQCRH	0	0.616434	0.765	0.667	0	Malignant	UQCRH
SNRPD2	0	0.616183	0.664	0.458	0	Malignant	SNRPD2
NHP2	0	0.615839	0.469	0.231	0	Malignant	NHP2
DMAC1	0	0.615057	0.429	0.172	0	Malignant	DMAC1
TRIM28	0	0.61342	0.506	0.246	0	Malignant	TRIM28
EIF2S2	0	0.612415	0.581	0.401	0	Malignant	EIF2S2
SET	0	0.611647	0.64	0.478	0	Malignant	SET
TNRC18	0	0.610162	0.359	0.112	0	Malignant	TNRC18
PDZK1IP11	0	0.610018	0.321	0.089	0	Malignant	PDZK1IP1
SIPA1L21	0	0.60896	0.352	0.13	0	Malignant	SIPA1L2
EXPH51	0	0.608528	0.333	0.09	0	Malignant	EXPH5
ANKRD36C	0	0.607876	0.367	0.177	0	Malignant	ANKRD36C
HNRNPAB1	0	0.607819	0.674	0.472	0	Malignant	HNRNPAB
RACK1	0	0.604804	0.86	0.768	0	Malignant	RACK1
DCTPP11	0	0.604645	0.427	0.157	0	Malignant	DCTPP1
SLC39A11	0	0.603097	0.279	0.083	0	Malignant	SLC39A11
MAL21	0	0.602652	0.49	0.168	0	Malignant	MAL2
KRT81	0	0.601608	0.945	0.363	0	Malignant	KRT8
ENAH	0	0.601375	0.304	0.055	0	Malignant	ENAH
MIA3	0	0.601318	0.424	0.236	0	Malignant	MIA3
SNRNP70	0	0.600263	0.604	0.358	0	Malignant	SNRNP70
PKP21	0	0.600064	0.403	0.121	0	Malignant	PKP2
TMC51	0	0.599677	0.476	0.185	0	Malignant	TMC5
DYNC1H1	0	0.59952	0.602	0.351	0	Malignant	DYNC1H1
VDAC11	0	0.599331	0.574	0.382	0	Malignant	VDAC1
FDPS	0	0.59917	0.453	0.261	0	Malignant	FDPS
ARHGEF10L	0	0.595393	0.32	0.093	0	Malignant	ARHGEF10L
IGF2BP21	0	0.594957	0.376	0.12	0	Malignant	IGF2BP2
CCNL21	0	0.594847	0.441	0.215	0	Malignant	CCNL2
ISOC21	0	0.59461	0.432	0.212	0	Malignant	ISOC2
LUC7L3	0	0.593588	0.74	0.573	0	Malignant	LUC7L3
DDAH1	0	0.592893	0.364	0.083	0	Malignant	DDAH1
IER5L1	0	0.592461	0.46	0.263	0	Malignant	IER5L
NUMA1	0	0.590781	0.445	0.207	0	Malignant	NUMA1
ALDH21	0	0.588937	0.568	0.278	0	Malignant	ALDH2
RPL36A	0	0.585132	0.628	0.414	0	Malignant	RPL36A
ALDH1A1	0	0.584755	0.251	0.072	0	Malignant	ALDH1A1
TUFM1	0	0.58452	0.627	0.436	0	Malignant	TUFM
PDIA4	0	0.584245	0.554	0.363	0	Malignant	PDIA4
CLDN31	0	0.584113	0.86	0.324	0	Malignant	CLDN3
NTHL1	0	0.584004	0.351	0.105	0	Malignant	NTHL1
GOLGA21	0	0.583648	0.457	0.225	0	Malignant	GOLGA2
NXPE11	0	0.583621	0.312	0.137	0	Malignant	NXPE1
RERE1	0	0.58288	0.467	0.228	0	Malignant	RERE
RAB13	0	0.582659	0.428	0.157	0	Malignant	RAB13
UQCRC11	0	0.582116	0.665	0.365	0	Malignant	UQCRC1
CDH171	0	0.579495	0.627	0.25	0	Malignant	CDH17
PKP31	0	0.578834	0.494	0.18	0	Malignant	PKP3
WDR601	0	0.57862	0.375	0.16	0	Malignant	WDR60
TRPM41	0	0.578405	0.4	0.165	0	Malignant	TRPM4
PTCD3	0	0.578319	0.419	0.163	0	Malignant	PTCD3
ATP5MC31	0	0.577587	0.77	0.602	0	Malignant	ATP5MC3
PHF14	0	0.576845	0.436	0.184	0	Malignant	PHF14
MDH21	0	0.576423	0.545	0.325	0	Malignant	MDH2
SPTLC2	0	0.574918	0.349	0.139	0	Malignant	SPTLC2
SPPL2B1	0	0.574733	0.366	0.142	0	Malignant	SPPL2B
FAM83E1	0	0.574299	0.27	0.091	0	Malignant	FAM83E
IPO5	0	0.574118	0.339	0.116	0	Malignant	IPO5
PSMB7	0	0.573752	0.514	0.322	0	Malignant	PSMB7
SLC44A41	0	0.57365	0.648	0.259	0	Malignant	SLC44A4
PAWR1	0	0.573626	0.349	0.108	0	Malignant	PAWR
HSD17B12	0	0.572759	0.418	0.194	0	Malignant	HSD17B12
CLUH	0	0.571301	0.332	0.096	0	Malignant	CLUH
FNBP1L1	0	0.571281	0.373	0.11	0	Malignant	FNBP1L
CLMN1	0	0.571076	0.417	0.203	0	Malignant	CLMN
LRP5	0	0.570246	0.315	0.085	0	Malignant	LRP5
GADD45GIP1	0	0.570119	0.578	0.396	0	Malignant	GADD45GIP1
BDP1	0	0.570081	0.534	0.31	0	Malignant	BDP1
HEBP21	0	0.569625	0.549	0.314	0	Malignant	HEBP2
EI24	0	0.569597	0.42	0.163	0	Malignant	EI24
CCDC34	0	0.569173	0.256	0.05	0	Malignant	CCDC34
LGALS91	0	0.568579	0.493	0.231	0	Malignant	LGALS9
HMG20B	0	0.567596	0.323	0.125	0	Malignant	HMG20B
TPI11	0	0.567137	0.793	0.639	0	Malignant	TPI1
TOX31	0	0.567085	0.338	0.084	0	Malignant	TOX3
NFATC2IP	0	0.567038	0.488	0.244	0	Malignant	NFATC2IP
ERGIC1	0	0.565658	0.443	0.232	0	Malignant	ERGIC1
H2AFY1	0	0.56515	0.607	0.343	0	Malignant	H2AFY
D2HGDH	0	0.564988	0.302	0.102	0	Malignant	D2HGDH
NDUFS61	0	0.563852	0.713	0.543	0	Malignant	NDUFS6
ACSS21	0	0.563806	0.391	0.167	0	Malignant	ACSS2
LTBR1	0	0.562676	0.388	0.134	0	Malignant	LTBR
SMG11	0	0.562329	0.525	0.271	0	Malignant	SMG1
TMEM123	0	0.561693	0.577	0.341	0	Malignant	TMEM123
PRKDC	0	0.561031	0.492	0.284	0	Malignant	PRKDC
CCT6A	0	0.559296	0.512	0.279	0	Malignant	CCT6A
PRRC2A	0	0.557362	0.393	0.159	0	Malignant	PRRC2A
SERBP1	0	0.556416	0.728	0.566	0	Malignant	SERBP1
PAXBP1	0	0.555738	0.366	0.157	0	Malignant	PAXBP1
TCERG1	0	0.555537	0.437	0.184	0	Malignant	TCERG1
ENTPD61	0	0.552949	0.372	0.139	0	Malignant	ENTPD6
USH1C1	0	0.552689	0.455	0.16	0	Malignant	USH1C
CDX11	0	0.552631	0.55	0.2	0	Malignant	CDX1
CCT5	0	0.552304	0.492	0.265	0	Malignant	CCT5
KCTD3	0	0.552212	0.279	0.057	0	Malignant	KCTD3
LARP1	0	0.549314	0.503	0.279	0	Malignant	LARP1
CDC42EP1	0	0.548196	0.282	0.061	0	Malignant	CDC42EP1
ENGASE	0	0.547818	0.3	0.096	0	Malignant	ENGASE
PLXNB1	0	0.54774	0.274	0.072	0	Malignant	PLXNB1
RPS21	0	0.547605	0.898	0.87	0	Malignant	RPS21
WDR43	0	0.54742	0.39	0.155	0	Malignant	WDR43
SNRPF	0	0.546774	0.521	0.313	0	Malignant	SNRPF
NET11	0	0.546521	0.534	0.231	0	Malignant	NET1
KCNQ1	0	0.545918	0.263	0.07	0	Malignant	KCNQ1
TM9SF2	0	0.545823	0.522	0.321	0	Malignant	TM9SF2
CCT3	0	0.545679	0.501	0.292	0	Malignant	CCT3
ITPR31	0	0.54456	0.382	0.138	0	Malignant	ITPR3
TRABD2A	0	0.543806	0.312	0.075	0	Malignant	TRABD2A
NUDT8	0	0.543519	0.261	0.077	0	Malignant	NUDT8
RPL13	0	0.542553	0.976	0.931	0	Malignant	RPL13
ECI11	0	0.542466	0.543	0.312	0	Malignant	ECI1
SERPINB11	0	0.542191	0.548	0.309	0	Malignant	SERPINB1
RIF1	0	0.542026	0.403	0.186	0	Malignant	RIF1
ACTN41	0	0.539589	0.664	0.36	0	Malignant	ACTN4
PRKAG2	0	0.539234	0.292	0.132	0	Malignant	PRKAG2
GALE1	0	0.538843	0.357	0.114	0	Malignant	GALE
SYNCRIP	0	0.5388	0.432	0.201	0	Malignant	SYNCRIP
NEO11	0	0.538323	0.344	0.117	0	Malignant	NEO1
ZBTB7A1	0	0.537985	0.665	0.396	0	Malignant	ZBTB7A
RPS15	0	0.537556	0.949	0.933	0	Malignant	RPS15
PUM3	0	0.537292	0.366	0.138	0	Malignant	PUM3
TINAGL11	0	0.536166	0.371	0.122	0	Malignant	TINAGL1
CHCHD101	0	0.534417	0.755	0.531	0	Malignant	CHCHD10
ICA1	0	0.534348	0.373	0.1	0	Malignant	ICA1
PYCR1	0	0.533809	0.274	0.069	0	Malignant	PYCR1
PRPF40A	0	0.533548	0.61	0.406	0	Malignant	PRPF40A
ZNF587	0	0.533381	0.311	0.106	0	Malignant	ZNF587
DHX32	0	0.532721	0.326	0.107	0	Malignant	DHX32
MSI2	0	0.532243	0.418	0.218	0	Malignant	MSI2
RND31	0	0.531336	0.454	0.198	0	Malignant	RND3
PPP2R1A1	0	0.530976	0.507	0.247	0	Malignant	PPP2R1A
SLC25A39	0	0.530837	0.416	0.191	0	Malignant	SLC25A39
CDC37	0	0.53046	0.658	0.423	0	Malignant	CDC37
TUBB	0	0.528657	0.506	0.287	0	Malignant	TUBB
KMT2C	0	0.527935	0.58	0.376	0	Malignant	KMT2C
ESF1	0	0.527886	0.454	0.222	0	Malignant	ESF1
QPRT	0	0.527818	0.29	0.14	0	Malignant	QPRT
MCRIP21	0	0.527513	0.454	0.206	0	Malignant	MCRIP2
SATB21	0	0.526556	0.365	0.121	0	Malignant	SATB2
IFITM3	0	0.526421	0.52	0.175	0	Malignant	IFITM3
COX6C1	0	0.526319	0.849	0.747	0	Malignant	COX6C
IPO7	0	0.525746	0.417	0.19	0	Malignant	IPO7
USP7	0	0.52568	0.476	0.232	0	Malignant	USP7
SLC39A7	0	0.524952	0.43	0.238	0	Malignant	SLC39A7
MRPS26	0	0.52471	0.416	0.181	0	Malignant	MRPS26
PARD3	0	0.524614	0.284	0.077	0	Malignant	PARD3
ZMYM2	0	0.524401	0.383	0.162	0	Malignant	ZMYM2
PPP1R16A1	0	0.524264	0.395	0.147	0	Malignant	PPP1R16A
AK31	0	0.523929	0.458	0.228	0	Malignant	AK3
PPP1R14B	0	0.521865	0.43	0.202	0	Malignant	PPP1R14B
DNTTIP1	0	0.521621	0.315	0.101	0	Malignant	DNTTIP1
CKAP5	0	0.521578	0.27	0.082	0	Malignant	CKAP5
FABP21	0	0.52109	0.267	0.127	0	Malignant	FABP2
SEC16A	0	0.521074	0.356	0.148	0	Malignant	SEC16A
COX5B1	0	0.52091	0.86	0.677	0	Malignant	COX5B
PPDPF1	0	0.520809	0.896	0.72	0	Malignant	PPDPF
PLP2	0	0.520249	0.506	0.299	0	Malignant	PLP2
ANKRD10	0	0.519746	0.373	0.165	0	Malignant	ANKRD10
COX5A1	0	0.519268	0.695	0.524	0	Malignant	COX5A
TOMM40	0	0.519211	0.339	0.123	0	Malignant	TOMM40
LBR	0	0.518507	0.434	0.203	0	Malignant	LBR
GSS	0	0.517717	0.359	0.123	0	Malignant	GSS
SSRP1	0	0.517632	0.381	0.154	0	Malignant	SSRP1
PON21	0	0.517561	0.369	0.149	0	Malignant	PON2
SRSF11	0	0.517407	0.715	0.512	0	Malignant	SRSF11
GCC21	0	0.517054	0.712	0.507	0	Malignant	GCC2
SPIRE21	0	0.517015	0.311	0.101	0	Malignant	SPIRE2
TSPAN6	0	0.516354	0.33	0.094	0	Malignant	TSPAN6
YBX3	0	0.516341	0.605	0.292	0	Malignant	YBX3
ATRX	0	0.515006	0.686	0.511	0	Malignant	ATRX
MRPL271	0	0.514752	0.462	0.227	0	Malignant	MRPL27
CAMK2N11	0	0.513623	0.711	0.311	0	Malignant	CAMK2N1
NBEAL2	0	0.512831	0.295	0.097	0	Malignant	NBEAL2
BAIAP2L11	0	0.512369	0.378	0.121	0	Malignant	BAIAP2L1
ELOB1	0	0.511995	0.812	0.693	0	Malignant	ELOB
HMGCR	0	0.51176	0.337	0.122	0	Malignant	HMGCR
SMS	0	0.511217	0.416	0.168	0	Malignant	SMS
CDK12	0	0.510884	0.377	0.189	0	Malignant	CDK12
RASEF1	0	0.507684	0.334	0.095	0	Malignant	RASEF
GNPNAT1	0	0.507379	0.292	0.069	0	Malignant	GNPNAT1
STOML2	0	0.506703	0.461	0.26	0	Malignant	STOML2
LAMB31	0	0.506043	0.387	0.162	0	Malignant	LAMB3
BRI3BP	0	0.505908	0.34	0.132	0	Malignant	BRI3BP
CTTN1	0	0.505755	0.448	0.171	0	Malignant	CTTN
CLTC1	0	0.504129	0.536	0.315	0	Malignant	CLTC
TSPO1	0	0.504078	0.726	0.515	0	Malignant	TSPO
MGST21	0	0.503554	0.415	0.162	0	Malignant	MGST2
MYO1C1	0	0.503293	0.469	0.224	0	Malignant	MYO1C
PHB2	0	0.502532	0.516	0.331	0	Malignant	PHB2
CDK6	0	0.501681	0.393	0.193	0	Malignant	CDK6
GATA6	0	0.501512	0.283	0.07	0	Malignant	GATA6
MORF4L2	0	0.500778	0.502	0.297	0	Malignant	MORF4L2
ACLY	0	0.500542	0.34	0.121	0	Malignant	ACLY
BRD7	0	0.500431	0.467	0.244	0	Malignant	BRD7
METTL26	0	0.50013	0.491	0.278	0	Malignant	METTL26
RASSF71	0	0.499798	0.475	0.21	0	Malignant	RASSF7
U2SURP	0	0.499577	0.569	0.349	0	Malignant	U2SURP
LMO71	0	0.499239	0.474	0.215	0	Malignant	LMO7
PRRC2B	0	0.499148	0.426	0.195	0	Malignant	PRRC2B
GALNT6	0	0.497967	0.278	0.071	0	Malignant	GALNT6
NSD2	0	0.497712	0.284	0.101	0	Malignant	NSD2
MAGEF1	0	0.496666	0.285	0.088	0	Malignant	MAGEF1
FZD51	0	0.496467	0.436	0.167	0	Malignant	FZD5
LRBA	0	0.496122	0.354	0.135	0	Malignant	LRBA
CUL4A	0	0.494497	0.341	0.113	0	Malignant	CUL4A
TEAD1	0	0.494087	0.26	0.054	0	Malignant	TEAD1
INTS1	0	0.493981	0.332	0.132	0	Malignant	INTS1
UGT8	0	0.49367	0.278	0.069	0	Malignant	UGT8
ETFB1	0	0.49294	0.633	0.422	0	Malignant	ETFB
TMEM106C1	0	0.491273	0.402	0.165	0	Malignant	TMEM106C
MSMO1	0	0.490129	0.264	0.09	0	Malignant	MSMO1
MVD	0	0.490015	0.294	0.116	0	Malignant	MVD
INSR1	0	0.489937	0.446	0.241	0	Malignant	INSR
NDUFS5	0	0.489674	0.726	0.585	0	Malignant	NDUFS5
BAZ1B	0	0.489184	0.431	0.226	0	Malignant	BAZ1B
ZDHHC9	0	0.488482	0.276	0.059	0	Malignant	ZDHHC9
SYNE2	0	0.487681	0.624	0.413	0	Malignant	SYNE2
RCC2	0	0.487414	0.345	0.127	0	Malignant	RCC2
SLC9A3R2	0	0.486159	0.283	0.071	0	Malignant	SLC9A3R2
KDM1A	0	0.485784	0.315	0.103	0	Malignant	KDM1A
PER2	0	0.485401	0.296	0.11	0	Malignant	PER2
MYB	0	0.4854	0.25	0.051	0	Malignant	MYB
SLC25A10	0	0.484464	0.257	0.063	0	Malignant	SLC25A10
EBNA1BP2	0	0.484417	0.348	0.14	0	Malignant	EBNA1BP2
HOXB71	0	0.484292	0.364	0.126	0	Malignant	HOXB7
COPA	0	0.483578	0.48	0.268	0	Malignant	COPA
KCNN4	0	0.48343	0.253	0.066	0	Malignant	KCNN4
TBRG4	0	0.483347	0.325	0.097	0	Malignant	TBRG4
MYO1D1	0	0.483247	0.476	0.216	0	Malignant	MYO1D
GOT2	0	0.483125	0.319	0.104	0	Malignant	GOT2
LDLR	0	0.483049	0.279	0.096	0	Malignant	LDLR
CYB5B	0	0.482848	0.388	0.164	0	Malignant	CYB5B
PFKL1	0	0.48198	0.566	0.31	0	Malignant	PFKL
MIB2	0	0.481526	0.306	0.127	0	Malignant	MIB2
FHL21	0	0.480965	0.348	0.115	0	Malignant	FHL2
PTGES21	0	0.480668	0.389	0.167	0	Malignant	PTGES2
DNPEP1	0	0.480645	0.377	0.151	0	Malignant	DNPEP
NARS	0	0.479925	0.473	0.262	0	Malignant	NARS
ANKRD17	0	0.479391	0.441	0.225	0	Malignant	ANKRD17
SND1	0	0.479286	0.406	0.21	0	Malignant	SND1
PYGB1	0	0.479201	0.416	0.211	0	Malignant	PYGB
CCT7	0	0.478932	0.457	0.276	0	Malignant	CCT7
CTNND11	0	0.478814	0.572	0.262	0	Malignant	CTNND1
TRIP11	0	0.47758	0.488	0.291	0	Malignant	TRIP11
RPL7A	0	0.476859	0.94	0.921	0	Malignant	RPL7A
EMC10	0	0.476487	0.493	0.261	0	Malignant	EMC10
PDHA11	0	0.475918	0.426	0.198	0	Malignant	PDHA1
ABCC31	0	0.475089	0.409	0.165	0	Malignant	ABCC3
SMC1A	0	0.474958	0.392	0.208	0	Malignant	SMC1A
CCDC6	0	0.474459	0.372	0.163	0	Malignant	CCDC6
SMAGP	0	0.474247	0.319	0.086	0	Malignant	SMAGP
DAZAP1	0	0.474057	0.463	0.241	0	Malignant	DAZAP1
SEC61A1	0	0.473935	0.467	0.298	0	Malignant	SEC61A1
MRPS5	0	0.473867	0.417	0.195	0	Malignant	MRPS5
HACD3	0	0.473404	0.319	0.116	0	Malignant	HACD3
NDUFB71	0	0.472708	0.774	0.584	0	Malignant	NDUFB7
PUM1	0	0.471716	0.489	0.257	0	Malignant	PUM1
ARHGAP261	0	0.471377	0.372	0.157	0	Malignant	ARHGAP26
DLGAP4	0	0.470936	0.313	0.104	0	Malignant	DLGAP4
METAP2	0	0.470867	0.509	0.292	0	Malignant	METAP2
ARFIP2	0	0.470346	0.295	0.115	0	Malignant	ARFIP2
CCT2	0	0.470312	0.445	0.235	0	Malignant	CCT2
NXPE41	0	0.47016	0.289	0.14	0	Malignant	NXPE4
ST141	0	0.469322	0.671	0.281	0	Malignant	ST14
INF21	0	0.468546	0.439	0.187	0	Malignant	INF2
ECHS11	0	0.468425	0.552	0.331	0	Malignant	ECHS1
IDH2	0	0.467839	0.427	0.25	0	Malignant	IDH2
PRDX3	0	0.467832	0.438	0.234	0	Malignant	PRDX3
XPO1	0	0.467628	0.397	0.171	0	Malignant	XPO1
DDX1	0	0.467174	0.349	0.13	0	Malignant	DDX1
LONP1	0	0.467065	0.277	0.088	0	Malignant	LONP1
RSL1D1	0	0.466717	0.485	0.283	0	Malignant	RSL1D1
PIEZO1	0	0.466559	0.275	0.099	0	Malignant	PIEZO1
CD320	0	0.465228	0.367	0.167	0	Malignant	CD320
TOB11	0	0.464956	0.608	0.379	0	Malignant	TOB1
NOM1	0	0.464657	0.271	0.094	0	Malignant	NOM1
VARS	0	0.464553	0.279	0.103	0	Malignant	VARS
SLC25A25-AS11	0	0.464227	0.321	0.13	0	Malignant	SLC25A25-AS1
EBP1	0	0.463567	0.415	0.21	0	Malignant	EBP
RAB2A	0	0.463275	0.598	0.437	0	Malignant	RAB2A
SPEN	0	0.463261	0.51	0.323	0	Malignant	SPEN
MTUS11	0	0.463172	0.407	0.17	0	Malignant	MTUS1
ST13	0	0.462908	0.605	0.42	0	Malignant	ST13
ARHGAP12	0	0.462827	0.317	0.126	0	Malignant	ARHGAP12
YBX1	0	0.462173	0.803	0.713	0	Malignant	YBX1
NCOA7	0	0.46206	0.327	0.171	0	Malignant	NCOA7
ARHGAP211	0	0.461988	0.359	0.163	0	Malignant	ARHGAP21
ERI3	0	0.461036	0.276	0.1	0	Malignant	ERI3
SVIL	0	0.460609	0.311	0.11	0	Malignant	SVIL
HEPH1	0	0.460242	0.395	0.16	0	Malignant	HEPH
TCEAL9	0	0.460155	0.352	0.15	0	Malignant	TCEAL9
FAM213A1	0	0.458952	0.361	0.13	0	Malignant	FAM213A
UQCC31	0	0.45849	0.414	0.194	0	Malignant	UQCC3
RANBP1	0	0.458385	0.462	0.288	0	Malignant	RANBP1
TMEM87A1	0	0.458062	0.474	0.251	0	Malignant	TMEM87A
RPN1	0	0.457893	0.501	0.327	0	Malignant	RPN1
MRPS18B	0	0.457583	0.37	0.167	0	Malignant	MRPS18B
NDUFS11	0	0.457515	0.467	0.23	0	Malignant	NDUFS1
HUWE1	0	0.457239	0.417	0.216	0	Malignant	HUWE1
YAP1	0	0.457147	0.268	0.063	0	Malignant	YAP1
ACADVL1	0	0.456848	0.636	0.438	0	Malignant	ACADVL
ARFGEF2	0	0.456621	0.353	0.162	0	Malignant	ARFGEF2
CDC42BPB1	0	0.456359	0.323	0.128	0	Malignant	CDC42BPB
BCAP31	0	0.456025	0.534	0.351	0	Malignant	BCAP31
SNRPD1	0	0.455892	0.397	0.194	0	Malignant	SNRPD1
FUT31	0	0.455664	0.396	0.147	0	Malignant	FUT3
COX7B1	0	0.455578	0.772	0.622	0	Malignant	COX7B
KARS	0	0.455544	0.372	0.16	0	Malignant	KARS
SNRNP200	0	0.455457	0.438	0.222	0	Malignant	SNRNP200
PRKCSH1	0	0.454889	0.514	0.294	0	Malignant	PRKCSH
F11R1	0	0.454239	0.375	0.152	0	Malignant	F11R
MCM3	0	0.454112	0.254	0.077	0	Malignant	MCM3
KCNK11	0	0.45363	0.303	0.093	0	Malignant	KCNK1
ZNF121	0	0.453615	0.267	0.069	0	Malignant	ZNF121
SHROOM31	0	0.453001	0.371	0.142	0	Malignant	SHROOM3
KIAA0319L	0	0.452854	0.341	0.149	0	Malignant	KIAA0319L
GPR1601	0	0.452228	0.354	0.173	0	Malignant	GPR160
GK51	0	0.451948	0.329	0.128	0	Malignant	GK5
MRPS12	0	0.451943	0.407	0.194	0	Malignant	MRPS12
HERC2	0	0.451134	0.338	0.165	0	Malignant	HERC2
GARS	0	0.450853	0.341	0.154	0	Malignant	GARS
IARS2	0	0.45039	0.4	0.172	0	Malignant	IARS2
IFT172	0	0.450101	0.28	0.081	0	Malignant	IFT172
SHTN1	0	0.449601	0.293	0.101	0	Malignant	SHTN1
RNPS1	0	0.449305	0.435	0.218	0	Malignant	RNPS1
SCRIB	0	0.449085	0.267	0.072	0	Malignant	SCRIB
PGRMC11	0	0.448872	0.443	0.222	0	Malignant	PGRMC1
CTNNA11	0	0.448528	0.552	0.287	0	Malignant	CTNNA1
CDC42BPA1	0	0.448521	0.366	0.157	0	Malignant	CDC42BPA
MPZL1	0	0.448086	0.349	0.139	0	Malignant	MPZL1
ADAP11	0	0.447862	0.365	0.136	0	Malignant	ADAP1
MYO1B	0	0.447857	0.282	0.08	0	Malignant	MYO1B
C1QBP	0	0.447778	0.437	0.259	0	Malignant	C1QBP
GOLGA31	0	0.447276	0.418	0.241	0	Malignant	GOLGA3
ZFC3H1	0	0.447032	0.347	0.169	0	Malignant	ZFC3H1
CBX4	0	0.446468	0.41	0.229	0	Malignant	CBX4
NDUFB101	0	0.445863	0.542	0.339	0	Malignant	NDUFB10
MAGI11	0	0.444355	0.289	0.104	0	Malignant	MAGI1
KDM7A1	0	0.444086	0.367	0.158	0	Malignant	KDM7A
RPL27A	0	0.443696	0.945	0.912	0	Malignant	RPL27A
ZMYND81	0	0.443317	0.455	0.244	0	Malignant	ZMYND8
NFE2L3	0	0.443311	0.252	0.069	0	Malignant	NFE2L3
ACP1	0	0.443224	0.45	0.258	0	Malignant	ACP1
IDH11	0	0.441635	0.344	0.122	0	Malignant	IDH1
RARRES11	0	0.441379	0.271	0.111	0	Malignant	RARRES1
RALGAPA2	0	0.441026	0.297	0.101	0	Malignant	RALGAPA2
SPG7	0	0.440904	0.303	0.121	0	Malignant	SPG7
HBEGF1	0	0.440758	0.353	0.177	0	Malignant	HBEGF
ATP5MF1	0	0.440577	0.592	0.425	0	Malignant	ATP5MF
COX4I11	0	0.440416	0.729	0.563	0	Malignant	COX4I1
SLIRP1	0	0.440306	0.427	0.227	0	Malignant	SLIRP
KIAA1147	0	0.440186	0.264	0.088	0	Malignant	KIAA1147
OLA1	0	0.439702	0.376	0.173	0	Malignant	OLA1
TSC22D11	0	0.439072	0.581	0.287	0	Malignant	TSC22D1
AGAP1	0	0.43804	0.253	0.072	0	Malignant	AGAP1
CD1641	0	0.437498	0.578	0.404	0	Malignant	CD164
CARS2	0	0.436939	0.314	0.113	0	Malignant	CARS2
NDUFV11	0	0.436909	0.498	0.289	0	Malignant	NDUFV1
MLF2	0	0.436862	0.48	0.276	0	Malignant	MLF2
NDUFV31	0	0.436544	0.384	0.187	0	Malignant	NDUFV3
NENF	0	0.436338	0.446	0.268	0	Malignant	NENF
SINHCAF	0	0.436294	0.372	0.161	0	Malignant	SINHCAF
MLLT3	0	0.436259	0.327	0.134	0	Malignant	MLLT3
LRRC75A1	0	0.435574	0.372	0.194	0	Malignant	LRRC75A
PDAP1	0	0.435471	0.308	0.133	0	Malignant	PDAP1
ZNF593	0	0.434956	0.38	0.189	0	Malignant	ZNF593
SLC7A1	0	0.434414	0.278	0.093	0	Malignant	SLC7A1
PCNA	0	0.434339	0.309	0.145	0	Malignant	PCNA
NOTCH1	0	0.434055	0.271	0.082	0	Malignant	NOTCH1
CBX3	0	0.433982	0.501	0.295	0	Malignant	CBX3
ATXN7L3B	0	0.433866	0.417	0.205	0	Malignant	ATXN7L3B
ATP9A1	0	0.433768	0.295	0.098	0	Malignant	ATP9A
ERGIC3	0	0.433568	0.418	0.242	0	Malignant	ERGIC3
HNRNPD	0	0.43293	0.563	0.376	0	Malignant	HNRNPD
CBX5	0	0.432608	0.361	0.18	0	Malignant	CBX5
PLXNB21	0	0.432592	0.435	0.21	0	Malignant	PLXNB2
CXXC5	0	0.432548	0.312	0.127	0	Malignant	CXXC5
GAS61	0	0.432448	0.367	0.192	0	Malignant	GAS6
ANKS4B1	0	0.431434	0.256	0.082	0	Malignant	ANKS4B
PLEKHA61	0	0.430644	0.287	0.096	0	Malignant	PLEKHA6
RPL29	0	0.429405	0.967	0.951	0	Malignant	RPL29
ADAM9	0	0.42923	0.306	0.11	0	Malignant	ADAM9
UCHL3	0	0.428047	0.309	0.133	0	Malignant	UCHL3
NDUFC11	0	0.427525	0.555	0.344	0	Malignant	NDUFC1
IARS	0	0.427031	0.298	0.112	0	Malignant	IARS
FAM83H	0	0.426748	0.255	0.055	0	Malignant	FAM83H
ARHGEF111	0	0.425881	0.283	0.122	0	Malignant	ARHGEF11
SMARCA4	0	0.425368	0.284	0.101	0	Malignant	SMARCA4
SLC25A11	0	0.425337	0.433	0.217	0	Malignant	SLC25A1
FAM136A	0	0.425253	0.393	0.2	0	Malignant	FAM136A
EPB41L2	0	0.425146	0.28	0.093	0	Malignant	EPB41L2
CCDC112	0	0.424862	0.285	0.114	0	Malignant	CCDC112
PKN21	0	0.424797	0.571	0.332	0	Malignant	PKN2
NFAT5	0	0.424794	0.375	0.191	0	Malignant	NFAT5
PTK61	0	0.424095	0.336	0.131	0	Malignant	PTK6
MLH3	0	0.423164	0.273	0.107	0	Malignant	MLH3
SH3BGRL21	0	0.422574	0.385	0.145	0	Malignant	SH3BGRL2
SREK1	0	0.422357	0.421	0.227	0	Malignant	SREK1
SUDS3	0	0.422014	0.407	0.204	0	Malignant	SUDS3
ELMO31	0	0.421912	0.305	0.1	0	Malignant	ELMO3
DGAT11	0	0.421885	0.536	0.265	0	Malignant	DGAT1
RPL38	0	0.42161	0.881	0.823	0	Malignant	RPL38
SLC52A21	0	0.421492	0.369	0.183	0	Malignant	SLC52A2
THOC2	0	0.421479	0.502	0.304	0	Malignant	THOC2
TTC37	0	0.421391	0.386	0.195	0	Malignant	TTC37
PKP4	0	0.421091	0.27	0.07	0	Malignant	PKP4
SMARCD2	0	0.420876	0.336	0.133	0	Malignant	SMARCD2
BZW2	0	0.420773	0.332	0.119	0	Malignant	BZW2
LARS	0	0.420285	0.408	0.201	0	Malignant	LARS
DYNC1LI21	0	0.420067	0.491	0.269	0	Malignant	DYNC1LI2
MRPS2	0	0.419747	0.287	0.097	0	Malignant	MRPS2
SLC25A36	0	0.419568	0.429	0.237	0	Malignant	SLC25A36
DAP1	0	0.419535	0.386	0.199	0	Malignant	DAP
ACSL3	0	0.419272	0.372	0.176	0	Malignant	ACSL3
UQCRC21	0	0.418414	0.516	0.318	0	Malignant	UQCRC2
AAMP	0	0.418249	0.39	0.189	0	Malignant	AAMP
MRPL52	0	0.418041	0.522	0.345	0	Malignant	MRPL52
CENPV	0	0.417974	0.274	0.08	0	Malignant	CENPV
PTK2	0	0.417922	0.286	0.083	0	Malignant	PTK2
HNRNPU	0	0.416428	0.714	0.524	0	Malignant	HNRNPU
AP3D1	0	0.416268	0.425	0.24	0	Malignant	AP3D1
GPATCH2	0	0.416077	0.334	0.162	0	Malignant	GPATCH2
BOLA3	0	0.415965	0.39	0.181	0	Malignant	BOLA3
PTPN12	0	0.415704	0.351	0.156	0	Malignant	PTPN12
HOOK11	0	0.415352	0.331	0.123	0	Malignant	HOOK1
PSMG3	0	0.414564	0.331	0.136	0	Malignant	PSMG3
MRPL4	0	0.414545	0.345	0.139	0	Malignant	MRPL4
RPL37	0	0.414149	0.973	0.943	0	Malignant	RPL37
PSMD7	0	0.413917	0.425	0.26	0	Malignant	PSMD7
ZMIZ2	0	0.413417	0.283	0.115	0	Malignant	ZMIZ2
NDUFA8	0	0.413008	0.38	0.195	0	Malignant	NDUFA8
CMAS1	0	0.412615	0.405	0.185	0	Malignant	CMAS
NSA2	0	0.412457	0.609	0.434	0	Malignant	NSA2
GPR351	0	0.412094	0.301	0.103	0	Malignant	GPR35
GSR	0	0.411755	0.324	0.129	0	Malignant	GSR
AFG3L21	0	0.411637	0.395	0.188	0	Malignant	AFG3L2
NDUFS8	0	0.410849	0.537	0.359	0	Malignant	NDUFS8
SLC12A7	0	0.410763	0.282	0.103	0	Malignant	SLC12A7
EPS8L31	0	0.410687	0.457	0.188	0	Malignant	EPS8L3
NTMT1	0	0.410613	0.329	0.147	0	Malignant	NTMT1
DGKD1	0	0.4106	0.335	0.17	0	Malignant	DGKD
CDCP11	0	0.410317	0.301	0.107	0	Malignant	CDCP1
SYMPK	0	0.409908	0.254	0.095	0	Malignant	SYMPK
SLK1	0	0.409731	0.474	0.271	0	Malignant	SLK
MRPL3	0	0.409105	0.377	0.181	0	Malignant	MRPL3
LENG8	0	0.408334	0.306	0.15	0	Malignant	LENG8
ASAP21	0	0.407214	0.319	0.124	0	Malignant	ASAP2
ATIC	0	0.406396	0.306	0.101	0	Malignant	ATIC
MYO7B1	0	0.406328	0.349	0.149	0	Malignant	MYO7B
SUCLG11	0	0.406063	0.501	0.302	0	Malignant	SUCLG1
BAG5	0	0.405881	0.358	0.161	0	Malignant	BAG5
CHD4	0	0.405688	0.385	0.192	0	Malignant	CHD4
ACIN11	0	0.40532	0.49	0.289	0	Malignant	ACIN1
LYPLA1	0	0.405073	0.41	0.226	0	Malignant	LYPLA1
VPS35	0	0.405066	0.474	0.268	0	Malignant	VPS35
SH3YL1	0	0.403913	0.288	0.08	0	Malignant	SH3YL1
QARS	0	0.403694	0.312	0.118	0	Malignant	QARS
CYB561	0	0.403499	0.26	0.074	0	Malignant	CYB561
AIMP1	0	0.40285	0.441	0.227	0	Malignant	AIMP1
GIGYF1	0	0.401969	0.288	0.123	0	Malignant	GIGYF1
PMPCA	0	0.401916	0.297	0.105	0	Malignant	PMPCA
RPS6	0	0.401549	0.965	0.929	0	Malignant	RPS6
NCBP2-AS21	0	0.400503	0.351	0.15	0	Malignant	NCBP2-AS2
IBTK	0	0.400208	0.32	0.135	0	Malignant	IBTK
MMAB	0	0.399732	0.265	0.083	0	Malignant	MMAB
PTPRK	0	0.399585	0.301	0.1	0	Malignant	PTPRK
RPS11	0	0.397534	0.958	0.936	0	Malignant	RPS11
C1orf131	0	0.397094	0.335	0.146	0	Malignant	C1orf131
CEP290	0	0.396622	0.288	0.125	0	Malignant	CEP290
HDAC11	0	0.396526	0.479	0.253	0	Malignant	HDAC1
NONO	0	0.396403	0.428	0.235	0	Malignant	NONO
ACSL51	0	0.396325	0.428	0.2	0	Malignant	ACSL5
BRD3	0	0.396052	0.316	0.116	0	Malignant	BRD3
PAFAH1B3	0	0.39546	0.274	0.082	0	Malignant	PAFAH1B3
UBAP2	0	0.395293	0.286	0.109	0	Malignant	UBAP2
GUCY2C1	0	0.395177	0.286	0.088	0	Malignant	GUCY2C
UBN2	0	0.394591	0.292	0.127	0	Malignant	UBN2
NFIA	0	0.394378	0.316	0.096	0	Malignant	NFIA
VGLL4	0	0.394063	0.347	0.141	0	Malignant	VGLL4
EBPL	0	0.393927	0.327	0.146	0	Malignant	EBPL
SRP9	0	0.393852	0.51	0.332	0	Malignant	SRP9
MDN1	0	0.393705	0.25	0.09	0	Malignant	MDN1
EFNB11	0	0.393152	0.306	0.107	0	Malignant	EFNB1
H2AFJ1	0	0.392701	0.551	0.322	0	Malignant	H2AFJ
IMPA21	0	0.392618	0.307	0.121	0	Malignant	IMPA2
NDUFS21	0	0.392113	0.472	0.264	0	Malignant	NDUFS2
MCCC2	0	0.391826	0.285	0.088	0	Malignant	MCCC2
TFCP2L11	0	0.39172	0.366	0.158	0	Malignant	TFCP2L1
PUS7L	0	0.391447	0.287	0.116	0	Malignant	PUS7L
KDM5B	0	0.391367	0.351	0.169	0	Malignant	KDM5B
UQCC2	0	0.391367	0.381	0.204	0	Malignant	UQCC2
CEP170B1	0	0.39127	0.286	0.108	0	Malignant	CEP170B
CCT4	0	0.391197	0.459	0.272	0	Malignant	CCT4
NOB1	0	0.391189	0.284	0.095	0	Malignant	NOB1
BAIAP2L21	0	0.391025	0.281	0.105	0	Malignant	BAIAP2L2
MRPL411	0	0.390648	0.617	0.413	0	Malignant	MRPL41
SMAD2	0	0.390396	0.395	0.204	0	Malignant	SMAD2
ASS11	0	0.389518	0.406	0.172	0	Malignant	ASS1
TTC17	0	0.389121	0.312	0.148	0	Malignant	TTC17
MAVS1	0	0.38887	0.393	0.194	0	Malignant	MAVS
GOLGA4	0	0.387881	0.38	0.204	0	Malignant	GOLGA4
ARHGEF161	0	0.387834	0.287	0.114	0	Malignant	ARHGEF16
CLCN31	0	0.386923	0.404	0.195	0	Malignant	CLCN3
SNRPE	0	0.386195	0.415	0.233	0	Malignant	SNRPE
RAB11A1	0	0.385909	0.481	0.263	0	Malignant	RAB11A
RBCK1	0	0.385002	0.293	0.128	0	Malignant	RBCK1
MTIF2	0	0.383628	0.294	0.108	0	Malignant	MTIF2
EIF2S3	0	0.383424	0.376	0.205	0	Malignant	EIF2S3
SNRPA	0	0.383391	0.303	0.117	0	Malignant	SNRPA
ZNF638	0	0.383027	0.391	0.209	0	Malignant	ZNF638
DUS1L	0	0.38282	0.265	0.104	0	Malignant	DUS1L
NDFIP21	0	0.382393	0.401	0.182	0	Malignant	NDFIP2
DAAM1	0	0.381996	0.345	0.156	0	Malignant	DAAM1
NR2F2	0	0.381842	0.294	0.088	0	Malignant	NR2F2
LARP4	0	0.381809	0.331	0.158	0	Malignant	LARP4
DNAJC2	0	0.381509	0.326	0.135	0	Malignant	DNAJC2
GPATCH4	0	0.381114	0.297	0.108	0	Malignant	GPATCH4
CXCL3	0	0.380658	0.251	0.062	0	Malignant	CXCL3
IWS1	0	0.380648	0.293	0.127	0	Malignant	IWS1
CAPRIN1	0	0.380539	0.384	0.185	0	Malignant	CAPRIN1
TMEM87B1	0	0.380414	0.345	0.157	0	Malignant	TMEM87B
PTAR1	0	0.3803	0.275	0.124	0	Malignant	PTAR1
CEBPZ	0	0.380213	0.475	0.26	0	Malignant	CEBPZ
C19orf701	0	0.380194	0.581	0.39	0	Malignant	C19orf70
BLVRB1	0	0.379831	0.493	0.282	0	Malignant	BLVRB
SLC1A5	0	0.379776	0.394	0.217	0	Malignant	SLC1A5
KIF16B1	0	0.37946	0.328	0.145	0	Malignant	KIF16B
SOWAHC1	0	0.378498	0.287	0.097	0	Malignant	SOWAHC
PTBP1	0	0.377024	0.515	0.307	0	Malignant	PTBP1
MRPS33	0	0.376973	0.396	0.221	0	Malignant	MRPS33
UBR4	0	0.376802	0.347	0.161	0	Malignant	UBR4
DDX21	0	0.376538	0.606	0.4	0	Malignant	DDX21
PRPF6	0	0.375572	0.424	0.235	0	Malignant	PRPF6
VPS361	0	0.375115	0.421	0.246	0	Malignant	VPS36
DDX54	0	0.374787	0.305	0.128	0	Malignant	DDX54
TULP4	0	0.374772	0.36	0.191	0	Malignant	TULP4
CRLS1	0	0.374351	0.306	0.121	0	Malignant	CRLS1
CNOT1	0	0.373908	0.437	0.231	0	Malignant	CNOT1
RBM471	0	0.373689	0.535	0.279	0	Malignant	RBM47
TCF20	0	0.373523	0.273	0.098	0	Malignant	TCF20
DHCR241	0	0.373376	0.274	0.093	0	Malignant	DHCR24
MUC131	0	0.37295	0.635	0.254	0	Malignant	MUC13
NSD1	0	0.37286	0.306	0.152	0	Malignant	NSD1
TMC41	0	0.37267	0.358	0.156	0	Malignant	TMC4
EIF2AK1	0	0.371712	0.32	0.14	0	Malignant	EIF2AK1
PLEC1	0	0.371675	0.459	0.262	0	Malignant	PLEC
NPEPPS1	0	0.371657	0.394	0.203	0	Malignant	NPEPPS
RBM26	0	0.371561	0.364	0.196	0	Malignant	RBM26
ATP10B1	0	0.371184	0.301	0.111	0	Malignant	ATP10B
CUX1	0	0.370711	0.288	0.119	0	Malignant	CUX1
MPST1	0	0.369346	0.602	0.333	0	Malignant	MPST
CASP6	0	0.36932	0.295	0.106	0	Malignant	CASP6
POLR2I	0	0.369071	0.448	0.273	0	Malignant	POLR2I
LPGAT1	0	0.368927	0.319	0.139	0	Malignant	LPGAT1
PRR14L	0	0.36845	0.261	0.121	0	Malignant	PRR14L
[truncated: 11,976 more rows]

## Sheet: Table S5
																				intersectGenes-R		intersectGenes-TISCH2
																				ACADS		ACADS
																				ACAT1		ACAT1
																				ALDH6A1		ALDH6A1
																				HADHA		HADHA
																				HMGCL		HMGCL
																				HSD17B10		HSD17B10
																				IVD		IVD
																				MYC		MYC
																				NOTCH1		NOTCH1
																				NOTCH3		NOTCH3
																				NOTCH4		NOTCH4
																				SLC1A5		SLC1A5
																				SLC7A5		SLC7A5
																				SLC7A8		SLC7A8
												Screening of differentially expressed BCAA metabolism-related genes
		Distribution of 13 cell types in GSE166555 by R software
